# Supplementary material for: Comparative efficacy of vasoactive medications in patients with septic shock: a network meta-analysis of randomized controlled trials
Source: Springer Nature journal article supplement (doi:10.1186/s13054-019-2427-4), 2019-05-14

## **SUPPLEMENTARY APPENDIX**

### **Comparative efficacy of vasoactive medications in patients with septic shock: a network meta-analysis of randomized controlled trials.**

|                            |         |
|----------------------------|---------|
| Search strategy for PubMed | page 2  |
| Included Studies           | page 4  |
| Table S1                   | page 11 |
| Table S2                   | page 38 |
| Figure S1-S3               | page 42 |
| Figure S4-S9               | page 45 |
| Figure S10-S15             | page 51 |
| Figure S16-S21             | page 57 |

## Search strategy for Medline

1. sepsis; ti, ab.
2. Septic shock; ti, ab.
3. 1 or 2
4. vasoactive agent; ti, ab.
5. norepinephrine; ti, ab.
6. epinephrine; ti, ab.
7. adrenaline; ti, ab.
8. dopamine; ti, ab.
9. dobutamine; ti, ab.
10. phenylephrine; ti, ab.
11. vasopressin; ti, ab.
12. terlipressin; ti,ab.
13. Angiotensin; ti,ab.
14. 4 or 5 or 6 or 7 or 8 or 9 or 10 or 11 or 12 or 13
15. randomized controlled trial; pt.
16. controlled clinical trial; pt.
17. randomized; ti, ab.
18. placebo; ti, ab.
19. randomly; ti, ab.
20. trial; ti.
21. 15 or 16 or 17 or 18 or 19 or 20

22. 3 and 14 and 21

## Included studies

1. Martin C, Papazian L, Perrin G, Saux P, Gouin F. Norepinephrine or dopamine for the treatment of hyperdynamic septic shock? *Chest*. 1993, 103(6): 1826-31.
2. Marik PE, Mohedin M. The contrasting effects of dopamine and norepinephrine on systemic and splanchnic oxygen utilization in hyperdynamic sepsis. *JAMA*. 1994, 272(17):1354-7.
3. Levy B, Bollaert PE, Charpentier C, Nace L, Audibert G, Bauer P, et al. Comparison of norepinephrine and dobutamine to epinephrine for hemodynamics, lactate metabolism, and gastric tonometric variables in septic shock: a prospective, randomized study. *Intensive Care Med*. 1997, 23(3):282-7.
4. Malay MB, Ashton RC Jr, Landry DW, Townsend RN. Low-dose vasopressin in the treatment of vasodilatory septic shock. *J Trauma*. 1999, 47(4):699-703; discussion 703-5.
5. Kern H, Schröder T, Kaulfuss M, Martin M, Kox WJ, Spies CD. Enoximone in contrast to dobutamine improves hepatosplanchnic function in fluid-optimized septic shock patients. *Crit Care Med*. 2001, 29(8):1519-25.
6. Seguin P, Bellissant E, Le Tulzo Y, Laviolle B, Lessard Y, Thomas R, et al. Effects of epinephrine compared with the combination of dobutamine and norepinephrine on gastric perfusion in septic shock. *Clin Pharmacol Ther*. 2002, 71(5):381-8.
7. Patel BM, Chittock DR, Russell JA, Walley KR. Beneficial effects of short-term vasopressin infusion during severe septic shock. *Anesthesiology*. 2002, 96(3):576-82.

8. Dünser MW, Mayr AJ, Ulmer H, Knotzer H, Sumann G, Pajk W, et al. Arginine vasopressin in advanced vasodilatory shock: a prospective, randomized, controlled study. *Circulation*. 2003, 107(18):2313-9.
9. Morelli A, De Castro S, Teboul JL, Singer M, Rocco M, Conti G, et al. Effects of levosimendan on systemic and regional hemodynamics in septic myocardial depression. *Intensive Care Med*. 2005, 31(5):638-44.
10. Albanèse J, Leone M, Delmas A, Martin C. Terlipressin or norepinephrine in hyperdynamic septic shock: a prospective, randomized study. *Crit Care Med*. 2005, 33(9):1897-902.
11. Luckner G1, Dünser MW, Stadlbauer KH, Mayr VD, Jochberger S, Wenzel V, et al. Cutaneous vascular reactivity and flow motion response to vasopressin in advanced vasodilatory shock and severe postoperative multiple organ dysfunction syndrome. *Crit Care*. 2006, 10(2):R40.
12. Seguin P, Laviolle B, Guinet P, Morel I, Mallédant Y, Bellissant E. Dopexamine and norepinephrine versus epinephrine on gastric perfusion in patients with septic shock: a randomized study [NCT00134212]. *Crit Care*. 2006, 10(1):R32.
13. Schmoelz M, Schelling G, Dunker M, Irlbeck M. Comparison of systemic and renal effects of dopexamine and dopamine in norepinephrine-treated septic shock. *J Cardiothorac Vasc Anesth*. 2006, 20(2):173-8.
14. Lauzier F, Lévy B, Lamarre P, Lesur O. Vasopressin or norepinephrine in early hyperdynamic septic shock: a randomized clinical trial. *Intensive Care Med*. 2006, 32(11):1782-9.

15. Mathur SK, Dhunna R, Chakraborty A. Comparison of norepinephrine and dopamine in the management of septic shock using impedance cardiography. *Indian J Crit Care Med.* 2007, 11(4):184-191.
16. Annane D, Vignon P, Renault A, Bollaert PE, Charpentier C, Martin C, et al. Norepinephrine plus dobutamine versus epinephrine alone for management of septic shock: a randomised trial. *Lancet.* 2007, 370(9588):676-84.
17. Myburgh JA, Higgins A, Jovanovska A, Lipman J, Ramakrishnan N, Santamaria J, et al. A comparison of epinephrine and norepinephrine in critically ill patients. *Intensive Care Med.* 2008, 34(12):2226-34.
18. Morelli A, Ertmer C, Lange M, Dünser M, Rehberg S, Van Aken H, et al. Effects of short-term simultaneous infusion of dobutamine and terlipressin in patients with septic shock: the DOBUPRESS study. *Br J Anaesth.* 2008, 100(4):494-503.
19. Morelli A, Ertmer C, Rehberg S, Lange M, Orecchioni A, Laderchi A, et al. Phenylephrine versus norepinephrine for initial hemodynamic support of patients with septic shock: a randomized, controlled trial. *Crit Care.* 2008, 12(6):R143.
20. Russell JA, Walley KR, Singer J, Gordon AC, Hébert PC, Cooper DJ, et al. Vasopressin versus norepinephrine infusion in patients with septic shock. *N Engl J Med.* 2008, 358(9):877-87.
21. Morelli A, Ertmer C, Rehberg S, Lange M, Orecchioni A, Cecchini V, et al. Continuous terlipressin versus vasopressin infusion in septic shock (TERLIVAP): a randomized, controlled pilot study. *Crit Care.* 2009, 13(4):R130.
22. Alhashemi JA, Alotaibi QA, Abdullah GM, Shalabi SA. Levosimendan vs

- dobutamine in septic shock. *J Crit Care*. 2009, 24(3):e14-5.
23. De Backer D, Biston P, Devriendt J, Madl C, Chochrad D, Aldecoa C, et al. Comparison of dopamine and norepinephrine in the treatment of shock. *N Engl J Med*. 2010, 362(9):779-89.
24. Jain G, Singh DK. Comparison of phenylephrine and norepinephrine in the management of dopamine-resistant septic shock. *Indian J Crit Care Med*. 2010, 14(1):29-34.
25. Patel GP, Grahe JS, Sperry M, Singla S, Elpern E, Lateef O, et al. Efficacy and safety of dopamine versus norepinephrine in the management of septic shock. *Shock*. 2010, 33(4):375-80.
26. Morelli A, Donati A, Ertmer C, Rehberg S, Lange M, Orecchioni A, et al. Levosimendan for resuscitating the microcirculation in patients with septic shock: a randomized controlled study. *Crit Care*. 2010, 14(6):R232.
27. Morelli A, Donati A, Ertmer C, Rehberg S, Kampmeier T, Orecchioni A, et al. Effects of vasopressinergic receptor agonists on sublingual microcirculation in norepinephrine-dependent septic shock. *Crit Care*. 2011, 15(5):R217.
28. Han XD, Sun H, Huang XY, Zhang SY, Wang YD, Ren K, et al. A clinical study of pituitrin versus norepinephrine in the treatment of patients with septic shock. *Zhongguo Wei Zhong Bing Ji Jiu Yi Xue*. 2012, 24(1):33-7.
29. Mahmoud KM, Ammar AS. Norepinephrine supplemented with dobutamine or epinephrine for the cardiovascular support of patients with septic shock. *Indian J Crit Care Med*. 2012, 16(2):75-80.

30. Memiş D, Inal MT, Sut N. The effects of levosimendan vs dobutamine added to dopamine on liver functions assessed with noninvasive liver function monitoring in patients with septic shock. *J Crit Care*. 2012, 27(3):318.e1-6.
31. Mehta S, Granton J, Gordon AC, Cook DJ, Lapinsky S, Newton G, et al. Cardiac ischemia in patients with septic shock randomized to vasopressin or norepinephrine. *Crit Care*. 2013, 17(3):R117.
32. Hua F, Wang X, Zhu L. Terlipressin decreases vascular endothelial growth factor expression and improves oxygenation in patients with acute respiratory distress syndrome and shock. *J Emerg Med*. 2013, 44(2):434-9.
33. Fang M, Dong S. Effects of levosimendan on hemodynamics and cardiac function in patients with septic shock. *Zhonghua Wei Zhong Bing Ji Jiu Yi Xue*. 2014, 26(10):692-6.
34. Torraco A, Carrozzo R, Piemonte F, Pastore A, Tozzi G, Verrigni D, et al. Effects of levosimendan on mitochondrial function in patients with septic shock: a randomized trial. *Biochimie*. 2014, 102:166-73.
35. Gordon AC, Mason AJ, Thirunavukkarasu N, Perkins GD, Cecconi M, Cepkova M, et al. Effect of Early Vasopressin vs Norepinephrine on Kidney Failure in Patients With Septic Shock: The VANISH Randomized Clinical Trial. *JAMA*. 2016, 316(5):509-18.
36. Xiao X, Zhang J, Wang Y, Zhou J, Zhu Y, Jiang D, et al. Effects of terlipressin on patients with sepsis via improving tissue blood flow. *J Surg Res*. 2016, 200(1):274-82.



37. Gordon AC, Perkins GD, Singer M, McAuley DF, Orme RM, Santhakumaran S, et al. Levosimendan for the Prevention of Acute Organ Dysfunction in Sepsis. *N Engl J Med*. 2016, 375(17):1638-1648.
38. Meng JB, Hu MH, Lai ZZ, Ji CL, Xu XJ, Zhang G, et al. Levosimendan Versus Dobutamine in Myocardial Injury Patients with Septic Shock: A Randomized Controlled Trial. *Med Sci Monit*. 2016, 22:1486-96.
39. Barzegar E, Ahmadi A, Mousavi S, Nouri M, Mojtahedzadeh M. The Therapeutic Role of Vasopressin on Improving Lactate Clearance During and After Vasogenic Shock: Microcirculation, Is It The Black Box? *Acta Med Iran*. 2016, 54(1):15-23.
40. Choudhury A, Kedarisetty CK, Vashishtha C, Saini D, Kumar S, Maiwall R, et al. A randomized trial comparing terlipressin and noradrenaline in patients with cirrhosis and septic shock. *Liver Int*. 2017, 37(4):552-561.
41. Chen Z, Zhou P, Lu Y, Yang C. Comparison of effect of norepinephrine and terlipressin on patients with ARDS combined with septic shock: a prospective single-blind randomized controlled trial. *Zhonghua Wei Zhong Bing Ji Jiu Yi Xue*. 2017, 29(2):111-116.
42. Hajjej Z, Meddeb B, Sellami W, Labbene I, Morelli A, Ferjani M. Effects of Levosimendan on Cellular Metabolic Alterations in Patients With Septic Shock: A Randomized Controlled Pilot Study. *Shock*. 2017, 48(3):307-312.
43. Russell JA, Vincent JL, Kjølbye AL, Olsson H, Blemings A, Spapen H, et al. Selepressin, a novel selective vasopressin V1A agonist, is an effective substitute for norepinephrine in a phase IIa randomized, placebo-controlled trial in septic shock

patients. Crit Care. 2017, 21(1):213.

**Table S1 Studies characteristics: management description of included randomized controlled trials**

| ID | Source           | Group | Management description                                                                                                                                                                                    | Baseline characteristics |      |       |            |             |                 |                 |    |          |
|----|------------------|-------|-----------------------------------------------------------------------------------------------------------------------------------------------------------------------------------------------------------|--------------------------|------|-------|------------|-------------|-----------------|-----------------|----|----------|
|    |                  |       |                                                                                                                                                                                                           | APACHE II                | SOFA | MAP   | HR         | CI          | DO <sub>2</sub> | VO <sub>2</sub> | PH | Lactate  |
| 1  | Martin C<br>1993 | A     | Dopamine: started at a dose of 2.5µg/kg/min, to a maximum dose of 25µg/kg/min. If hemodynamic and metabolic abnormalities were not corrected with the maximum dose of one drug, the other was added.      | 30± 1.2                  | NA   | 53±8  | 110<br>±20 | 5.4±<br>1.1 | 745±2<br>06     | 178<br>±65      | NA | 4.8±3.2  |
|    |                  | B     | Norepinephrine: started at a dose of 0.5µg/kg/min, to a maximum dose of 5µg/kg/min. If hemodynamic and metabolic abnormalities were not corrected with the maximum dose of one drug, the other was added. | 31±1.3                   | NA   | 54±10 | 113<br>±21 | 5.3±<br>1.3 | 801±2<br>31     | 208<br>±70      | NA | 4.8± 1.6 |
| 2  | Marik PE<br>1994 | A     | Norepinephrine: titrated during a period of 20 minutes to achieve a MAP greater than 75 mm Hg.                                                                                                            | 18±1                     | NA   | 65±4  | 105<br>±5  | 4.2±<br>0.5 | 498±7<br>7      | 145<br>±21      | NA | 1.8±0.5  |
|    |                  | B     | Dopamine: titrated during a period                                                                                                                                                                        | 17±2                     | NA   | 63±2  | 121        | 4.2±        | 573±5           | 183             | NA | 2.2±0.4  |

|   |                    |   |                                                                                                                                                                                                                                                                                                             |              |    |            |                     |                    |    |          |                                |               |
|---|--------------------|---|-------------------------------------------------------------------------------------------------------------------------------------------------------------------------------------------------------------------------------------------------------------------------------------------------------------|--------------|----|------------|---------------------|--------------------|----|----------|--------------------------------|---------------|
|   |                    |   | of 20 minutes to achieve a MAP greater than 75 mm Hg, and to keep the pulse rate less than 150 beats per minute.                                                                                                                                                                                            |              |    |            | $\pm 4$             | 0.4                | 4  | $\pm 29$ |                                |               |
| 3 | Levy B<br><br>1997 | A | Epinephrine: Patients with a CI > 3.5 l/min/m <sup>2</sup> and a MAP $\leq$ 60 mmHg after dopamine 20 mg/kg/min started epinephrine infusion with a dose of 0.3 mg/kg/min. The infusion rate of epinephrine was titrated on MAP at 5-min intervals to obtain a MAP > 80 mmHg with a stable or increased CI. | 23 $\pm$ 4.6 | NA | 60 $\pm$ 8 | 121<br><br>$\pm 19$ | 4.1 $\pm$<br><br>1 | NA | NA       | 7.35<br><br>$\pm 0.0$<br><br>7 | 3.1 $\pm$ 1.5 |
|   |                    | B | Norepinephrine/Dobutamine: Patients with a CI > 3.5 l/min/m <sup>2</sup> and a MAP $\leq$ 60 mmHg after dopamine 20 mg/kg/min started norepinephrine infusion with a dose of 0.3 mg/kg/min and dobutamine was infused at a fixed dose of 5 mg/kg/min. The infusion rate of                                  | 24 $\pm$ 5.8 | NA | 60 $\pm$ 8 | 125<br><br>$\pm 15$ | 4.0 $\pm$<br><br>1 | NA | NA       | 7.37<br><br>$\pm 0.1$<br><br>1 | 3.1 $\pm$ 1.5 |

|   |                      |   |                                                                                                                                      |            |        |                           |                             |                              |                              |                                      |    |                      |
|---|----------------------|---|--------------------------------------------------------------------------------------------------------------------------------------|------------|--------|---------------------------|-----------------------------|------------------------------|------------------------------|--------------------------------------|----|----------------------|
|   |                      |   | norepinephrine was titrated on MAP<br><br>at 5-min intervals to obtain a<br><br>MAP > 80 mmHg with a stable or<br><br>increased CI.  |            |        |                           |                             |                              |                              |                                      |    |                      |
| 4 | Malay<br><br>MB 1999 | A | Placebo: normal saline was infused.                                                                                                  | 26±3       | NA     | 66.0±<br><br>6.0          | 116.<br><br>0±7.<br><br>0   | 5.6±<br><br>0.9              | 709.0<br><br>±71.0           | NA                                   | NA | NA                   |
|   |                      | B | Vasopressin: started at a dose of<br><br>0.04U/min.                                                                                  | 27±2       | NA     | 64.0±<br><br>6.0          | 126.<br><br>0±1<br><br>3.0  | 4.3±<br><br>0.5              | 593.0<br><br>±63.0           | NA                                   | NA | NA                   |
| 5 | Kern H<br><br>2001   | A | Enoximone: 2.5 mg/kg/min initially,<br><br>increased by 2.5 mg/kg/min every 2<br><br>hours, up to a maximum of 10<br><br>mg/kg/min). | 15 (11,21) | NA     | 81<br><br>(76,86<br><br>) | 103<br><br>(95,<br><br>111) | 4.9<br><br>(3.9,<br><br>6.2) | 721<br><br>(524,9<br><br>21) | 175<br><br>(132<br><br>,199<br><br>) | NA | 1.6<br><br>(1.2,3.5) |
|   |                      | B | Dobutamine: 5 mg/kg/min initially,<br><br>increased by 5 mg/kg/min every 2<br><br>hours, up to a maximum of 20<br><br>mg/kg/min.     | 19 (11,22) | NA     | 84<br><br>(77,88<br><br>) | 103<br><br>(86,<br><br>118) | 4.8<br><br>(3.4,<br><br>5.8) | 687<br><br>(508,8<br><br>58) | 158<br><br>(140<br><br>,183<br><br>) | NA | 1.8<br><br>(1.3,3.1) |
| 6 | Seguin P<br><br>2002 | A | Epinephrine: titrated from 0.1<br><br>µg/kg/min, with 0.2 µg/kg/min<br><br>increases every 5 minutes.                                | NA         | 10 ± 3 | 54 ± 8                    | 97 ±<br><br>17              | 3.2<br><br>±<br><br>1.1      | NA                           | NA                                   | NA | 3.9 ±<br><br>2.6     |
|   |                      | B | Dobutamine/ Norepinephrine:                                                                                                          | NA         | 10 ± 3 | 51 ± 8                    | 99 ±                        | 3.0                          | NA                           | NA                                   | NA | 5.3 ±                |

|   |                      |   |                                                                                                                                                                                                                                                                                                                                                                                                                                                                                               |           |    |                   |                             |                              |    |    |    |     |
|---|----------------------|---|-----------------------------------------------------------------------------------------------------------------------------------------------------------------------------------------------------------------------------------------------------------------------------------------------------------------------------------------------------------------------------------------------------------------------------------------------------------------------------------------------|-----------|----|-------------------|-----------------------------|------------------------------|----|----|----|-----|
|   |                      |   | norepinephrine titrated from 0.1<br><br>µg/kg/min, with 0.2 µg/kg/min<br><br>increases every 5 minutes, while<br><br>dobutamine was continuously<br><br>infused at 5 µg/kg/min.                                                                                                                                                                                                                                                                                                               |           |    |                   | 26                          | ±<br><br>1.3                 |    |    |    | 4.3 |
| 7 | Patel BM<br><br>2002 | A | Norepinephrine: During the initial<br><br>60 min of the pre- 4h infusion<br><br>protocol, norepinephrine was<br><br>titrated (infusion increased by 7<br><br>ml/h every 5–10 min), and the pre-<br><br>study vasopressor agent was titrated<br><br>down to maintain mean arterial<br><br>pressure constant at a level<br><br>determined by the attending<br><br>intensive care physician.<br><br>Norepinephrine titrated at a dose of<br><br>2 µg/min, to a maximum dose of 16<br><br>µg/min. | 24(19,30) | NA | 68(65,<br><br>70) | 97(8<br><br>9,11<br><br>0)  | 5.0(<br><br>3.8,<br><br>5.6) | NA | NA | NA | NA  |
|   |                      | B | Vasopressin: During the initial 60<br><br>min of the pre- 4h infusion protocol,<br><br>norepinephrine was titrated<br><br>(infusion increased by 7 ml/h every                                                                                                                                                                                                                                                                                                                                 | 22(20,27) | NA | 69(65,<br><br>72) | 102(<br><br>90,1<br><br>10) | 4.8(<br><br>3.5,<br><br>5.5) | NA | NA | NA | NA  |

|   |                   |   |                                                                                                                                                                                                                                                                                                                                                                                   |    |    |            |                 |    |    |    |                        |               |
|---|-------------------|---|-----------------------------------------------------------------------------------------------------------------------------------------------------------------------------------------------------------------------------------------------------------------------------------------------------------------------------------------------------------------------------------|----|----|------------|-----------------|----|----|----|------------------------|---------------|
|   |                   |   | 5–10 min), and the pre-study vasopressor agent was titrated down to maintain mean arterial pressure constant at a level determined by the attending intensive care physician. Vasopressin titrated at a dose of 0.01 u/min, to a maximum dose of 0.08 u/min.                                                                                                                      |    |    |            |                 |    |    |    |                        |               |
| 8 | Dünser<br>MW 2003 | A | Arginine vasopressin (AVP): additional AVP infusion was administered, including infusion of AVP at a constant rate of 4 U/h. No bolus injections were given. NE infusion was adjusted to maintain MAP $\geq 70$ mm Hg. When NE requirements decreased to $< 0.3$ $\mu\text{g/kg/min}$ . AVP infusion was tapered off stepwise according to the response of MAP to AVP reductions. | NA | NA | 63 $\pm$ 7 | 115<br>$\pm 17$ | NA | NA | NA | 7.35<br>$\pm 0.1$<br>1 | 4.8 $\pm$ 4.4 |
|   |                   | B | Norepinephrine: MAP $\geq 70$ mm Hg was achieved by adjusting NE                                                                                                                                                                                                                                                                                                                  | NA | NA | 67 $\pm$ 8 | 103<br>$\pm 20$ | NA | NA | NA | 7.34<br>$\pm 0.1$      | 4.5 $\pm$ 4.7 |

|   |                   |   |                                                                                                                                                                                                                                                                                                                                                                                             |          |    |              |             |             |            |            |    |         |
|---|-------------------|---|---------------------------------------------------------------------------------------------------------------------------------------------------------------------------------------------------------------------------------------------------------------------------------------------------------------------------------------------------------------------------------------------|----------|----|--------------|-------------|-------------|------------|------------|----|---------|
|   |                   |   | infusion as necessary. For those patients in whom NE requirements exceeded 2.26 µg/kg/min, additional AVP infusion was initiated at 4 U/h.                                                                                                                                                                                                                                                  |          |    |              |             |             |            |            | 1  |         |
| 9 | Morelli A<br>2005 | A | Dobutamine: patients received norepinephrine to maintain MAP between 70 and 80 mmHg. Dobutamine 5µg/kg/min was added to norepinephrine infusion. This therapeutic regimen was maintained during the first 48 h of the study. The dobutamine infusion was then stopped for a short time necessary to start the syringe-pumps. Then patients received an infusion of dobutamine (5µg/kg/min). | 23.7±2.1 | NA | 74.7±<br>2.4 | 115<br>±7.3 | 4.2±<br>0.3 | 721±5<br>9 | 225<br>±23 | NA | 5.2±1.1 |
|   |                   | B | Levosimendan: patients received norepinephrine to maintain MAP between 70 and 80 mmHg. Dobutamine 5µg/kg/min was added to norepinephrine infusion. This                                                                                                                                                                                                                                     | 24.4±1.6 | NA | 76.2±<br>2.8 | 114<br>±8.3 | 4.1±<br>0.2 | 715±5<br>8 | 223<br>±36 | NA | 4.9±1.2 |



|    |                        |   |                                                                                                                                                                                                                                                                                               |            |    |                    |                        |                       |    |    |                            |                  |
|----|------------------------|---|-----------------------------------------------------------------------------------------------------------------------------------------------------------------------------------------------------------------------------------------------------------------------------------------------|------------|----|--------------------|------------------------|-----------------------|----|----|----------------------------|------------------|
|    |                        |   | <p>therapeutic regimen was maintained during the first 48 h of the study.</p> <p>The dobutamine infusion was then stopped for a short time necessary to start the syringe-pumps. Then patients received an infusion of levosimendan (0.2µg/kg/min) without an initial bolus loading dose.</p> |            |    |                    |                        |                       |    |    |                            |                  |
| 10 | Albanèse<br><br>J 2005 | A | <p>Norepinephrine: started at a dose of 0.3 µg/kg/min followed by 0.3 µg/kg/min increments at 4-min intervals to raise MAP to 65 to 75 mm Hg.</p>                                                                                                                                             | 29 (24,31) | NA | 54<br><br>(49,61 ) | 118<br><br>(84, 135)   | 5.1<br><br>(4.1, 6.1) | NA | NA | 7.40<br><br>(7.2, 2.7, 46) | NA               |
|    |                        | B | <p>Terlipressin: patients were given one bolus of 1 mg of the drug equivalent to 0.03– 0.04 UI/min of vasopressin. A second bolus of 1 mg was given if, after 20 minutes, MAP was &lt;65 mm Hg.</p>                                                                                           | 28 (24,30) | NA | 54<br><br>(48,62 ) | 119<br><br>(811 ,134 ) | 5.0<br><br>(4.0, 6.2) | NA | NA | 7.40<br><br>(7.2, 3.7, 45) | NA               |
| 11 | Luckner<br><br>G 2006  | A | <p>Vasopressin/ Norepinephrine: supplementary AVP was infused at a</p>                                                                                                                                                                                                                        | NA         | NA | 64±5               | NA                     | 4.1±<br><br>1.2       | NA | NA | 7.30<br><br>±              | 5.9 ±<br><br>6.7 |

|    |                  |   |                                                                                                                                                                                                                                               |           |        |        |          |         |    |    |            |           |
|----|------------------|---|-----------------------------------------------------------------------------------------------------------------------------------------------------------------------------------------------------------------------------------------------|-----------|--------|--------|----------|---------|----|----|------------|-----------|
|    |                  |   | continuous rate of 4 IU/hour; no bolus injections were administered. Norepinephrine infusion was adjusted to maintain MAP above 65 mmHg.                                                                                                      |           |        |        |          |         |    |    | 0.12       |           |
|    |                  | B | Norepinephrine: a MAP above 65 mmHg was achieved by adjusting the norepinephrine dosage.                                                                                                                                                      | NA        | NA     | 64±9   | NA       | 3.5±0.9 | NA | NA | 7.33 ± 0.1 | 7.6 ± 6.1 |
| 12 | Seguin P<br>2006 | A | Epinephrine: titrated from 0.2 µg/kg/min with 0.2 µg/kg/min increments every 3 minutes until MAP reached 70 to 80 mmHg.                                                                                                                       | NA        | 10 ± 4 | 52 ± 7 | 94 ± 18  | NA      | NA | NA | NA         | NA        |
|    |                  | B | Dopexamine/ Norepinephrine: titrated from 0.5 µg/kg/min with 0.5 µg/kg/min increments every 3 minutes for dopexamine and from 0.2 µg/kg/min with 0.2 µg/kg/min increments every 3 minutes for norepinephrine until MAP reached 70 to 80 mmHg. | NA        | 10 ± 3 | 56 ± 8 | 102 ± 17 | NA      | NA | NA | NA         | NA        |
| 13 | Schmoelz         | A | Dopexamine: titrated with 2                                                                                                                                                                                                                   | 19.50±6.9 | 11.40  | 85.70  | 87.9     | NA      | NA | NA | NA         | 2.42±1.   |

|    |                   |   |                                                                                                                                                                                                                                                                                                                                                                                                                                                   |                      |                     |                          |                           |                  |                   |                 |    |                     |
|----|-------------------|---|---------------------------------------------------------------------------------------------------------------------------------------------------------------------------------------------------------------------------------------------------------------------------------------------------------------------------------------------------------------------------------------------------------------------------------------------------|----------------------|---------------------|--------------------------|---------------------------|------------------|-------------------|-----------------|----|---------------------|
|    | M 2006            |   | $\mu\text{g/kg/min}$                                                                                                                                                                                                                                                                                                                                                                                                                              | 5                    | $\pm 3.73$          | $\pm 9.88$               | $5 \pm 2$<br>3.67         |                  |                   |                 |    | 31                  |
|    |                   | B | Dopamine: titrated with $3\mu\text{g/kg/min}$                                                                                                                                                                                                                                                                                                                                                                                                     | $20.38 \pm 7.8$<br>1 | 11.00<br>$\pm 3.80$ | 82.57<br>$\pm 13.7$<br>4 | 89.5<br>$2 \pm 1$<br>7.60 | NA               | NA                | NA              | NA | $1.92 \pm 1.$<br>53 |
|    |                   | C | Placebo: An equivalent volume of placebo was administered.                                                                                                                                                                                                                                                                                                                                                                                        | $23.40 \pm 7.2$<br>1 | 12.25<br>$\pm 3.82$ | 85.85<br>$\pm 13.3$<br>2 | 89.2<br>$0 \pm 2$<br>4.81 | NA               | NA                | NA              | NA | $2.55 \pm 2.$<br>16 |
| 14 | Lauzier F<br>2006 | A | Vasopressin: titrated with 0.04–0.20 U/min, which was infused to maintain a MAP above 70 mmHg.<br><br>Other vasopressive drugs were tapered and weaned as the experimental drug was increased.<br><br>When maximal dosage of the experimental drug was reached (0.20 U/min), administration of the other drug (either NE or AVP) was allowed as rescue therapy if the MAP was still below 70 mmHg. Dobutamine was used if cardiac index decreased | $22.8 \pm 3.4$       | $8.5 \pm 1.$<br>4   | $72 \pm 7$               | 118<br>$\pm 16$           | $4.6 \pm$<br>1.0 | $581 \pm 1$<br>24 | 148<br>$\pm 30$ | NA | $2.87 \pm 0.$<br>75 |

|    |                |   |                                                                                                                                                                                                                                                                                                                                                                                                                                                                                                                 |            |         |       |             |           |         |        |    |           |
|----|----------------|---|-----------------------------------------------------------------------------------------------------------------------------------------------------------------------------------------------------------------------------------------------------------------------------------------------------------------------------------------------------------------------------------------------------------------------------------------------------------------------------------------------------------------|------------|---------|-------|-------------|-----------|---------|--------|----|-----------|
|    |                |   | below 3 l/min/m <sup>2</sup> despite adequate volume resuscitation.                                                                                                                                                                                                                                                                                                                                                                                                                                             |            |         |       |             |           |         |        |    |           |
|    |                | B | Norepinephrine: titrated with 0.1–2.8 µg/kg/min, which was infused to maintain a MAP above 70 mmHg. Other vasopressive drugs were tapered and weaned as the experimental drug was increased. When maximal dosage of the experimental drug was reached (2.8 µg/kg/min), administration of the other drug (either NE or AVP) was allowed as rescue therapy if the MAP was still below 70 mmHg. Dobutamine was used if cardiac index decreased below 3 l/min/m <sup>2</sup> despite adequate volume resuscitation. | 23.5±4.2   | 9.3±1.4 | 68±10 | 109±23      | 4.4±1.4   | 537±143 | 157±42 | NA | 3.33±1.75 |
| 15 | Mathur SK 2007 | A | Dopamine: titrated with 10-25 mcg/kg/min, with 2.5 mcg/kg/min increments every 15 minutes.                                                                                                                                                                                                                                                                                                                                                                                                                      | 24.56±2.90 | NA      | NA    | 129.32±8.30 | 5.28±0.53 | NA      | NA     | NA | NA        |
|    |                | B | Norepinephrine: titrated with 0.5–                                                                                                                                                                                                                                                                                                                                                                                                                                                                              | 25.60±2.3  | NA      | NA    | 132.        | 5.45      | NA      | NA     | NA | NA        |

|    |                  |   |                                                                                                                                                                                                                                                                                                                                            |    |              |       |             |           |    |    |    |                  |
|----|------------------|---|--------------------------------------------------------------------------------------------------------------------------------------------------------------------------------------------------------------------------------------------------------------------------------------------------------------------------------------------|----|--------------|-------|-------------|-----------|----|----|----|------------------|
|    |                  |   | 2.5 mcg/kg/min, with 0.25 mcg/kg/min increments every 15 minutes.                                                                                                                                                                                                                                                                          | 1  |              |       | 12±<br>7.30 | ±0.5<br>7 |    |    |    |                  |
| 16 | Annane D<br>2007 | A | Epinephrine: epinephrine started at dose of 0.2 µg/kg/min with placebo. When CI > 2.5 l/min/m <sup>2</sup> , Norepinephrine or epinephrine raised by 0.2 µg/kg/min. When CI ≤ 2.5 l/min/m <sup>2</sup> , dobutamine or placebo raised by 5µg/kg/min. The aim was to raise MAP to 70 mm Hg.                                                 | NA | 11<br>(9,13) | 70±19 | NA          | NA        | NA | NA | NA | 2.9<br>(1.7,5.0) |
|    |                  | B | Norepinephrine/Dobutamine: norepinephrine started at a dose of 0.2 µg/kg/min, with dobutamine at a dose of 5 µg/kg/min. When CI > 2.5 l/min/m <sup>2</sup> , Norepinephrine or epinephrine raised by 0.2 µg/kg/min. When CI ≤ 2.5 l/min/m <sup>2</sup> , dobutamine or placebo raised by 5µg/kg/min. The aim was to raise MAP to 70 mm Hg. | NA | 11<br>(9,14) | 68±19 | NA          | NA        | NA | NA | NA | 3.3<br>(2.1,5.1) |

|    |                        |   |                                                                                                                                                                                                                        |          |    |               |                   |    |    |            |                   |         |
|----|------------------------|---|------------------------------------------------------------------------------------------------------------------------------------------------------------------------------------------------------------------------|----------|----|---------------|-------------------|----|----|------------|-------------------|---------|
| 17 | Myburgh<br><br>JA 2008 | A | Epinephrine: Blinded infusions of epinephrine to achieve a MAP C70 mmHg for the duration of ICU admission.                                                                                                             | 21.8±7.4 | NA | 68.5±<br>13.0 | 93.7<br>±22.<br>2 | NA | NA | NA         | 7.3±<br>0.1       | 2.7±2.4 |
|    |                        | B | Norepinephrine: Blinded infusions of norepinephrine to achieve a MAP C70 mmHg for the duration of ICU admission.                                                                                                       | 22.2±6.9 | NA | 68.7±<br>14.4 | 94.3<br>±21.<br>5 | NA | NA | NA         | 7.3±<br>0.3       | 2.5±2.3 |
| 18 | Morelli A<br><br>2008  | A | Norepinephrine: patients requiring norepinephrine doses of 0.9 mg/kg/min/ to maintain MAP at 70 (5) mm Hg, were randomized. Norepinephrine infusion was titrated to maintain the defined threshold MAP of 70 (5) mm Hg | NA       | NA | 73±4          | NA                | NA | NA | 166<br>±38 | 7.35<br>±0.0<br>7 | NA      |
|    |                        | B | Terlipressin/ norepinephrine: patients requiring norepinephrine doses of 0.9 mg/kg/min/ to maintain MAP at 70 (5) mm Hg, were randomized. Then the patients received a single bolus dose of terlipressin 1 mg.         | NA       | NA | 74±2          | NA                | NA | NA | 163<br>±42 | 7.37<br>±0.0<br>6 | NA      |

|    |                   |   |                                                                                                                                                                                                                                                                                                                                                                                                                                                                                                                                                  |    |    |      |    |    |              |             |                   |    |
|----|-------------------|---|--------------------------------------------------------------------------------------------------------------------------------------------------------------------------------------------------------------------------------------------------------------------------------------------------------------------------------------------------------------------------------------------------------------------------------------------------------------------------------------------------------------------------------------------------|----|----|------|----|----|--------------|-------------|-------------------|----|
|    |                   | C | <p>Terlipressin/ Dobutamine/</p> <p>Norepinephrine: patients requiring norepinephrine doses of 0.9 mg/kg/min/ to maintain MAP at 70 (5) mm Hg, were randomized.</p> <p>Patients was treated with a combination therapy consisting of a single bolus dose of terlipressin 1 mg and a titrated infusion of dobutamine. Dobutamine infusion was started immediately after terlipressin administration at a rate of 3 mg/kg/min and was progressively increased (in steps of 1–3 mg/kg/min). Dobutamine in doses up to 20 mg/kg/min was allowed.</p> | NA | NA | 72±3 | NA | NA | NA           | 155<br>±43  | 7.36<br>±0.1<br>0 | NA |
| 19 | Morelli A<br>2008 | A | <p>Phenylephrine: titrated to maintain a</p> <p>MAP between 65 and 75 mmHg. If the mixed-venous oxygen saturation</p>                                                                                                                                                                                                                                                                                                                                                                                                                            | NA | NA | NA   | NA | NA | 500 ±<br>205 | 164<br>± 48 | 7.37<br>±<br>0.07 | NA |

|  |  |   |                                                                                                                                                                                                                                                                                                                                                                                                                                          |    |    |    |    |    |               |              |                 |    |
|--|--|---|------------------------------------------------------------------------------------------------------------------------------------------------------------------------------------------------------------------------------------------------------------------------------------------------------------------------------------------------------------------------------------------------------------------------------------------|----|----|----|----|----|---------------|--------------|-----------------|----|
|  |  |   | <p>was &lt;65% despite appropriate arterial oxygenation (arterial oxygen saturation <math>\geq</math> 95%) and hemoglobin concentrations <math>\geq</math> 8 g/dl, dobutamine was administered (with a maximum dose of 20 <math>\mu</math>g/kg/min) to achieve mixed-venous oxygen saturation values <math>\geq</math> 65%.</p>                                                                                                          |    |    |    |    |    |               |              |                 |    |
|  |  | B | <p>Norepinephrine: titrated to maintain a MAP between 65 and 75 mmHg. If the mixed-venous oxygen saturation was &lt;65% despite appropriate arterial oxygenation (arterial oxygen saturation <math>\geq</math> 95%) and hemoglobin concentrations <math>\geq</math> 8 g/dl, dobutamine was administered (with a maximum dose of 20 <math>\mu</math>g/kg/min) to achieve mixed-venous oxygen saturation values <math>\geq</math> 65%.</p> | NA | NA | NA | NA | NA | 499 $\pm$ 139 | 173 $\pm$ 53 | 7.35 $\pm$ 0.09 | NA |



|    |                        |   |                                                                                                                                                                                                                                                                                                                                                                                                                                                                                                                                                                                                                                                                                |          |    |    |    |    |    |    |    |    |
|----|------------------------|---|--------------------------------------------------------------------------------------------------------------------------------------------------------------------------------------------------------------------------------------------------------------------------------------------------------------------------------------------------------------------------------------------------------------------------------------------------------------------------------------------------------------------------------------------------------------------------------------------------------------------------------------------------------------------------------|----------|----|----|----|----|----|----|----|----|
| 20 | Russell<br><br>JA 2008 | A | Norepinephrine: Vasopressin (30 U)<br><br>and norepinephrine (15 mg) were<br><br>mixed in identical 250-ml<br><br>intravenous bags of 5% dextrose in<br><br>water, with final concentrations<br><br>of 0.12 U of vasopressin per<br><br>milliliter and 60 µg of<br><br>norepinephrine per milliliter. The<br><br>study-drug infusion was started at 5<br><br>ml per hour and increased by 2.5 ml<br><br>per hour every 10 minutes during<br><br>the first hour to achieve a constant<br><br>target rate of 15 ml per hour. Thus,<br><br>the blinded norepinephrine infusion<br><br>was started at 5 µg per minute and<br><br>titrated to a maximum of 15 µg per<br><br>minute. | 27.1±6.9 | NA | NA | NA | NA | NA | NA | NA | NA |
|    |                        | B | Vasopressin: Vasopressin (30 U)<br><br>and norepinephrine (15 mg) were<br><br>mixed in identical 250-ml<br><br>intravenous bags of 5% dextrose in<br><br>water, with final concentrations                                                                                                                                                                                                                                                                                                                                                                                                                                                                                      | 27.0±7.7 | NA | NA | NA | NA | NA | NA | NA | NA |

|    |                   |   |                                                                                                                                                                                                                                                                                                                                                                                                      |    |    |      |        |         |    |    |    |         |
|----|-------------------|---|------------------------------------------------------------------------------------------------------------------------------------------------------------------------------------------------------------------------------------------------------------------------------------------------------------------------------------------------------------------------------------------------------|----|----|------|--------|---------|----|----|----|---------|
|    |                   |   | <p>of 0.12 U of vasopressin per milliliter and 60 µg of norepinephrine per milliliter. The study-drug infusion was started at 5 ml per hour and increased by 2.5 ml per hour every 10 minutes during the first hour to achieve a constant target rate of 15 ml per hour. Thus, the blinded vasopressin infusion was started at 0.01 U per minute and titrated to a maximum of 0.03 U per minute.</p> |    |    |      |        |         |    |    |    |         |
| 21 | Morelli A<br>2009 | A | <p>Terlipressin: 1.3µg/kg/h terlipressin continuous infusion plus open-label norepinephrine infusion to maintain MAP at 70±5 mm Hg.</p>                                                                                                                                                                                                                                                              | NA | NA | 53±6 | 95±16  | 4.0±1.0 | NA | NA | NA | 3.1±1.8 |
|    |                   | B | <p>Vasopressin: 0.03 U/min arginine vasopressin continuous infusion plus open-label norepinephrine infusion to maintain MAP at 70±5 mm Hg.</p>                                                                                                                                                                                                                                                       | NA | NA | 53±4 | 100±22 | 4.0±1.1 | NA | NA | NA | 3.0±2.4 |
|    |                   | C | <p>Norepinephrine: 15µg/min</p>                                                                                                                                                                                                                                                                                                                                                                      | NA | NA | 54±3 | 97±    | 4.0±    | NA | NA | NA | 3.1±2.2 |

|    |                           |   |                                                                                                                                                                                                                                                                                                                                                                                                                                                                                                                                    |        |    |    |    |     |    |    |    |    |
|----|---------------------------|---|------------------------------------------------------------------------------------------------------------------------------------------------------------------------------------------------------------------------------------------------------------------------------------------------------------------------------------------------------------------------------------------------------------------------------------------------------------------------------------------------------------------------------------|--------|----|----|----|-----|----|----|----|----|
|    |                           |   | norepinephrine continuous infusion<br><br>plus open-label norepinephrine<br><br>infusion to maintain MAP at 70±5<br><br>mm Hg.                                                                                                                                                                                                                                                                                                                                                                                                     |        |    |    | 21 | 1.0 |    |    |    |    |
| 22 | Alhashem<br><br>i JA 2009 | A | Levosimendan: study drugs were<br><br>titrated incrementally to an ScvO <sub>2</sub><br><br>≥70% with a preset maximum<br><br>dose, whichever was achieved first.<br><br>Patients received levosimendan<br><br>0.05 µg/kg/min intravenously,<br><br>which was increased by 0.05<br><br>µg/kg/min every 30 minutes<br><br>(maximum, 0.2 µg/kg/min) and was<br><br>continued for 24 hours only.<br><br>Hypotension (MAP<65 mm Hg)<br><br>was treated with norepinephrine<br><br>infusion, titrated to a MAP 65 mm<br><br>Hg or more. | 26 ± 7 | NA | NA | NA | NA  | NA | NA | NA | NA |
|    |                           | B | Dobutamine: study drugs were<br><br>titrated incrementally to an ScvO <sub>2</sub><br><br>≥70% with a preset maximum<br><br>dose, whichever was achieved first.                                                                                                                                                                                                                                                                                                                                                                    | 27 ± 7 | NA | NA | NA | NA  | NA | NA | NA | NA |

|    |                  |   |                                                                                                                                                                                                                                                                                                                                                                                                                                                                                                                 |           |         |             |             |                 |    |    |                 |               |
|----|------------------|---|-----------------------------------------------------------------------------------------------------------------------------------------------------------------------------------------------------------------------------------------------------------------------------------------------------------------------------------------------------------------------------------------------------------------------------------------------------------------------------------------------------------------|-----------|---------|-------------|-------------|-----------------|----|----|-----------------|---------------|
|    |                  |   | <p>Patients received dobutamine, 5 <math>\mu\text{g/kg/min}</math> intravenously, which was increased by 5 <math>\mu\text{g/kg/min}</math> every 30 minutes (maximum, 20 <math>\mu\text{g/kg/min}</math>) and was continued for a maximum of 7 days. Hypotension (<math>\text{MAP} &lt; 65</math> mm Hg) was treated with norepinephrine infusion, titrated to a MAP 65 mm Hg or more.</p>                                                                                                                      |           |         |             |             |                 |    |    |                 |               |
| 23 | De Backer D 2010 | A | <p>Dopamine: Doses of dopamine could be increased or decreased by 2 <math>\mu\text{g/kg/min}</math>. If the patient was still hypotensive after the maximum dose of agent had been administered (20 <math>\mu\text{g/kg/min}</math>), open-label norepinephrine was added. If the patient was already being treated with a vasopressor at baseline, that agent was replaced as soon as possible with the trial-drug solution.</p> <p>If the patient was already receiving dopamine and this agent could not</p> | 20(15,28) | 9(7,12) | 58 $\pm$ 13 | 97 $\pm$ 27 | 3.11 $\pm$ 1.35 | NA | NA | 7.32 $\pm$ 0.13 | 2.1(1.2, 4.3) |

|  |  |   |                                                                                                                                                                                                                                                                                                                                                                                                       |           |          |       |        |             |    |    |             |               |
|--|--|---|-------------------------------------------------------------------------------------------------------------------------------------------------------------------------------------------------------------------------------------------------------------------------------------------------------------------------------------------------------------------------------------------------------|-----------|----------|-------|--------|-------------|----|----|-------------|---------------|
|  |  |   | <p>be discontinued after introduction of the trial-drug solution, the dopamine was replaced with an open-label norepinephrine infusion.</p> <p>Open-label dopamine was not allowed at any time. Epinephrine and vasopressin were used only as rescue therapy. Inotropic agents could be used, if needed, to increase cardiac output.</p>                                                              |           |          |       |        |             |    |    |             |               |
|  |  | B | <p>Norepinephrine: Doses of norepinephrine could be increased or decreased by 0.02 µg/kg/min. If the patient was still hypotensive after the maximum dose of agent had been administered (0.19µg/kg/min), open-label norepinephrine was added. If the patient was already being treated with a vasopressor at baseline, that agent was replaced as soon as possible with the trial-drug solution.</p> | 20(14,27) | 9(6,12 ) | 58±13 | 95± 25 | 2.77 ±1.1 6 | NA | NA | 7.32 ±0.1 4 | 2.2(1.2, 3.8) |

|    |                  |   |                                                                                                                                                                                                                                                                                                                                                                                                          |                |            |                |                     |                   |    |    |    |               |
|----|------------------|---|----------------------------------------------------------------------------------------------------------------------------------------------------------------------------------------------------------------------------------------------------------------------------------------------------------------------------------------------------------------------------------------------------------|----------------|------------|----------------|---------------------|-------------------|----|----|----|---------------|
|    |                  |   | <p>If the patient was already receiving dopamine and this agent could not be discontinued after introduction of the trial-drug solution, the dopamine was replaced with an open-label norepinephrine infusion. Open-label dopamine was not allowed at any time. Epinephrine and vasopressin were used only as rescue therapy. Inotropic agents could be used, if needed, to increase cardiac output.</p> |                |            |                |                     |                   |    |    |    |               |
| 24 | Jain G<br>2010   | A | <p>Norepinephrine: titrated with 0.5-3.5 µg/kg/min, with 0.5 µg/kg/min increments every 30 minutes.</p>                                                                                                                                                                                                                                                                                                  | 17.66±3.4<br>3 | NA         | 47.55<br>±4.30 | 151.<br>74±<br>7.62 | 4.97<br>±0.3<br>0 | NA | NA | NA | 3.40±0.<br>74 |
|    |                  | B | <p>Phenylephrine: titrated with 0.5-8.5 µg/kg/min, with 1 µg/kg/min increments every 30 minutes.</p>                                                                                                                                                                                                                                                                                                     | 19.11±3.1<br>1 | NA         | 48.96<br>±3.36 | 152.<br>66±<br>7.28 | 5.02<br>±0.5<br>6 | NA | NA | NA | 3.44±0.<br>64 |
| 25 | Patel GP<br>2010 | A | <p>Dopamine: Patients received dopamine (5-20 mcg/kg/min) as the first-line vasopressor therapy. If the predetermined maximum dose was</p>                                                                                                                                                                                                                                                               | 28±6.7         | 12±3.<br>3 | NA             | NA                  | NA                | NA | NA | NA | NA            |

|  |  |   |                                                                                                                                                                                                                                                                                                                                                                                                                                                                                                                                                            |         |            |    |    |    |    |    |    |    |
|--|--|---|------------------------------------------------------------------------------------------------------------------------------------------------------------------------------------------------------------------------------------------------------------------------------------------------------------------------------------------------------------------------------------------------------------------------------------------------------------------------------------------------------------------------------------------------------------|---------|------------|----|----|----|----|----|----|----|
|  |  |   | <p>reached for the initial vasopressor,</p> <p>then the addition of vasopressin at a</p> <p>continuous infusion dose (0.04</p> <p>U/min) was initiated. Patients who</p> <p>required additional hemodynamic</p> <p>support to meet the goals were then</p> <p>started on an infusion of</p> <p>phenylephrine (25-200 mcg/min),</p> <p>which was titrated to reach the goal</p> <p>hemodynamic parameters. Those</p> <p>patients who were found to have a</p> <p>low central venous oxygen</p> <p>saturation (ScvO2 G70%) were</p> <p>given dobutamine.</p> |         |            |    |    |    |    |    |    |    |
|  |  | B | <p>Norepinephrine: Patients received</p> <p>norepinephrine (5-20 mcg/min) as</p> <p>the first-line vasopressor therapy. If</p> <p>the predetermined maximum dose</p> <p>was reached for the initial</p> <p>vasopressor, then the addition of</p> <p>vasopressin at a continuous infusion</p> <p>dose (0.04 U/min) was initiated.</p>                                                                                                                                                                                                                       | 27± 6.1 | 12±3.<br>2 | NA | NA | NA | NA | NA | NA | NA |

|    |                   |   |                                                                                                                                                                                                                                                                                                                                           |    |    |                   |                     |                      |                      |                          |                                 |                  |
|----|-------------------|---|-------------------------------------------------------------------------------------------------------------------------------------------------------------------------------------------------------------------------------------------------------------------------------------------------------------------------------------------|----|----|-------------------|---------------------|----------------------|----------------------|--------------------------|---------------------------------|------------------|
|    |                   |   | <p>Patients who required additional hemodynamic support to meet the goals were then started on an infusion of phenylephrine (25-200 mcg/min), which was titrated to reach the goal hemodynamic parameters. Those patients who were found to have a low central venous oxygen saturation (ScvO<sub>2</sub> 70%) were given dobutamine.</p> |    |    |                   |                     |                      |                      |                          |                                 |                  |
| 26 | Morelli A<br>2010 | A | Levosimendan:                                                                                                                                                                                                                                                                                                                             | NA | NA | 70<br>(67,<br>72) | 96<br>(87,<br>107)  | 3.6<br>(2.9,<br>4.3) | 431<br>(363,5<br>31) | 111<br>(93,<br>151)      | 7.29<br>(7.2<br>5,7.<br>34)     | NA               |
|    |                   | B | Dobutamine                                                                                                                                                                                                                                                                                                                                | NA | NA | 72<br>(70,74<br>) | 95<br>(90,<br>106)  | 3.9<br>(2.9,<br>4.6) | 492<br>(393,5<br>50) | 126<br>(112<br>,153<br>) | 7.28<br>(7.2<br>5,<br>7.38<br>) | NA               |
| 27 | Morelli A<br>2011 | A | Terlipressin                                                                                                                                                                                                                                                                                                                              | NA | NA | 71<br>(68,75<br>) | 104<br>(86,<br>113) | 3.8<br>(3.1,<br>5.4) | 437<br>(391,6<br>04) | NA                       | 7.30<br>(7.2<br>4,7.            | 1.8<br>(1.2,2.9) |



|    |                    |   |                             |                |               |                   |                     |                      |                      |    |                             |                  |
|----|--------------------|---|-----------------------------|----------------|---------------|-------------------|---------------------|----------------------|----------------------|----|-----------------------------|------------------|
|    |                    |   |                             |                |               |                   |                     |                      |                      |    | 34)                         |                  |
|    |                    | B | Arginine vasopressin        | NA             | NA            | 72<br>(69,75<br>) | 99<br>(83,<br>119)  | 4.0<br>(3.2,<br>4.9) | 460<br>(396,6<br>77) | NA | 7.31<br>(7.2<br>7,7.<br>37) | 2.3<br>(1.4,3.6) |
|    |                    | C | Control                     | NA             | NA            | 71<br>(68,75<br>) | 104<br>(86,<br>111) | 4.0<br>(3.5,<br>4.6) | 470<br>(399,5<br>50) | NA | 7.31<br>(7.2<br>8,7.<br>36) | 2.5<br>(1.9,3.0) |
| 28 | Han XD<br>2012     | A | Norepinephrine              | 26.89±7.5<br>2 | 8.68±<br>3.74 | NA                | NA                  | NA                   | NA                   | NA | NA                          | 3.75±2.<br>07    |
|    |                    | B | Pituitrin                   | 27.83±8.9<br>5 | 8.94±<br>4.28 | NA                | NA                  | NA                   | NA                   | NA | NA                          | 4.33±2.<br>24    |
| 29 | Mahmoud<br>KM 2012 | A | Norepinephrine/ Dobutamine  | NA             | 15.2 ±<br>2.4 | 52 ± 5            | 102<br>± 6          | 2.10<br>±<br>1.1     | NA                   | NA | 7.16<br>±<br>0.36           | 2.88 ±<br>0.49   |
|    |                    | B | Norepinephrine/ Epinephrine | NA             | 14.4 ±<br>2.9 | 54 ± 4            | 103<br>± 7          | 2.15<br>±<br>1.0     | NA                   | NA | 7.17<br>±<br>0.36           | 2.91 ±<br>0.29   |
| 30 | Memis D<br>2012    | A | Dobutamine                  | NA             | NA            | 62.07<br>± 1.62   | NA                  | NA                   | NA                   | NA | NA                          | NA               |
|    |                    | B | Levosimendan                | NA             | NA            | 63.07             | NA                  | NA                   | NA                   | NA | NA                          | NA               |

|    |                   |   |                |                |                   |                         |                          |                  |    |    |                       |                  |
|----|-------------------|---|----------------|----------------|-------------------|-------------------------|--------------------------|------------------|----|----|-----------------------|------------------|
|    |                   |   |                |                |                   | $\pm 1.33$              |                          |                  |    |    |                       |                  |
| 31 | Mehta S<br>2013   | A | Vasopressin    | 28.1 $\pm$ 8.0 | NA                | 72.0(6<br>7.0,77.<br>0) | NA                       | NA               | NA | NA | 7.34<br>(7.3,<br>7.4) | 2.3(1.5,<br>3.6) |
|    |                   | B | Norepinephrine | 29.2 $\pm$ 7.3 | NA                | 70.0(6<br>5.0,75.<br>0) | NA                       | NA               | NA | NA | 7.36<br>(7.3,<br>7.4) | 2.2(1.6,<br>4.1) |
| 32 | Hua F<br>2013     | A | Terlipressin   | 19.3 $\pm$ 9.6 | NA                | NA                      | NA                       | NA               | NA | NA | NA                    | NA               |
|    |                   | B | Dopamine       | 17.6 $\pm$ 5.3 | NA                | NA                      | NA                       | NA               | NA | NA | NA                    | NA               |
| 33 | Fang MX<br>2014   | A | Dobutamine     | 24.1 $\pm$ 2.1 | 19.0 $\pm$<br>1.4 | 67.6 $\pm$<br>12.3      | 115.<br>4 $\pm$ 1<br>2.1 | 3.4 $\pm$<br>0.6 | NA | NA | NA                    | 5.3 $\pm$ 0.8    |
|    |                   | B | Levosimendan   | 23.5 $\pm$ 2.4 | 17.0 $\pm$<br>1.1 | 68.3 $\pm$<br>13.2      | 118.<br>2 $\pm$ 1<br>4.3 | 3.2 $\pm$<br>0.6 | NA | NA | NA                    | 5.1 $\pm$ 0.9    |
| 34 | Torraco A<br>2014 | A | Levosimendan   | NA             | NA                | 70<br>(70,70<br>)       | 108<br>(95,<br>112)      | NA               | NA | NA | NA                    | NA               |
|    |                   | B | Control        | NA             | NA                | 70<br>(67,70<br>)       | 101<br>(93,<br>114)      | NA               | NA | NA | NA                    | NA               |
| 35 | Gordon            | A | Vasopressin    | 24 (19,30)     | NA                | 71                      | 98                       | NA               | NA | NA | NA                    | 2.1              |

|    |                       |   |                             |            |                 |                   |                           |                      |                    |                            |                           |                  |
|----|-----------------------|---|-----------------------------|------------|-----------------|-------------------|---------------------------|----------------------|--------------------|----------------------------|---------------------------|------------------|
|    | AC 2016               |   |                             |            |                 | (62,80<br>)       | (85,<br>109)              |                      |                    |                            |                           | (1.4,4.3)        |
|    |                       | B | Norepinephrine              | 24 (20,30) | NA              | 68<br>(61,75<br>) | 99<br>(83,<br>112)        | NA                   | NA                 | NA                         | NA                        | 2.6<br>(1.4,4.5) |
| 36 | Xiao XD<br><br>2016   | A | Norepinephrine              | NA         | NA              | NA                | NA                        | NA                   | NA                 | NA                         | 7.32<br><br>±0.1<br><br>6 | 3.6 ±3.2         |
|    |                       | B | Terlipressin/Norepinephrine | NA         | NA              | NA                | NA                        | NA                   | NA                 | NA                         | 7.30<br><br>±0.1<br><br>4 | 3.2 ±1.8         |
| 37 | Gordon<br><br>AC 2016 | A | Levosimendan                | 25 (21,31) | 10<br>(8,12)    | 74<br>(68,80<br>) | 97<br>(82,<br>111)        | 2.7<br>(2.2,<br>3.7) | NA                 | NA                         | NA                        | 2.2<br>(1.4,3.5) |
|    |                       | B | Placebo                     | 25 (21,30) | 10<br>(7,12)    | 73<br>(67,79<br>) | 94<br>(80,<br>110)        | 3.3<br>(2.2,<br>4.0) | NA                 | NA                         | NA                        | 2.3<br>(1.5,3.9) |
| 38 | Meng JB<br><br>2016   | A | Levosimendan                | 18.4±4.5   | 4.2±1.<br><br>8 | 67.6±<br><br>2.0  | 116.<br><br>1±7.<br><br>5 | 3.0±<br><br>0.2      | 716.8<br><br>±56.2 | 123.<br><br>2±1<br><br>6.9 | NA                        | 5.1±1.2          |
|    |                       | B | Dobutamine                  | 19.5±4.3   | 4.3±2.<br><br>6 | 67.4±<br><br>2.1  | 113.<br><br>8±6.          | 2.9±<br><br>0.3      | 725.5<br><br>±58.7 | 125.<br><br>6±1            | NA                        | 4.7±1.1          |

|    |                        |   |                |          |                    |                    |                                      |                             |     |      |                           |          |
|----|------------------------|---|----------------|----------|--------------------|--------------------|--------------------------------------|-----------------------------|-----|------|---------------------------|----------|
|    |                        |   |                |          |                    |                    | 9                                    |                             |     | 3.4  |                           |          |
| 39 | Barzegar<br><br>E 2016 | A | norepinephrine | NA       | 12±2.<br><br>6     | 62.2±<br><br>6.5   | 87.2<br><br>±18                      | NA                          | NA  | NA   | 7.32<br><br>±<br><br>0.07 | 2.0±1.1  |
|    |                        | B | vasopressin    | NA       | 11±3.<br><br>3     | 65.4±<br><br>6.4   | 90.2<br><br>±19.<br><br>2            | NA                          | NA  | NA   | 7.3<br><br>±<br><br>0.1   | 2.3±1.0  |
| 40 | Choudhur<br>y A 2017   | A | Terlipressin   | NA       | 13.74<br><br>±3.07 | 60.67<br><br>±2.79 | 104.<br><br>86±<br><br>16.3<br><br>2 | NA                          | NA  | NA   | NA                        | 3        |
|    |                        | B | Noradrenaline  | NA       | 14.78<br><br>±2.66 | 60.29<br><br>±3.05 | 104.<br><br>69±<br><br>17.7<br><br>2 | NA                          | NA  | NA   | NA                        | 3        |
| 41 | Chen Z<br><br>2017     | A | norepinephrine | 20.8±5.7 | NA                 | 53.8±<br><br>3.6   | 108.<br><br>5±1<br><br>2.6           | 55.1<br><br>8±1<br><br>1.84 | NA  | NA   | NA                        | NA       |
|    |                        | B | terlipressin   | 23.1±5.2 | NA                 | 55.1±<br><br>4.1   | 103.<br><br>5±1<br><br>1.5           | 57.0<br><br>1±1<br><br>2.50 | NA  | NA   | NA                        | NA       |
| 42 | Hajjej Z               | A | Control        | NA       | NA                 | 73                 | 92                                   | 3.5(                        | 452 | 143( | 7.4(                      | 1.7(1.4, |

|    |         |   |              |    |    |                   |                     |              |                      |                     |                            |                  |
|----|---------|---|--------------|----|----|-------------------|---------------------|--------------|----------------------|---------------------|----------------------------|------------------|
|    | 2017    |   |              |    |    | (62,86<br>)       | (84,<br>102)        | 3.2,<br>4.4) | (387,5<br>32)        | 87,2<br>12)         | 7.38<br>,7.4<br>2)         | 2.2)             |
|    |         | B | Levosimendan | NA | NA | 74<br>(60,84<br>) | 102<br>(80,<br>110) | 4(3,<br>4.6) | 546<br>(497–<br>646) | 151(<br>71,2<br>31) | 7.4(<br>7.38<br>,7.4<br>4) | 2.1(1.7,<br>2.8) |
| 43 | Russell | A | Selepressin  | NA | NA | NA                | NA                  | NA           | NA                   | NA                  | NA                         | NA               |
|    | JA 2017 | B | Placebo      | NA | NA | NA                | NA                  | NA           | NA                   | NA                  | NA                         | NA               |

**Table S2 Assessment of risk of bias**

| Study              | Random<br>sequence<br>generation | Allocation<br>concealment | Blinding of<br>participants<br>and personnel | Blinding of<br>outcome<br>assessment | Incomplete<br>outcome data | Selective<br>reporting | Other<br>bias |
|--------------------|----------------------------------|---------------------------|----------------------------------------------|--------------------------------------|----------------------------|------------------------|---------------|
| Martin C 1993      | low                              | low                       | low                                          | low                                  | low                        | low                    | low           |
| Marik PE<br>1994   | low                              | unclear                   | unclear                                      | unclear                              | unclear                    | unclear                | unclear       |
| Levy B 1997        | low                              | unclear                   | unclear                                      | unclear                              | unclear                    | unclear                | unclear       |
| Malay MB<br>1999   | low                              | low                       | unclear                                      | unclear                              | unclear                    | low                    | low           |
| Kern H 2001        | low                              | low                       | low                                          | low                                  | low                        | low                    | low           |
| Seguin P 2002      | unclear                          | unclear                   | unclear                                      | unclear                              | unclear                    | unclear                | unclear       |
| Patel BM<br>2002   | low                              | low                       | low                                          | low                                  | low                        | low                    | low           |
| Dünser MW<br>2003  | unclear                          | unclear                   | unclear                                      | unclear                              | unclear                    | unclear                | unclear       |
| Morelli A<br>2005  | low                              | unclear                   | unclear                                      | unclear                              | unclear                    | unclear                | unclear       |
| Albanèse J<br>2005 | low                              | unclear                   | unclear                                      | unclear                              | unclear                    | unclear                | unclear       |
| Luckner G<br>2006  | low                              | high                      | high                                         | high                                 | unclear                    | unclear                | unclear       |

|               |         |         |         |         |         |         |         |
|---------------|---------|---------|---------|---------|---------|---------|---------|
| Seguin P 2006 | unclear | unclear | unclear | unclear | unclear | unclear | unclear |
| Schmoelz M    | low     | low     | low     | low     | low     | low     | low     |
| 2006          |         |         |         |         |         |         |         |
| Lauzier F     | low     | low     | low     | low     | low     | low     | low     |
| 2006          |         |         |         |         |         |         |         |
| Mathur SK     | unclear | high    | high    | high    | unclear | unclear | unclear |
| 2007          |         |         |         |         |         |         |         |
| Annan D       | low     | low     | low     | low     | low     | low     | low     |
| 2007          |         |         |         |         |         |         |         |
| Myburgh JA    | low     | low     | low     | low     | low     | low     | low     |
| 2008          |         |         |         |         |         |         |         |
| Morelli A     | low     | low     | unclear | unclear | low     | low     | low     |
| 2008          |         |         |         |         |         |         |         |
| Morelli A     | low     | low     | unclear | unclear | low     | low     | low     |
| 2008          |         |         |         |         |         |         |         |
| Russell JA    | low     | low     | low     | low     | low     | low     | low     |
| 2008          |         |         |         |         |         |         |         |
| Morelli A     | low     | low     | low     | low     | low     | low     | low     |
| 2009          |         |         |         |         |         |         |         |
| Alhashemi JA  | unclear | unclear | unclear | unclear | unclear | unclear | unclear |
| 2009          |         |         |         |         |         |         |         |

|               |         |         |         |         |         |         |         |
|---------------|---------|---------|---------|---------|---------|---------|---------|
| De Backer D   | low     | low     | low     | low     | low     | low     | low     |
| 2010          |         |         |         |         |         |         |         |
| Jain G 2010   | low     | high    | high    | low     | unclear | unclear | unclear |
| Patel GP 2010 | low     | low     | unclear | unclear | low     | low     | low     |
| Morelli A     | low     | low     | low     | low     | low     | low     | low     |
| 2010          |         |         |         |         |         |         |         |
| Morelli A     | low     | low     | low     | low     | low     | low     | low     |
| 2011          |         |         |         |         |         |         |         |
| Han 2012      | unclear | unclear | unclear | unclear | unclear | unclear | unclear |
| Mahmoud KM    | low     | low     | low     | low     | low     | low     | low     |
| 2012          |         |         |         |         |         |         |         |
| Memis D 2012  | unclear | unclear | unclear | unclear | unclear | unclear | unclear |
| Mehta S       | low     | low     | low     | low     | low     | low     | low     |
| 2013          |         |         |         |         |         |         |         |
| Hua F 2013    | low     | low     | unclear | unclear | low     | low     | low     |
| Fang MX       | low     | high    | high    | high    | low     | low     | low     |
| 2014          |         |         |         |         |         |         |         |
| Torraco A     | low     | unclear | high    | high    | low     | low     | low     |
| 2014          |         |         |         |         |         |         |         |
| Gordon AC     | low     | low     | low     | low     | low     | low     | low     |
| 2016          |         |         |         |         |         |         |         |
| Xiao XD 2016  | low     | unclear | high    | high    | low     | low     | low     |



|               |     |         |      |      |     |     |     |
|---------------|-----|---------|------|------|-----|-----|-----|
| Gordon AC     | low | low     | low  | low  | low | low | low |
| 2016          |     |         |      |      |     |     |     |
| Meng JB 2016  | low | unclear | high | high | low | low | low |
| Barzegar E    | low | unclear | high | high | low | low | low |
| 2016          |     |         |      |      |     |     |     |
| Choudhury A   | low | low     | low  | low  | low | low | low |
| 2017          |     |         |      |      |     |     |     |
| Chen Z 2017   | low | high    | high | high | low | low | low |
| Hajjej Z 2017 | low | high    | high | high | low | low | low |
| Russell JA    | low | low     | low  | low  | low | low | low |
| 2017          |     |         |      |      |     |     |     |

---

Supplementary Figure S1 Forest plot for 28-day mortality

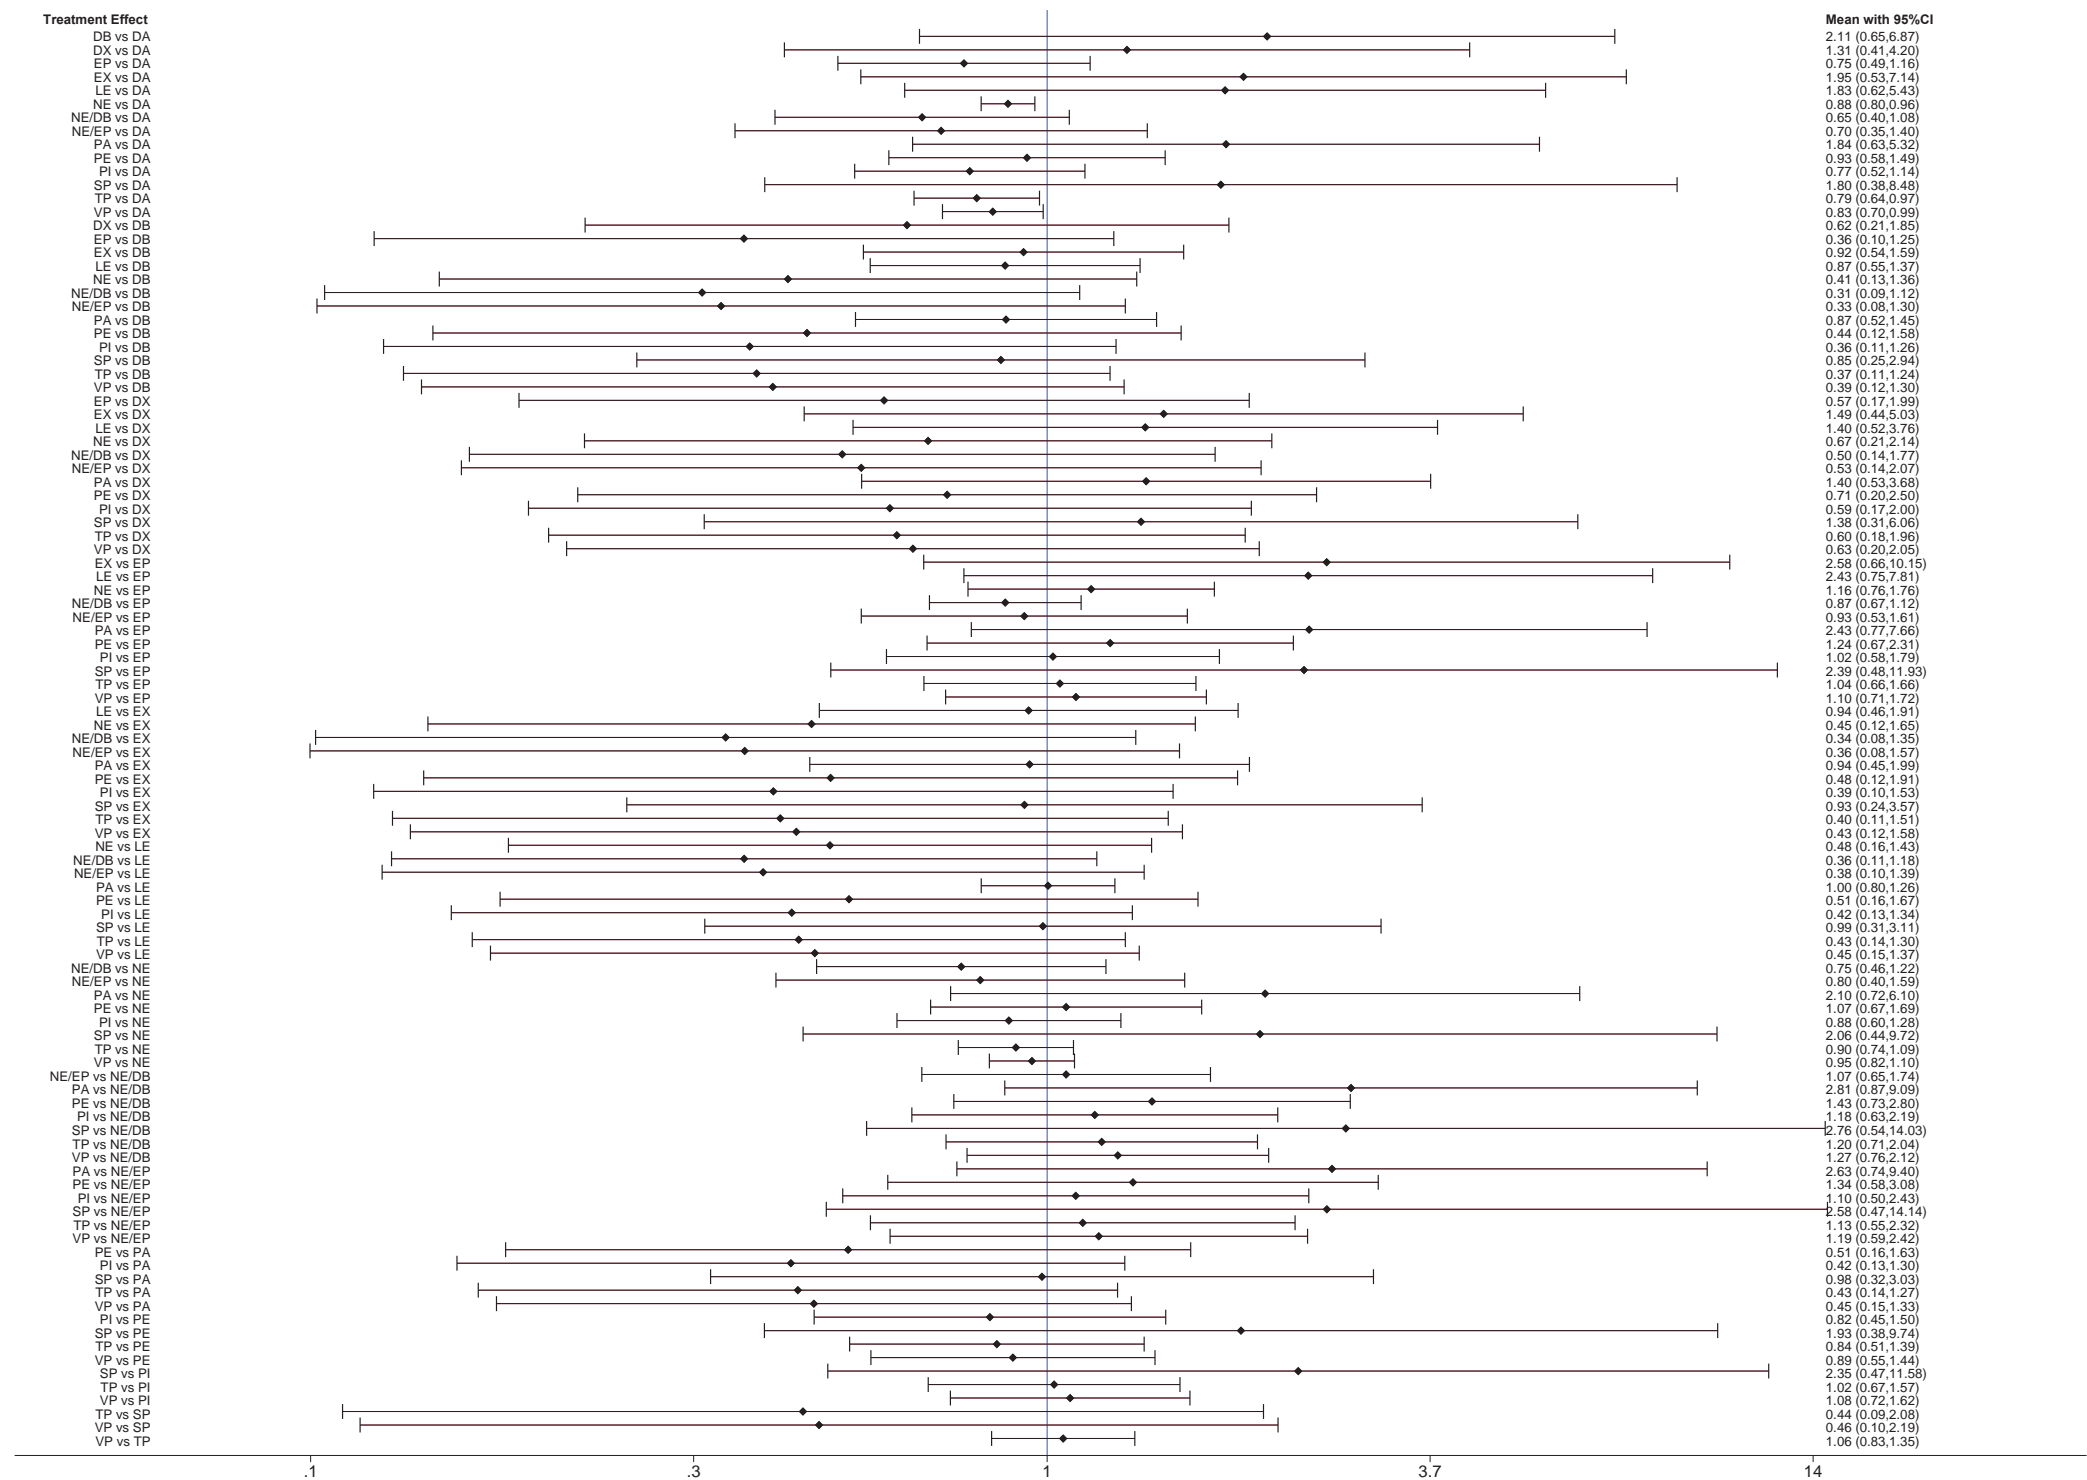

Supplementary Figure S2 Contribution plot for 28-day mortality

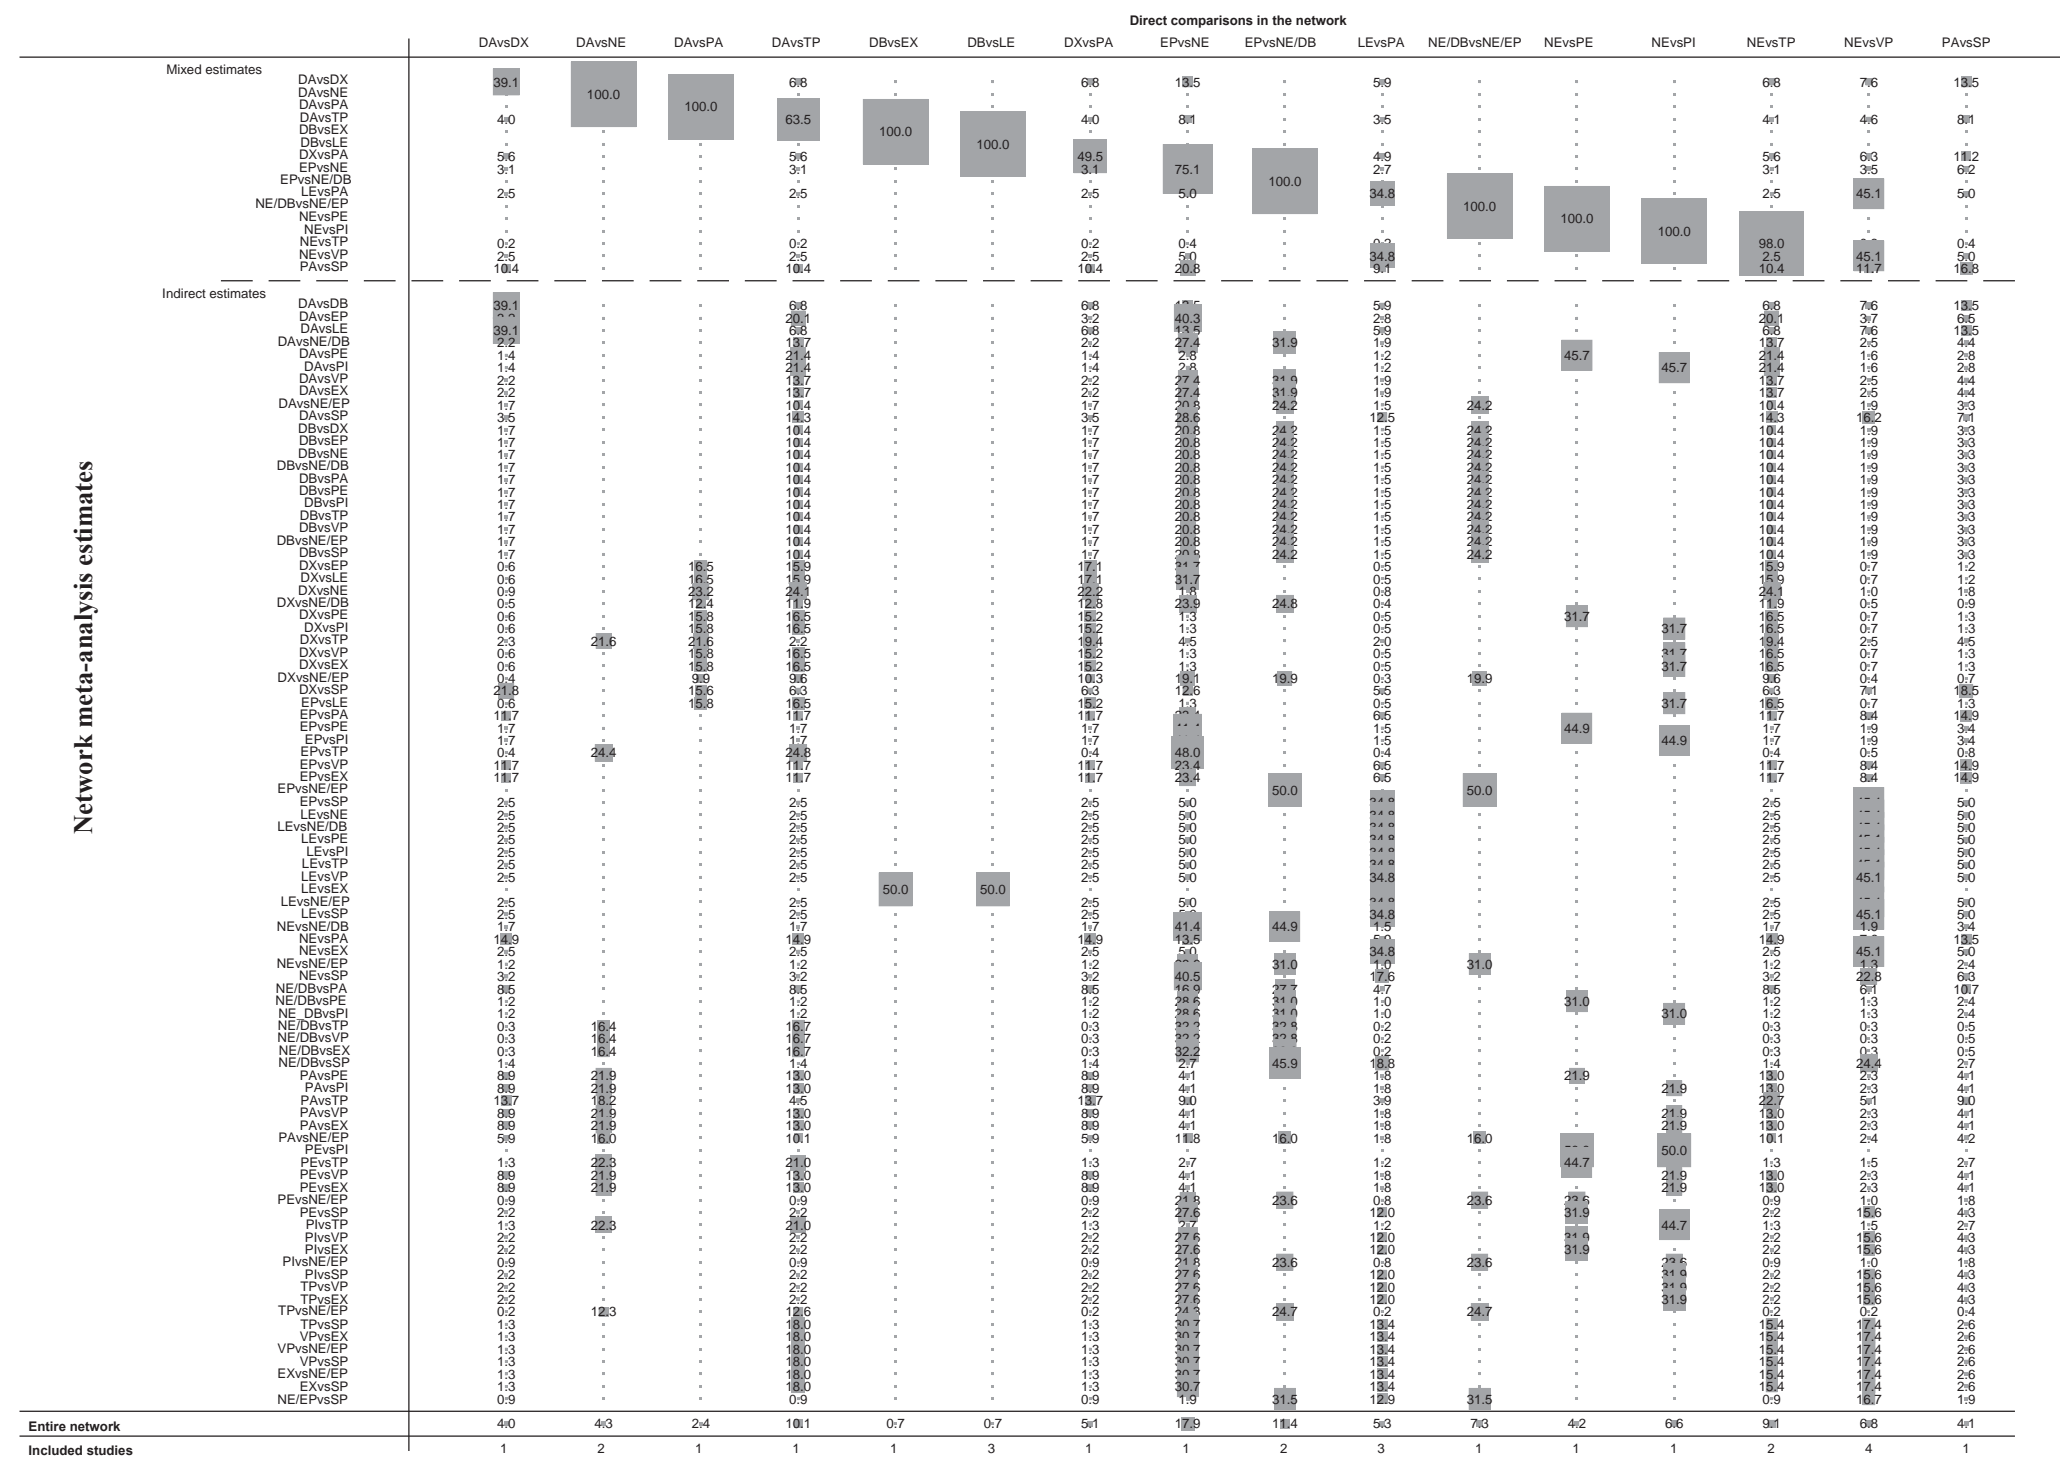

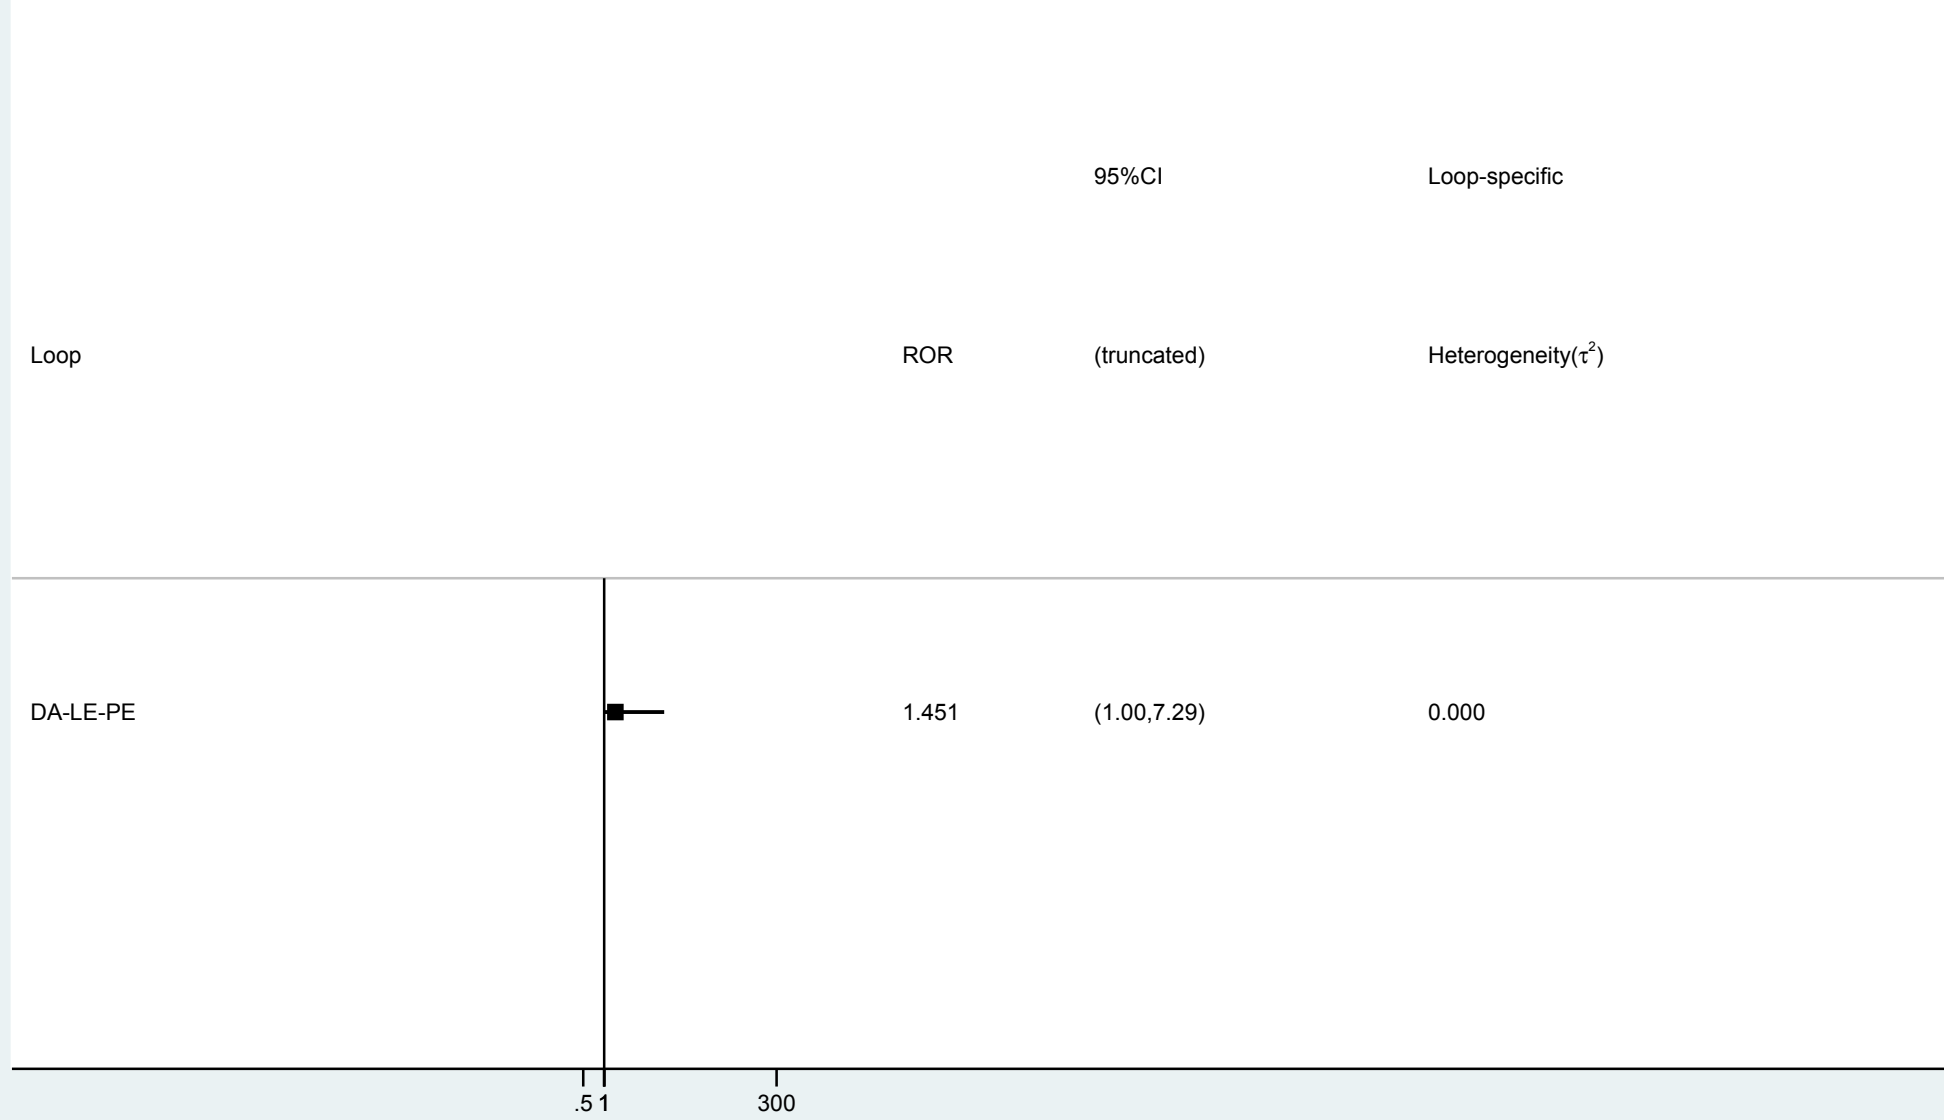

\*\*\* Loop(s) [DA-DX-NE/DB] are formed only by multi-arm trial(s) - Consistent by definition

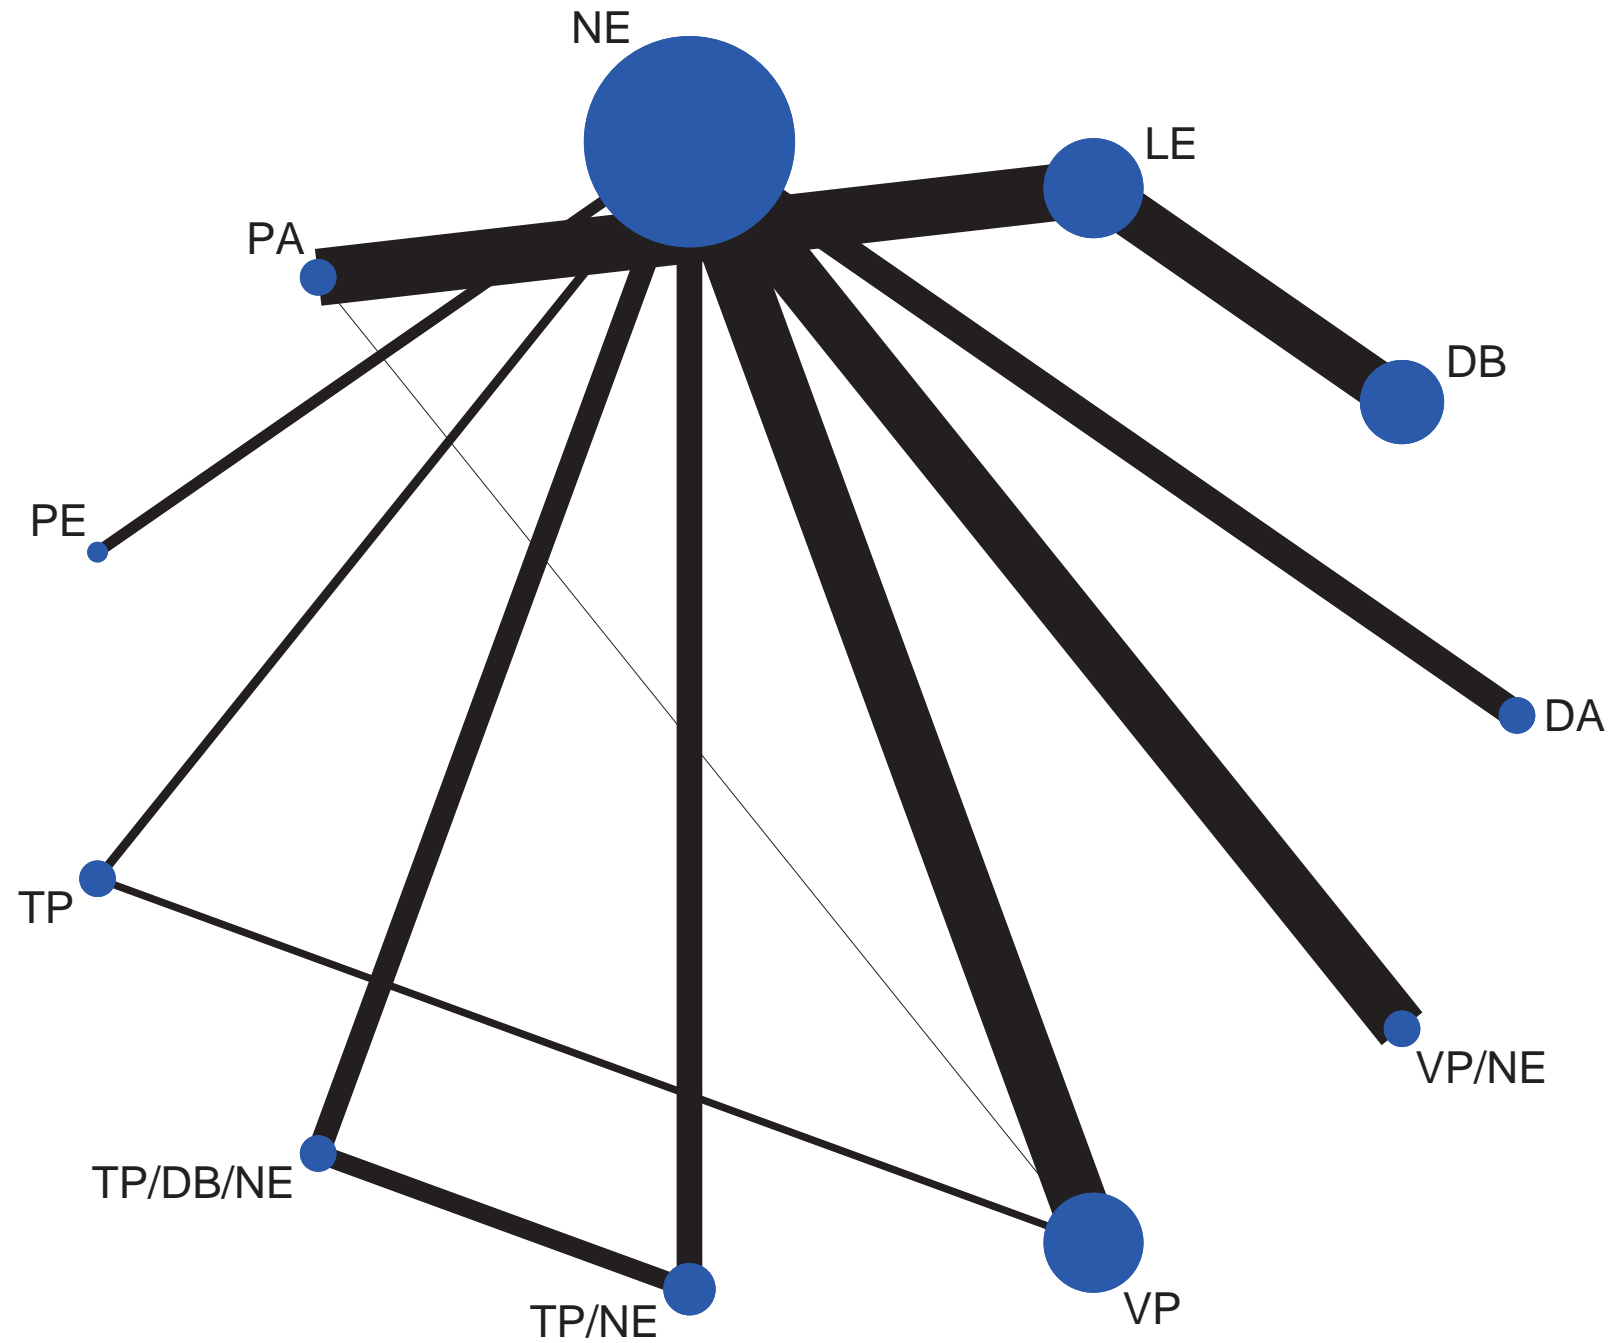

Supplementary Figure S5 SUCRA for ICU mortality

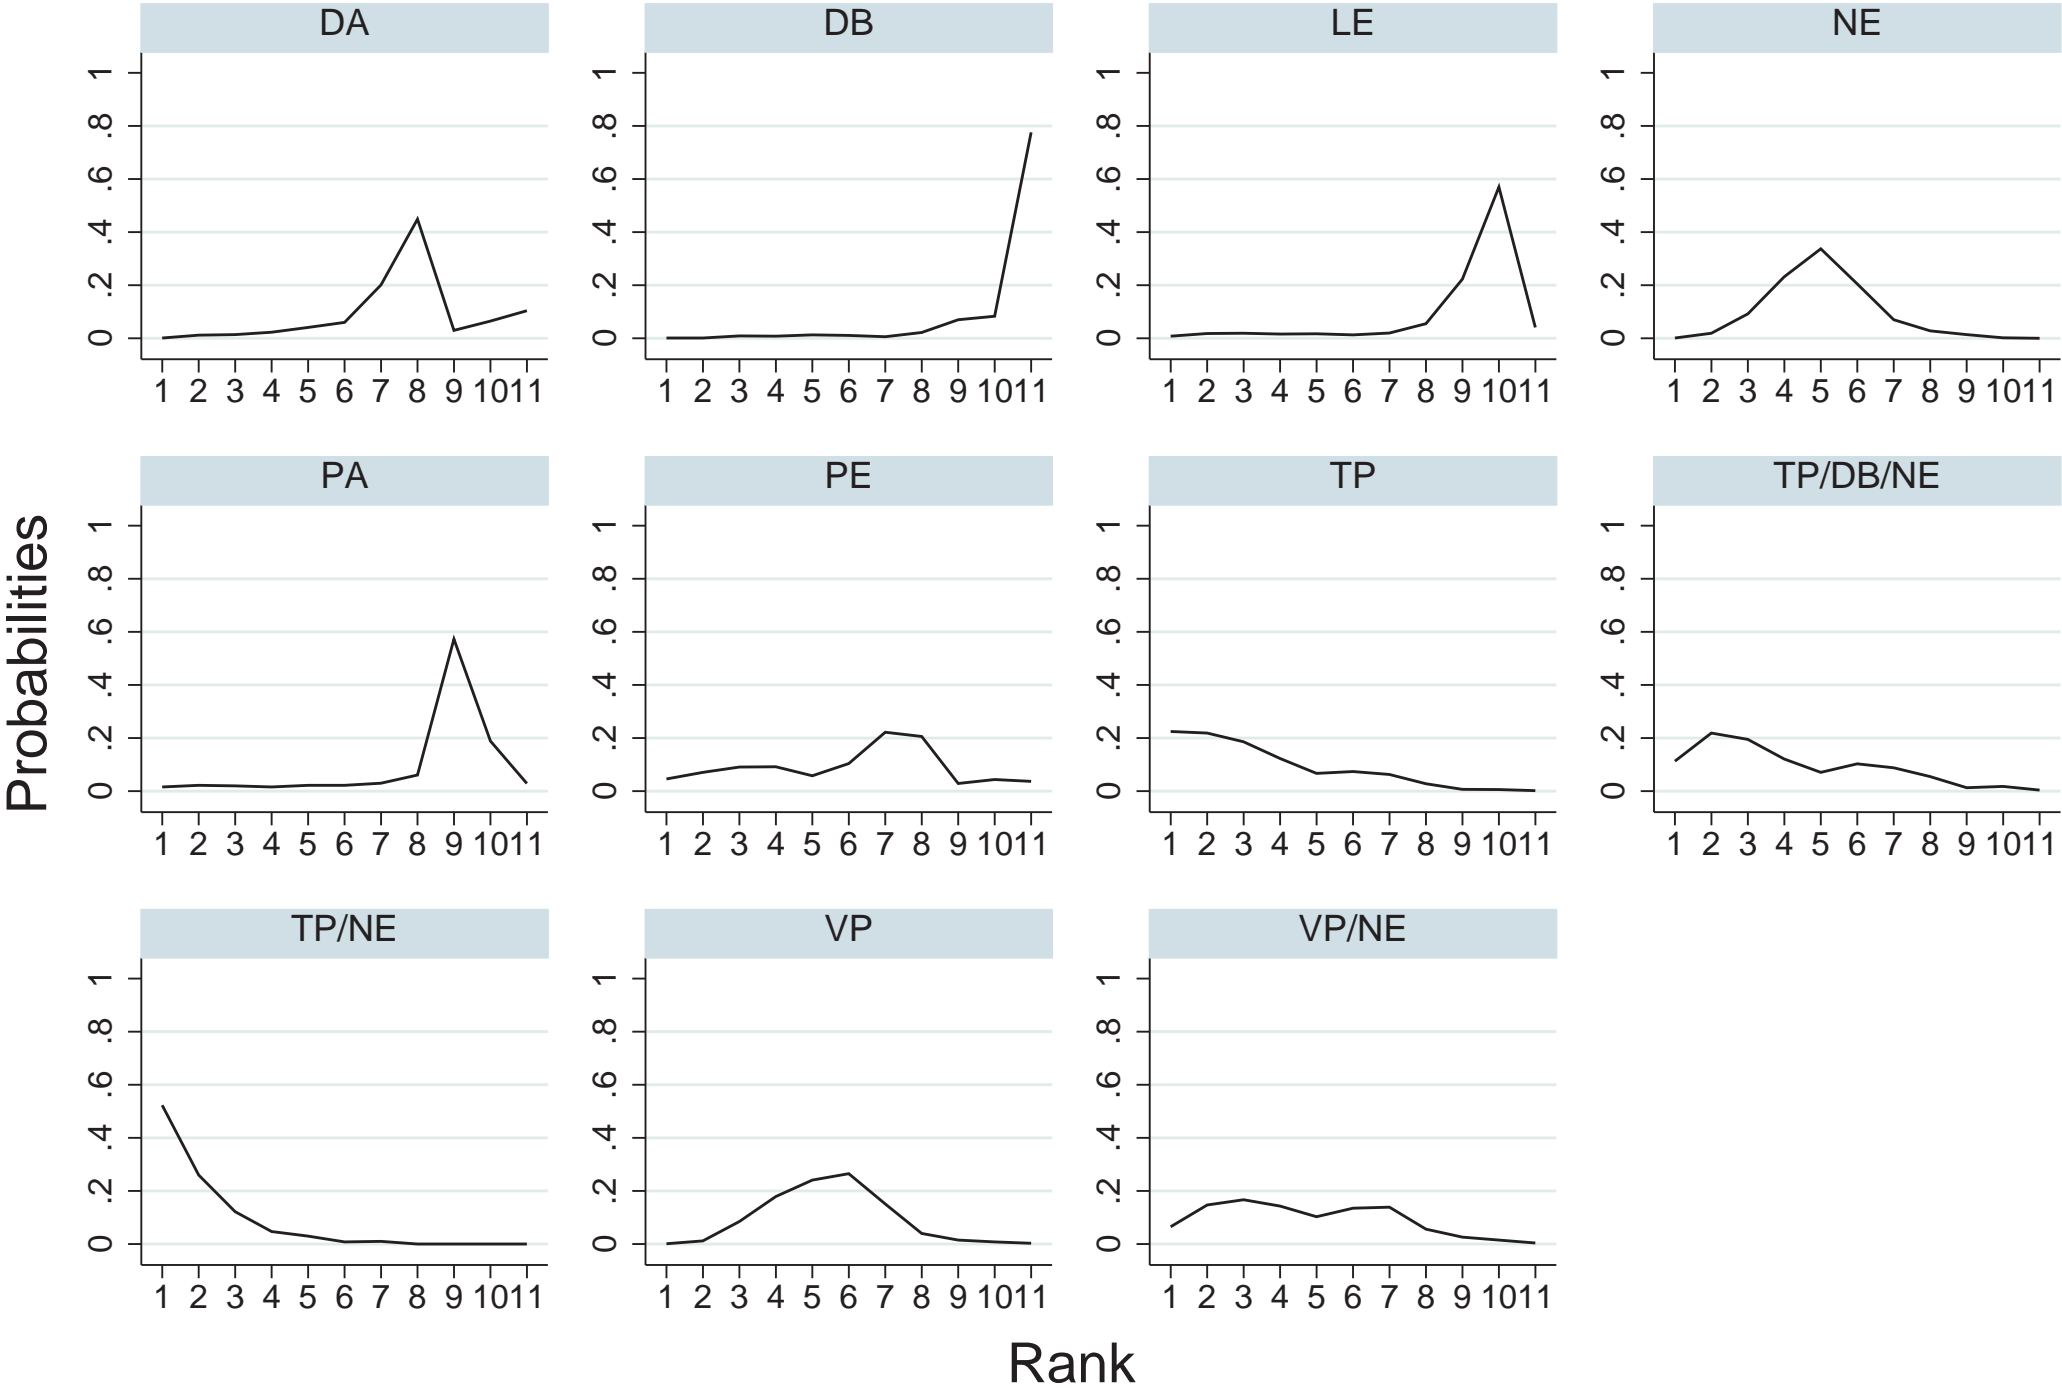

Supplementary Figure S6 Forest plot for ICU mortality

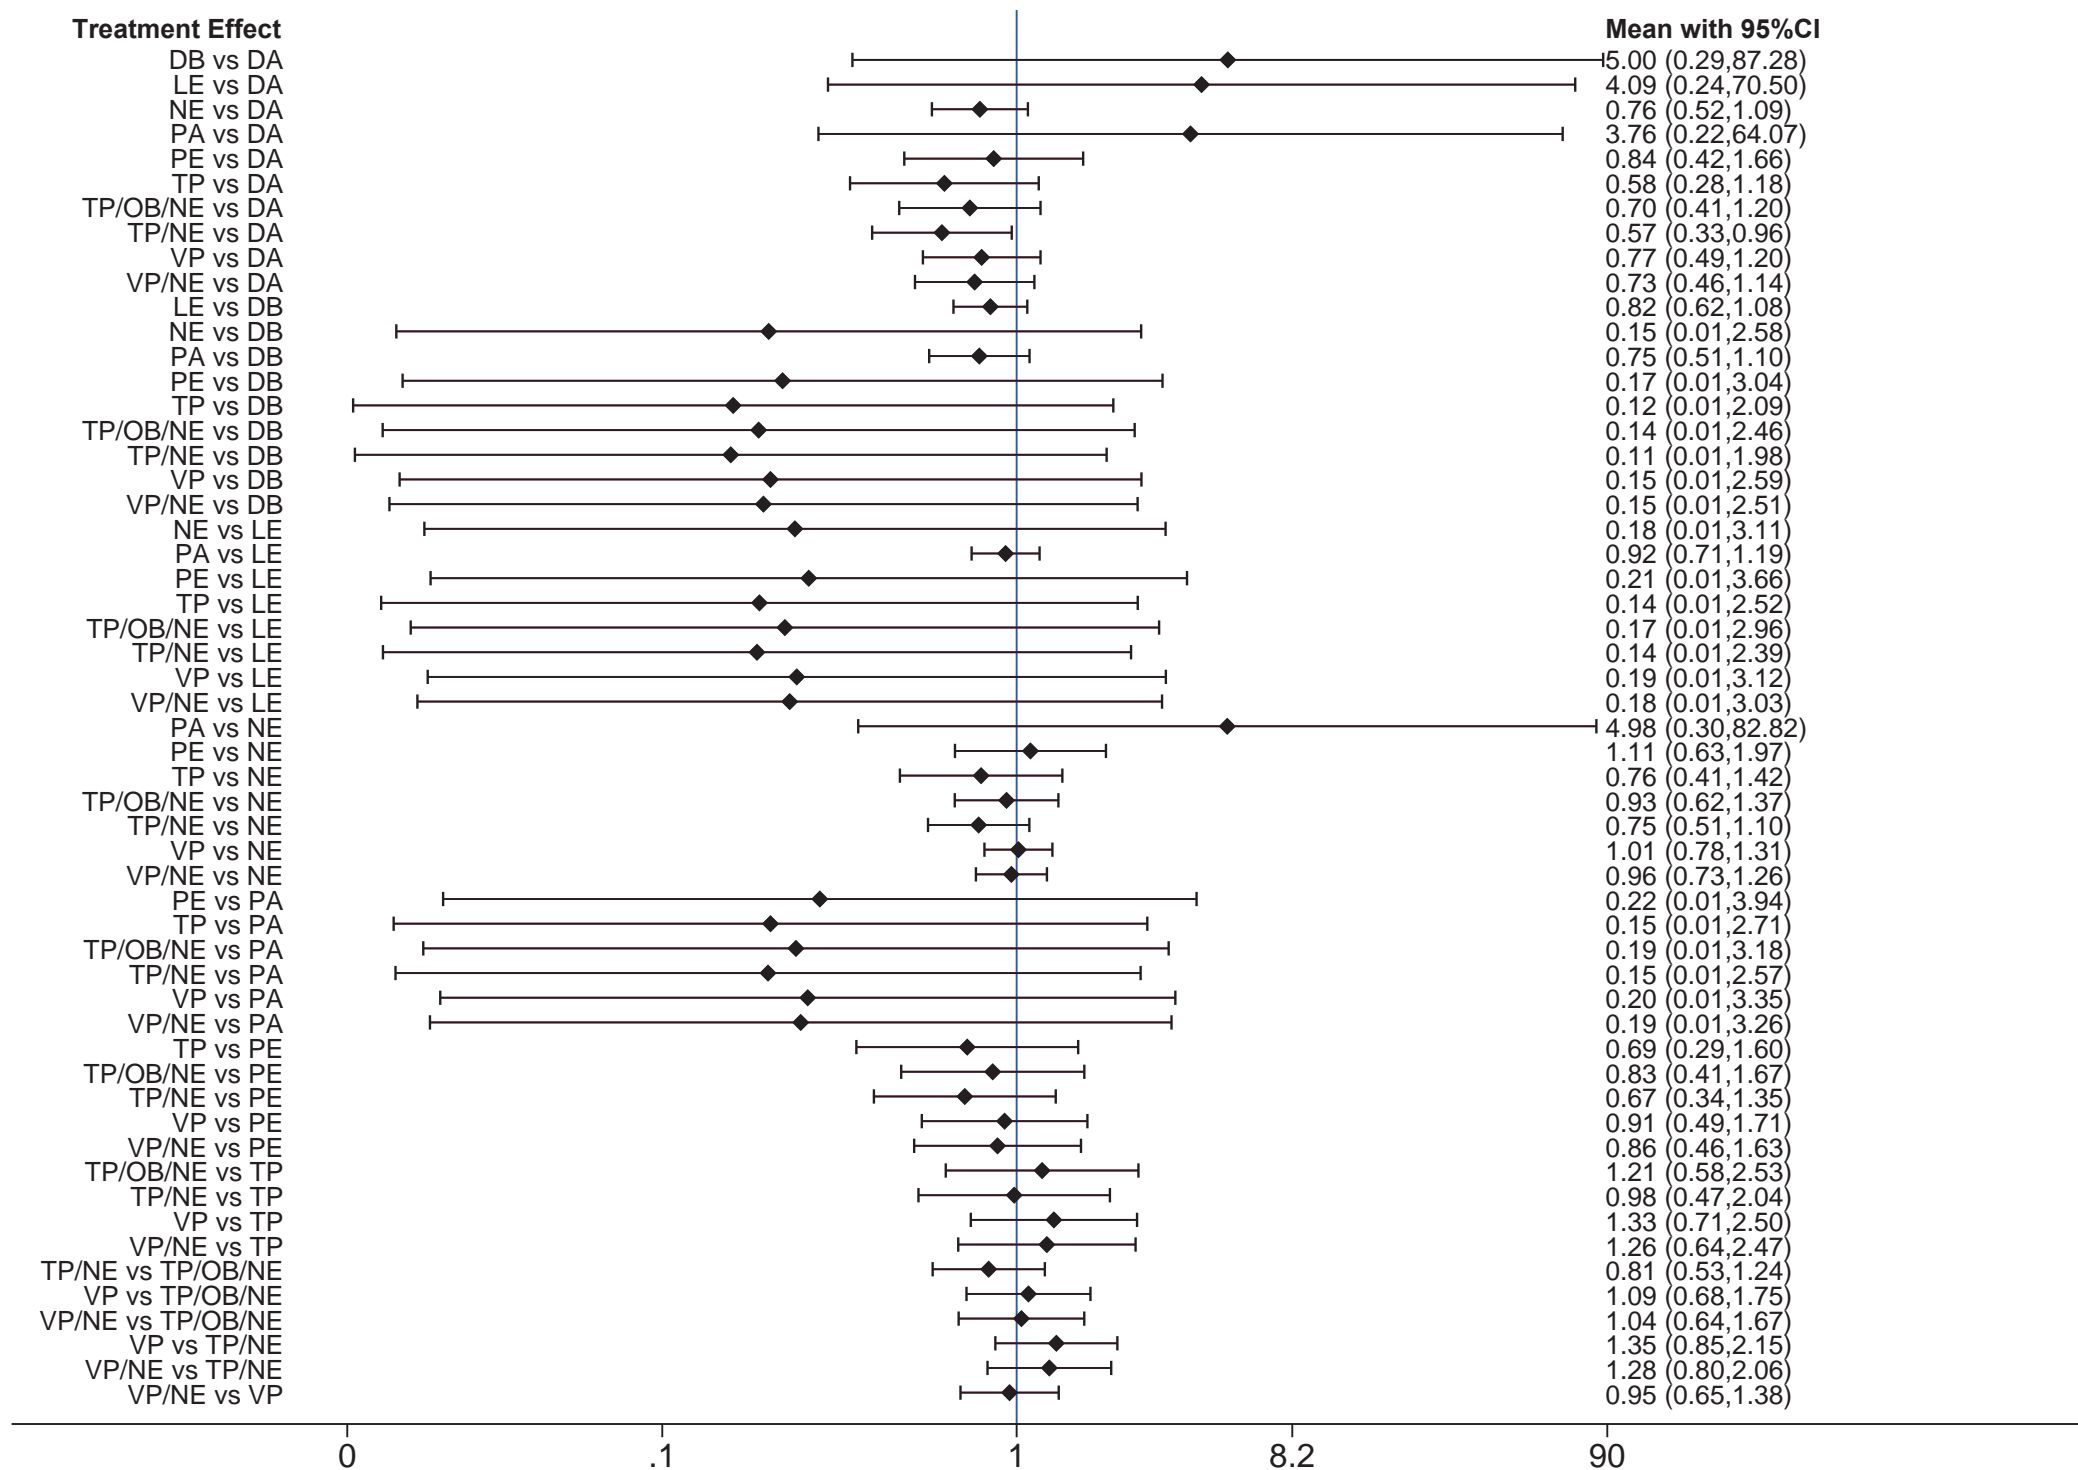

Supplementary Figure S7 Contribution plot for ICU mortality

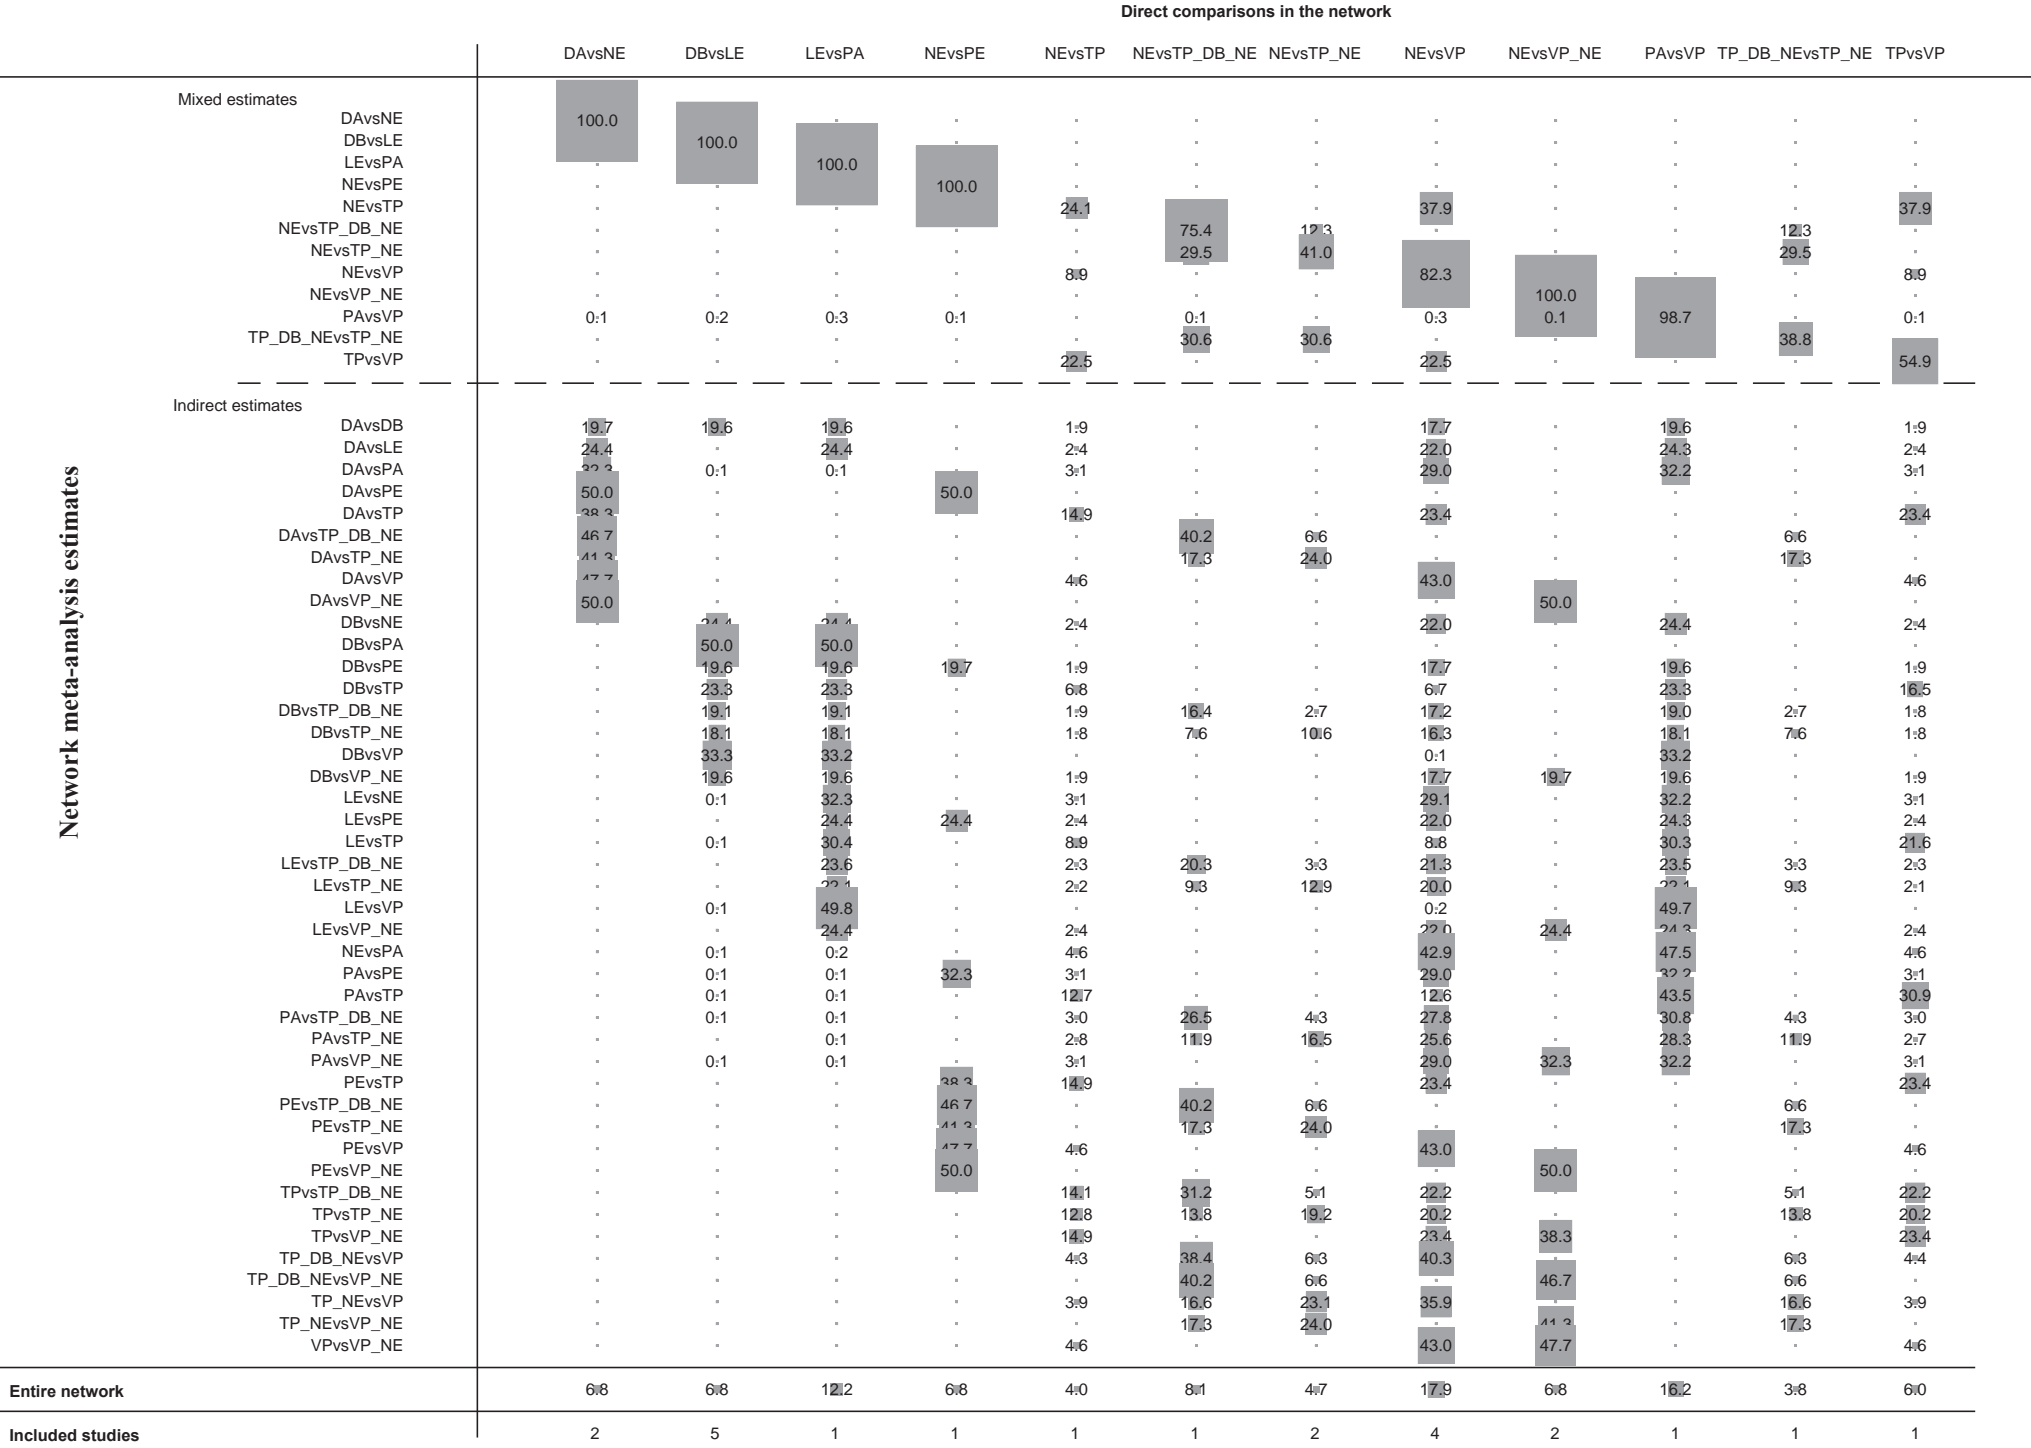



Supplementary Figure S8 Inconsistency analysis for ICU mortality

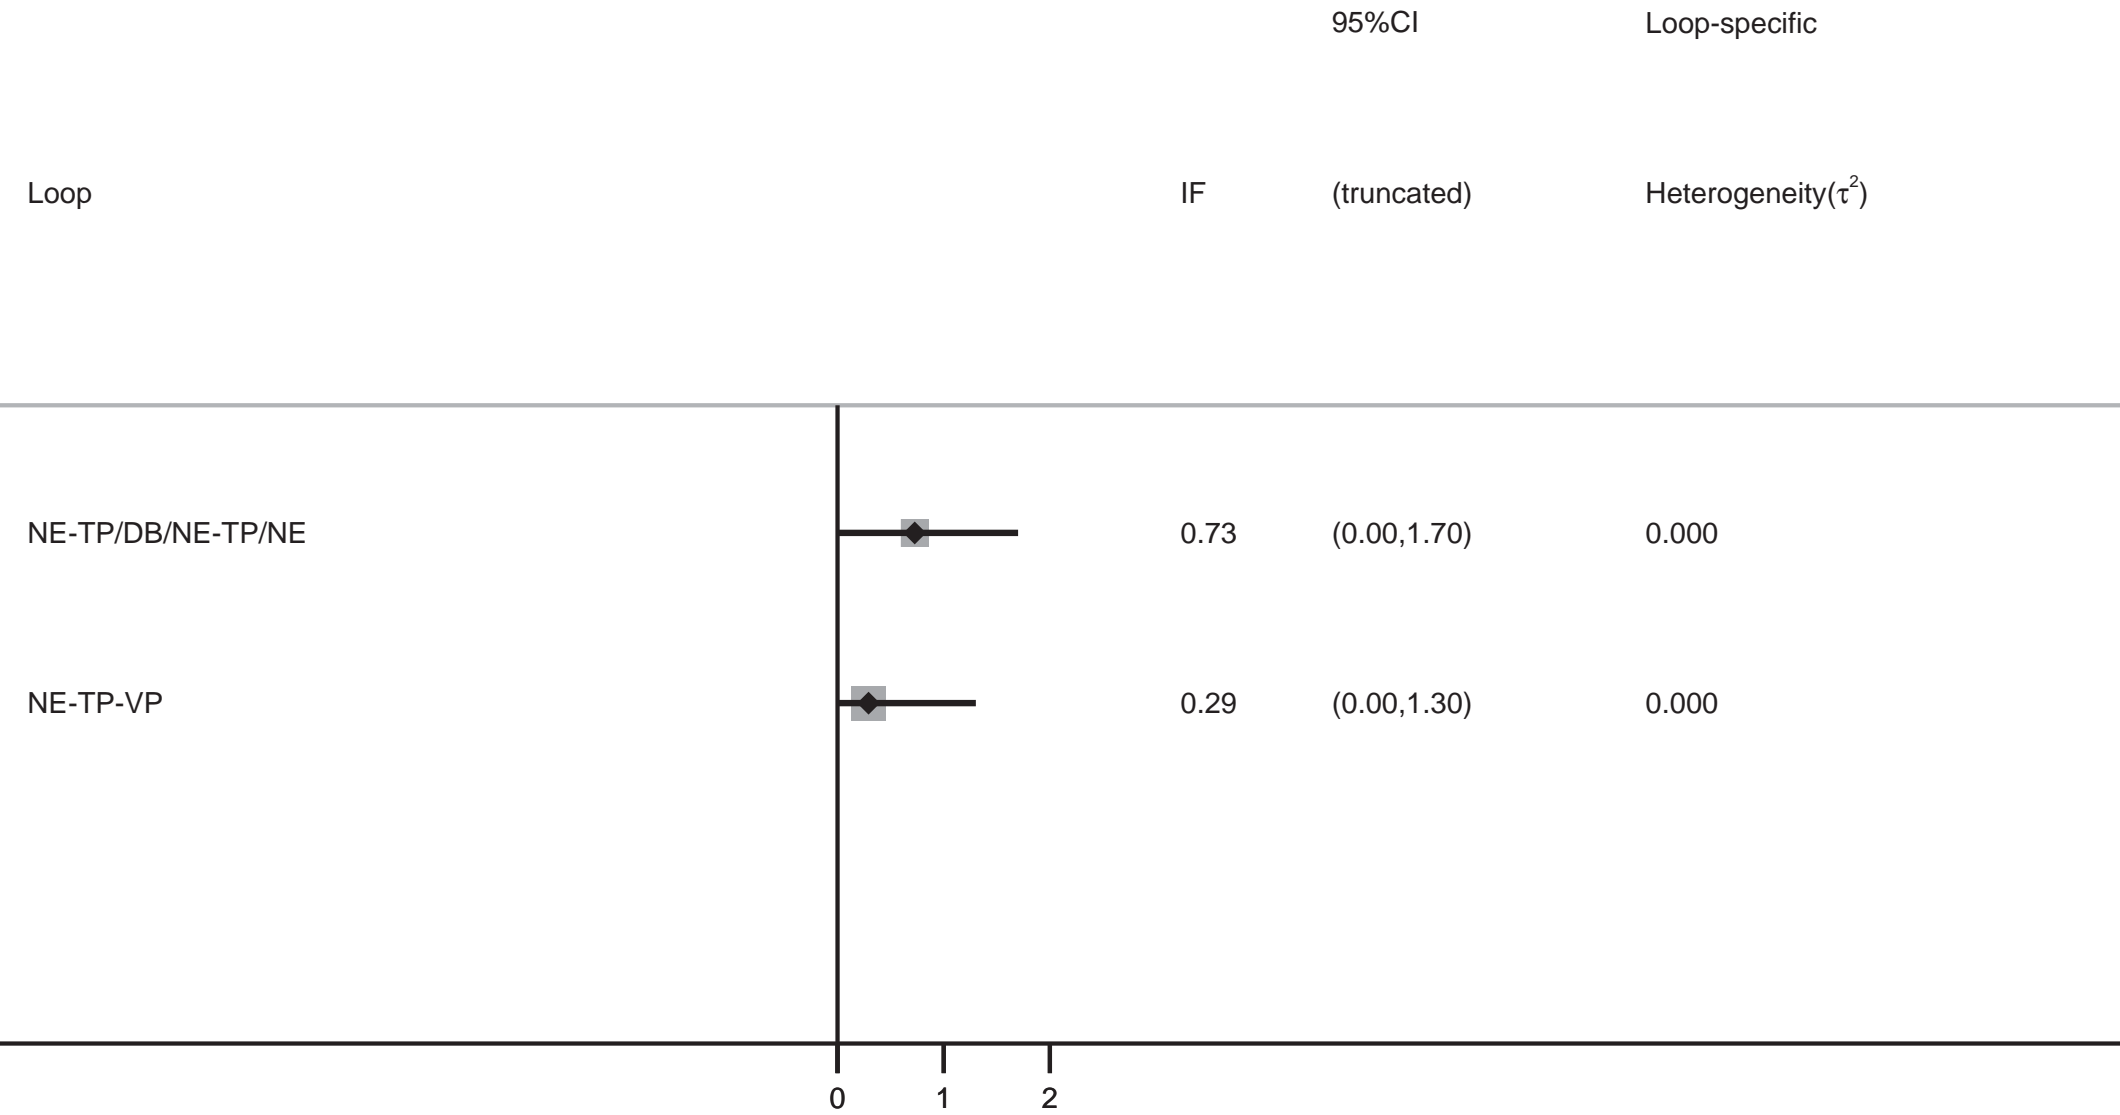

Supplementary Figure S9 Funnel plot for ICU mortality

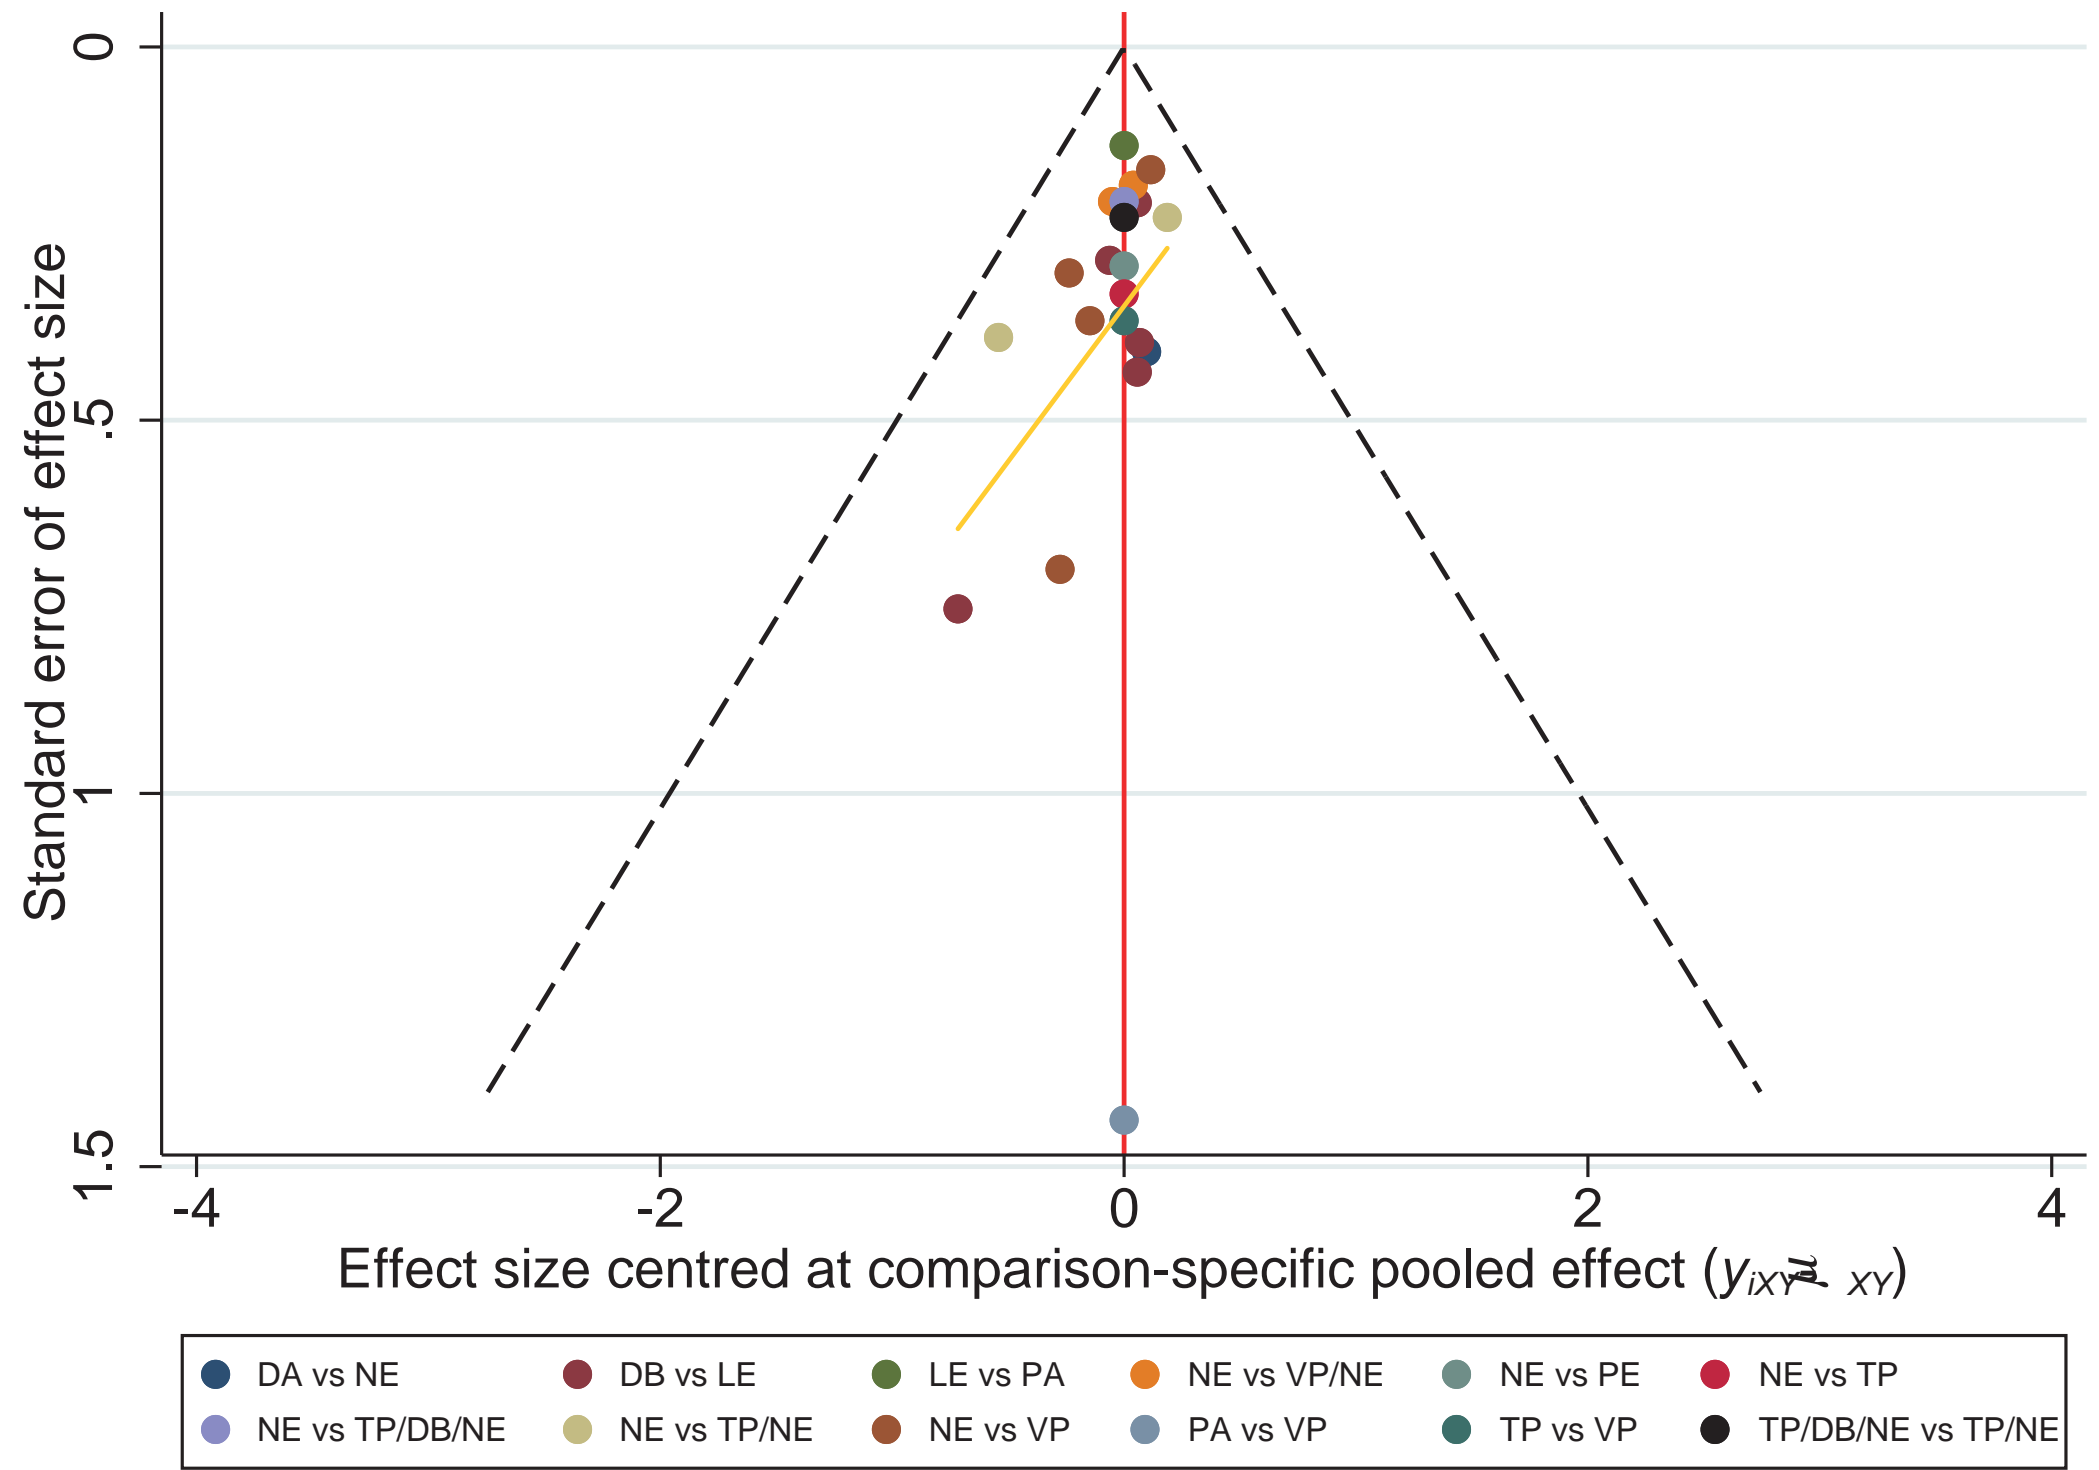

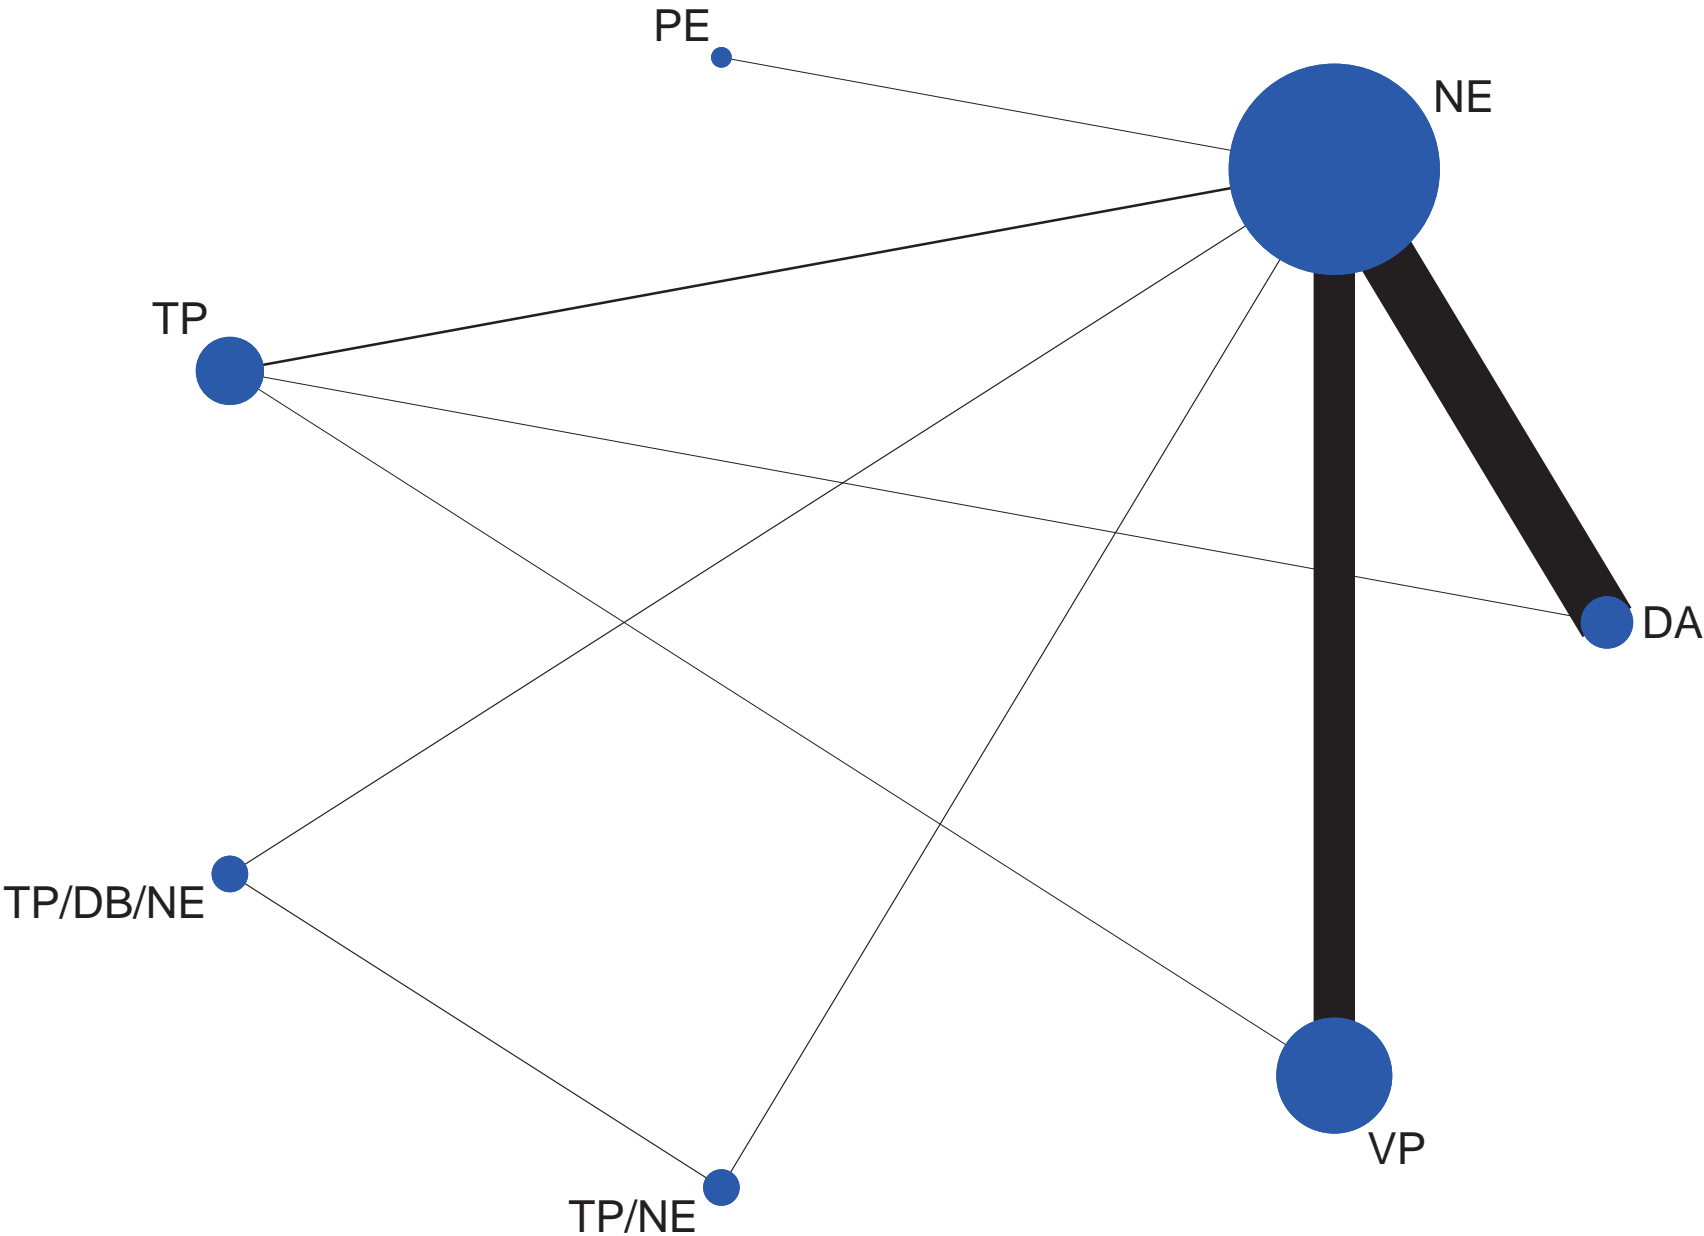

Supplementary Figure S11 SUCRA for ICU length of stay

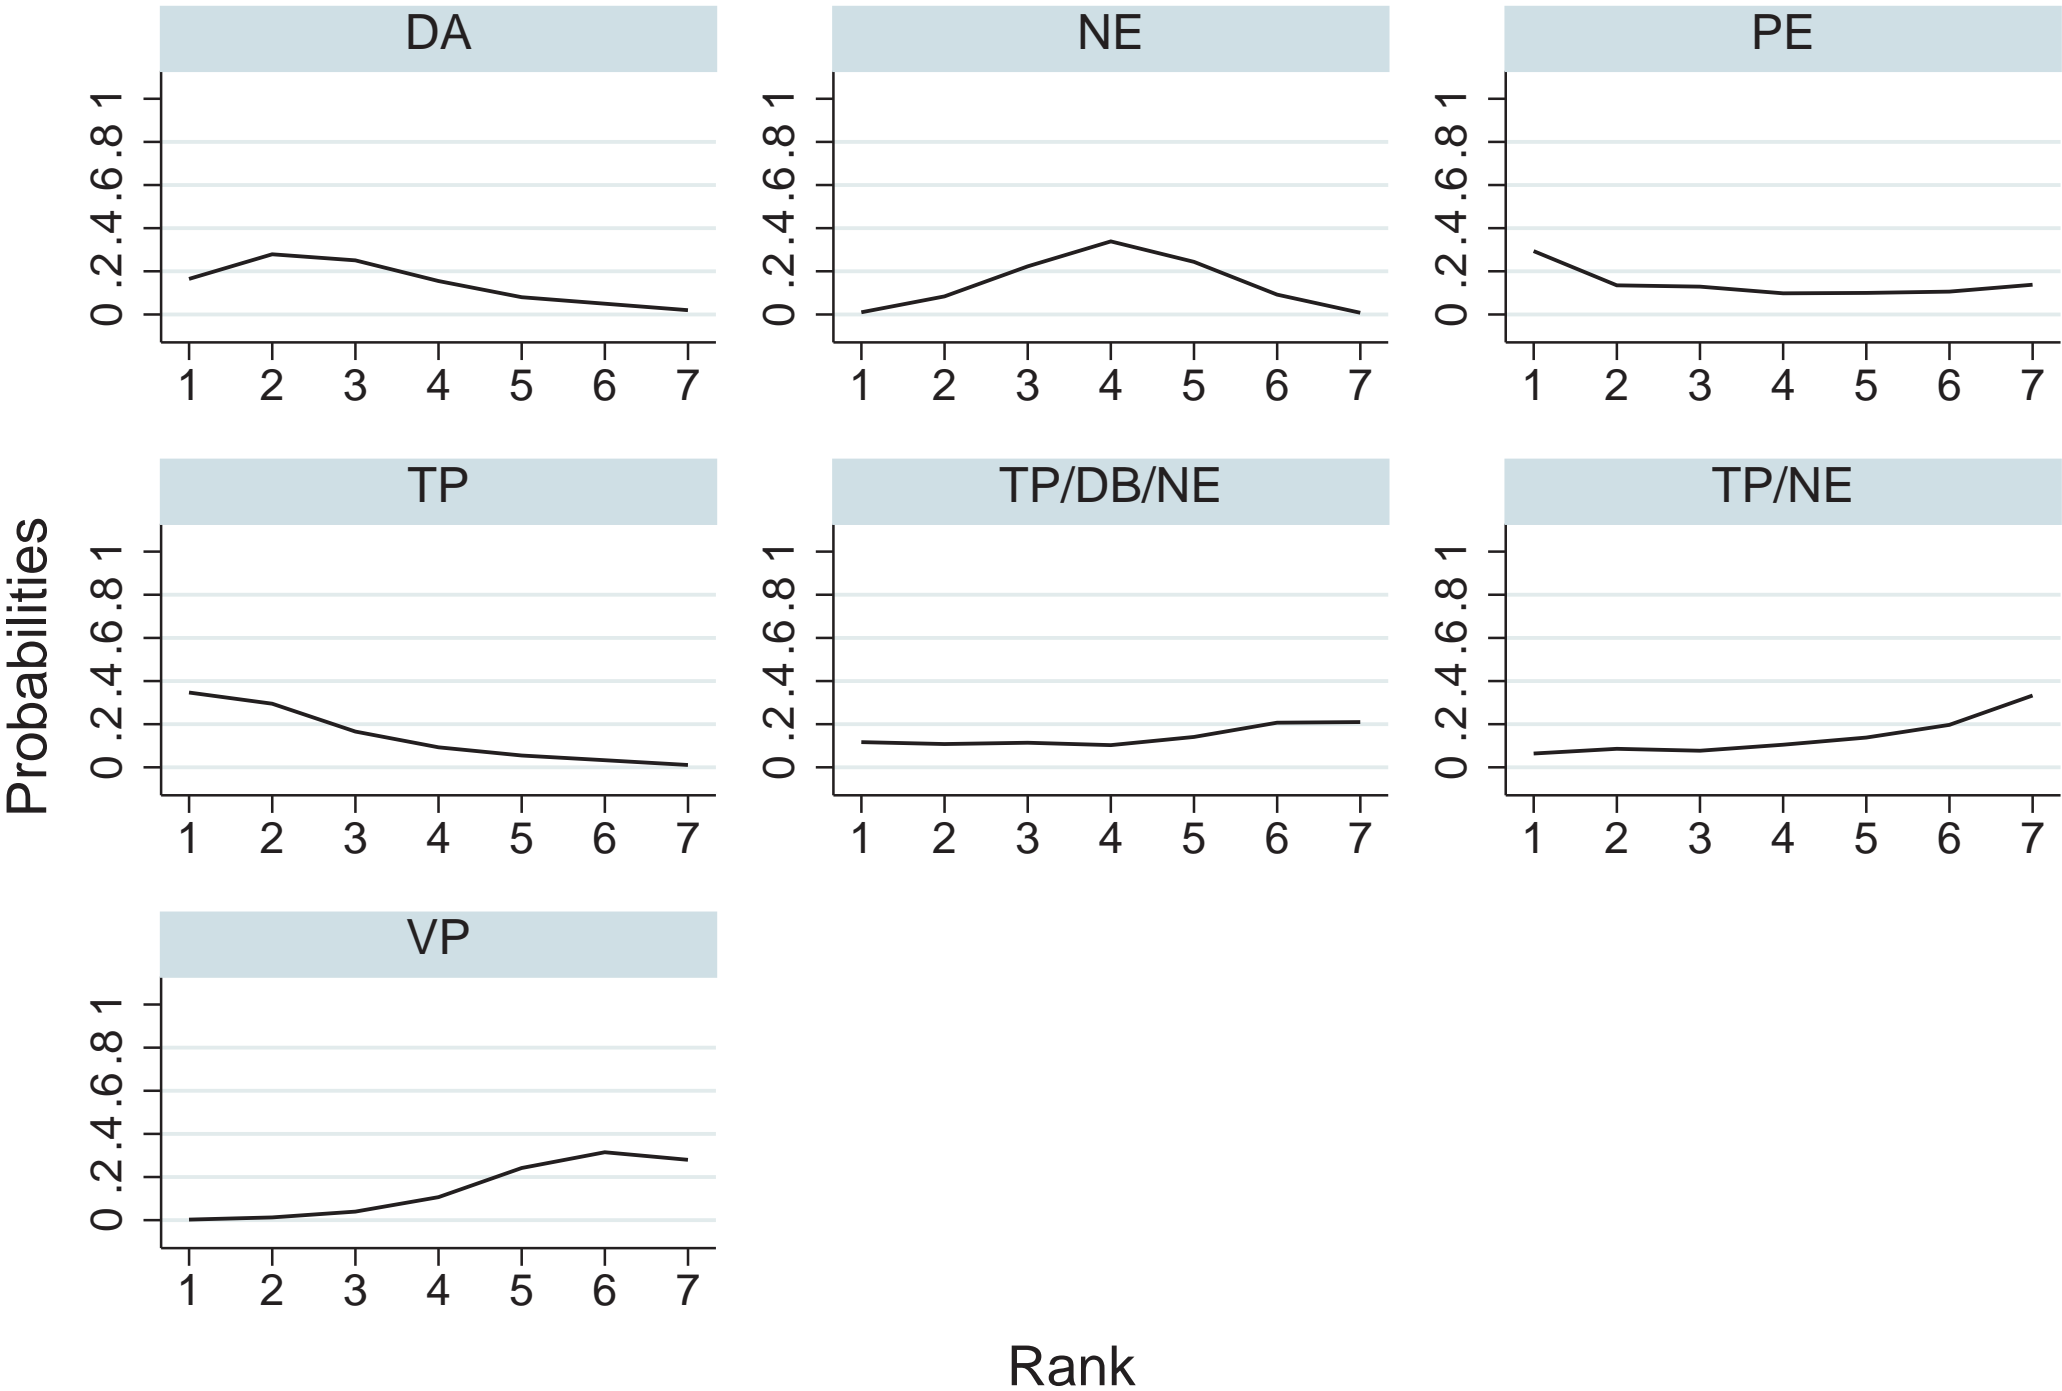

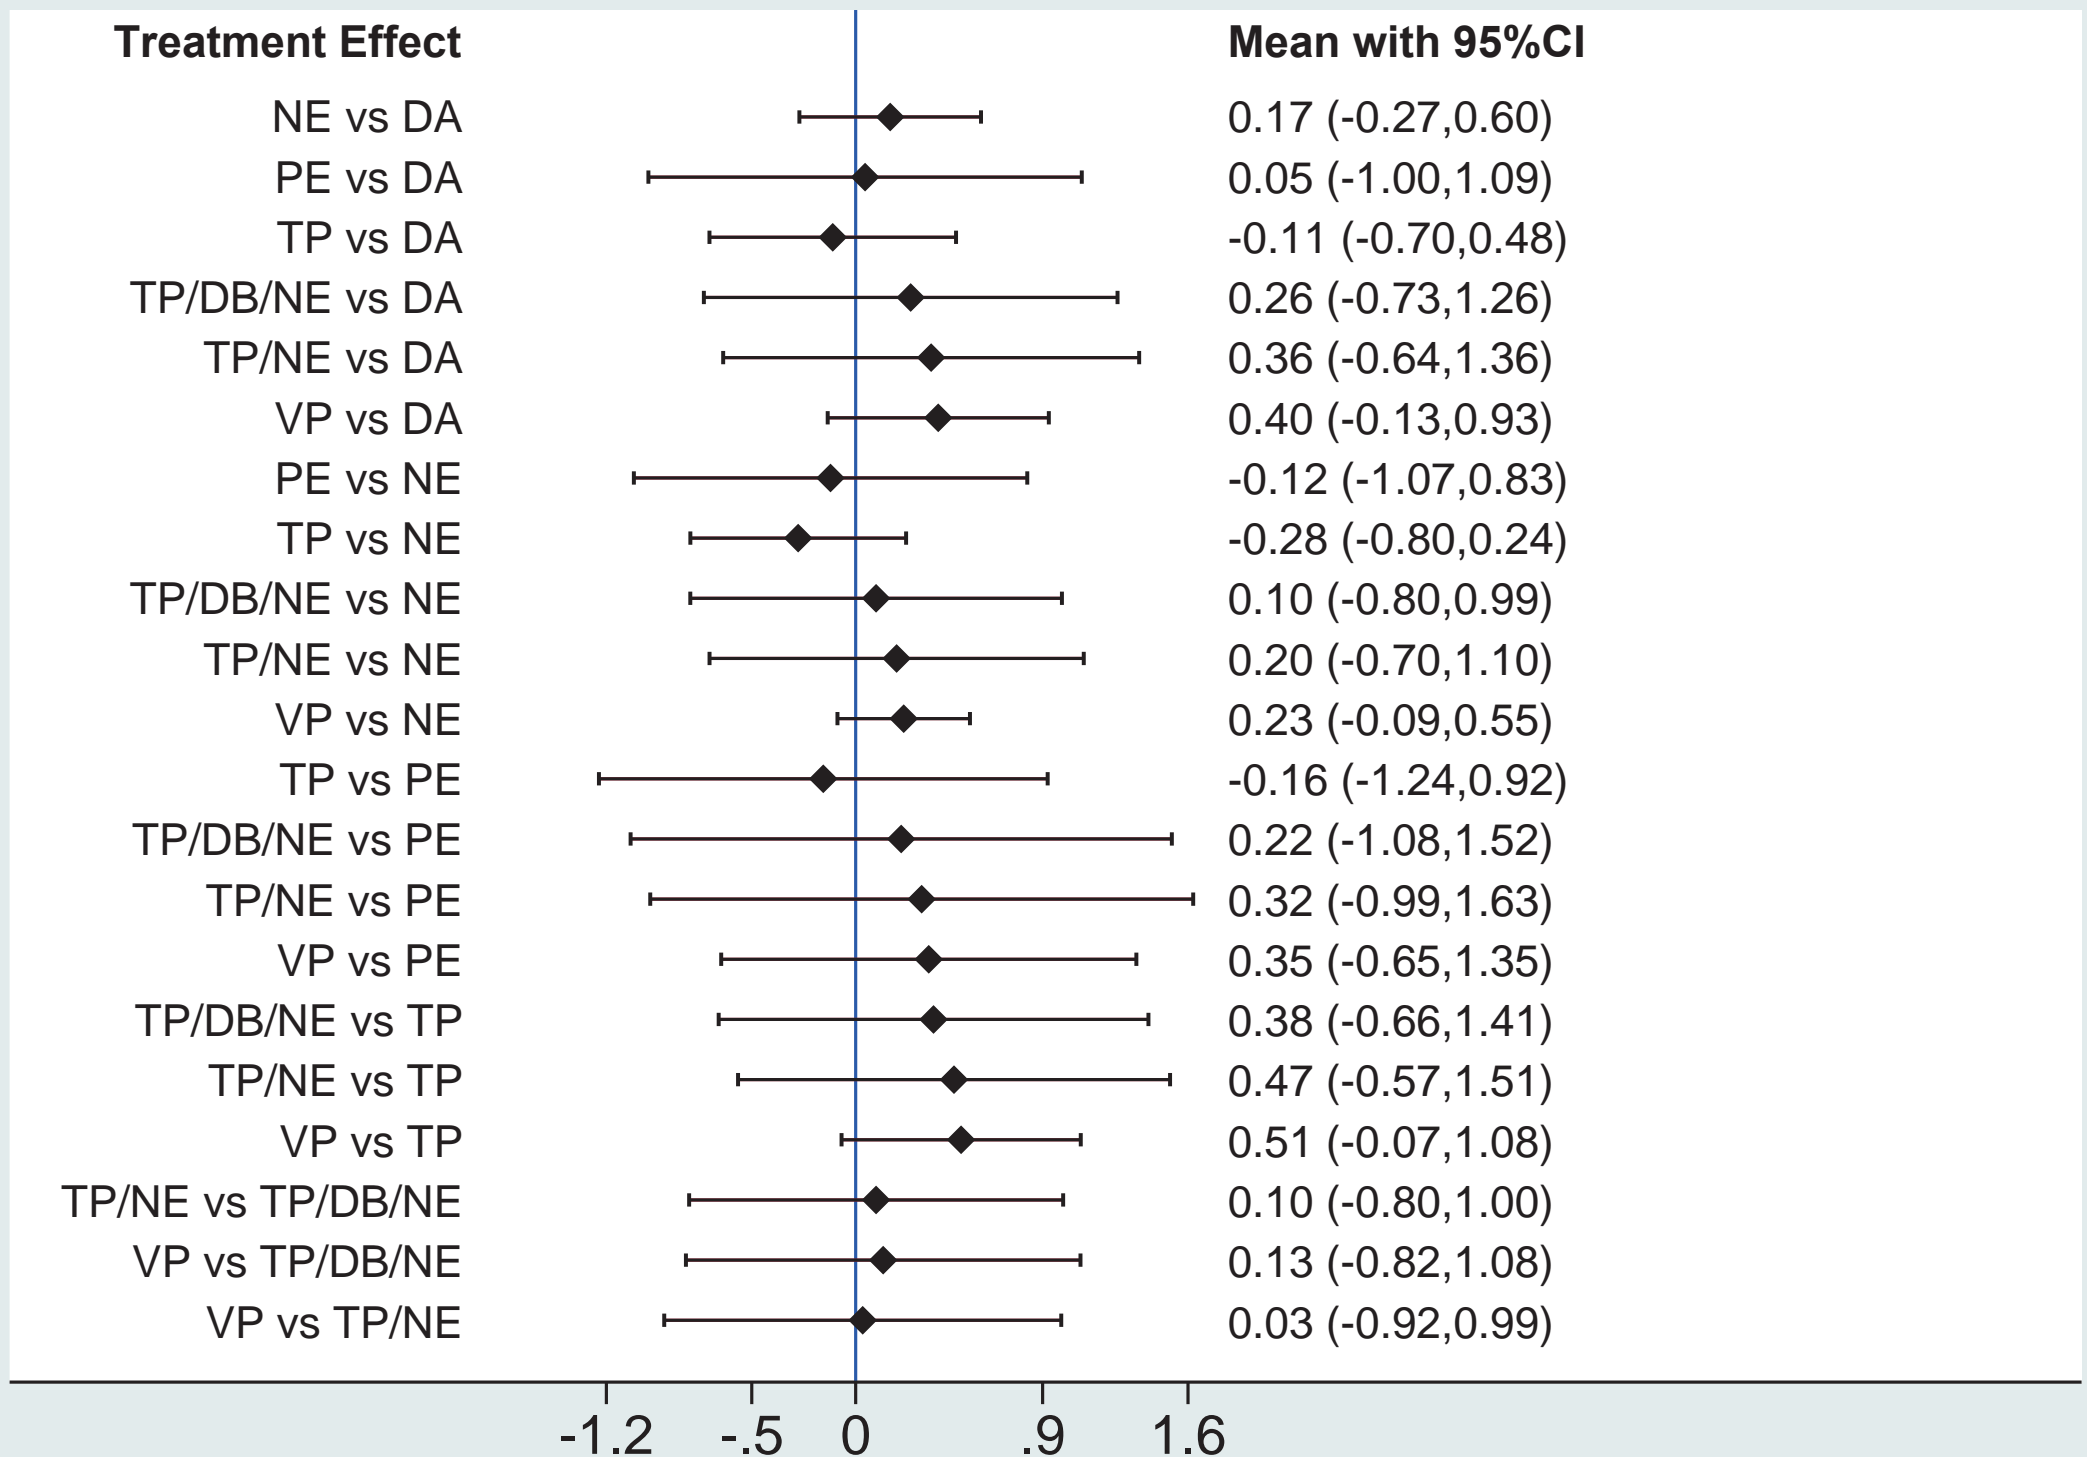

Supplementary Figure S13 Contribution plot for ICU length of stay

|                                 |                    | Direct comparisons in the network |        |        |        |              |           |        |                 |        |
|---------------------------------|--------------------|-----------------------------------|--------|--------|--------|--------------|-----------|--------|-----------------|--------|
|                                 |                    | DAvsNE                            | DAvsTP | NEvsPE | NEvsTP | NEvsTP/DB/NE | NEvsTP/NE | NEvsVP | TP/DB/NEvsTP/NE | TPvsVP |
| Network meta-analysis estimates | Mixed estimates    |                                   |        |        |        |              |           |        |                 |        |
|                                 | DAvsNE             | 89.1                              | 4:9    | .      | 3:7    | .            | .         | 1:1    | .               | 1:1    |
|                                 | DAvsTP             | 38.6                              | 13:8   |        | 29.7   | .            | .         | 9:0    | .               | 9:0    |
|                                 | NEvsPE             | .                                 | .      | 100.0  | .      | .            | .         | .      | .               | .      |
|                                 | NEvsTP             | 15.1                              | 15.1   |        | 43.5   | .            | .         | 13:1   | .               | 13:1   |
|                                 | NEvsTP/DB/NE       | .                                 | .      | .      | .      | 54.2         | 22.9      | .      | 22.9            | .      |
|                                 | NEvsTP_NE          | .                                 | .      | .      | .      | 23.4         | 53.2      | .      | 23.4            | .      |
|                                 | NEvsVP             | 5:3                               | 5:3    | .      | 15:3   | .            | .         | 53.6   | .               | 20:6   |
|                                 | TP/DB/NEvsTP/NE    | .                                 | .      | .      | .      | 28.4         | 28.4      | .      | 43.1            | .      |
|                                 | TPvsVP             | 8:3                               | 8:3    | .      | 23:9   | .            | .         | 32.1   | .               | 27:4   |
|                                 | Indirect estimates |                                   |        |        |        |              |           |        |                 |        |
|                                 | DAvsPE             | 45.9                              | 2:5    | 48.4   | 1:9    | .            | .         | 0:6    | .               | 0:6    |
|                                 | DAvsTP/DB/NE       | 40.2                              | 2:2    | .      | 1:7    | 29.8         | 12.6      | 0:5    | 12.6            | 0:5    |
|                                 | DAvsTP/NE          | 40.0                              | 2:2    | .      | 1:7    | 12.9         | 29.3      | 0:5    | 12.9            | 0:5    |
|                                 | DAvsVP             | 40.5                              | 5:7    | .      | 7:7    | .            | .         | 32.8   | .               | 13:4   |
|                                 | PEvsTP             | 8:8                               | 8:8    | 41.8   | 25:3   | .            | .         | 7:6    | .               | 7:6    |
|                                 | PEvsTP/DB/NE       | .                                 | .      | 43.5   | .      | 30.6         | 12.9      | .      | 12.9            | .      |
|                                 | PEvsTP/NE          | .                                 | .      | 43.4   | .      | 13.3         | 30.1      | .      | 13.3            | .      |
|                                 | PEvsVP             | 3:0                               | 3:0    | 42.6   | 8:8    | .            | .         | 30.8   | .               | 11:8   |
|                                 | TPvsTP/DB/NE       | 7:8                               | 7:8    | .      | 22.5   | 26.1         | 11:0      | 6:8    | 11:0            | 6:8    |
|                                 | TPvsTP/NE          | 7:8                               | 7:8    | .      | 22.5   | 11:3         | 25.7      | 6:8    | 11:3            | 6:8    |
|                                 | TP/DB/NEvsVP       | 2:7                               | 2:7    | .      | 7:8    | 26.6         | 11:2      | 27.3   | 11:2            | 10:5   |
|                                 | TP/NEvsVP          | 2:7                               | 2:7    | .      | 7:8    | 11:5         | 26.2      | 27.2   | 11:5            | 10:5   |
| Entire network                  |                    | 16.1                              | 4:5    | 14.5   | 11:0   | 13.1         | 12.9      | 12.3   | 8:7             | 6:8    |
| Included studies                |                    | 2                                 | 1      | 1      | 2      | 1            | 1         | 6      | 1               | 1      |

Supplementary Figure S14 Inconsistency analysis for ICU length of stay

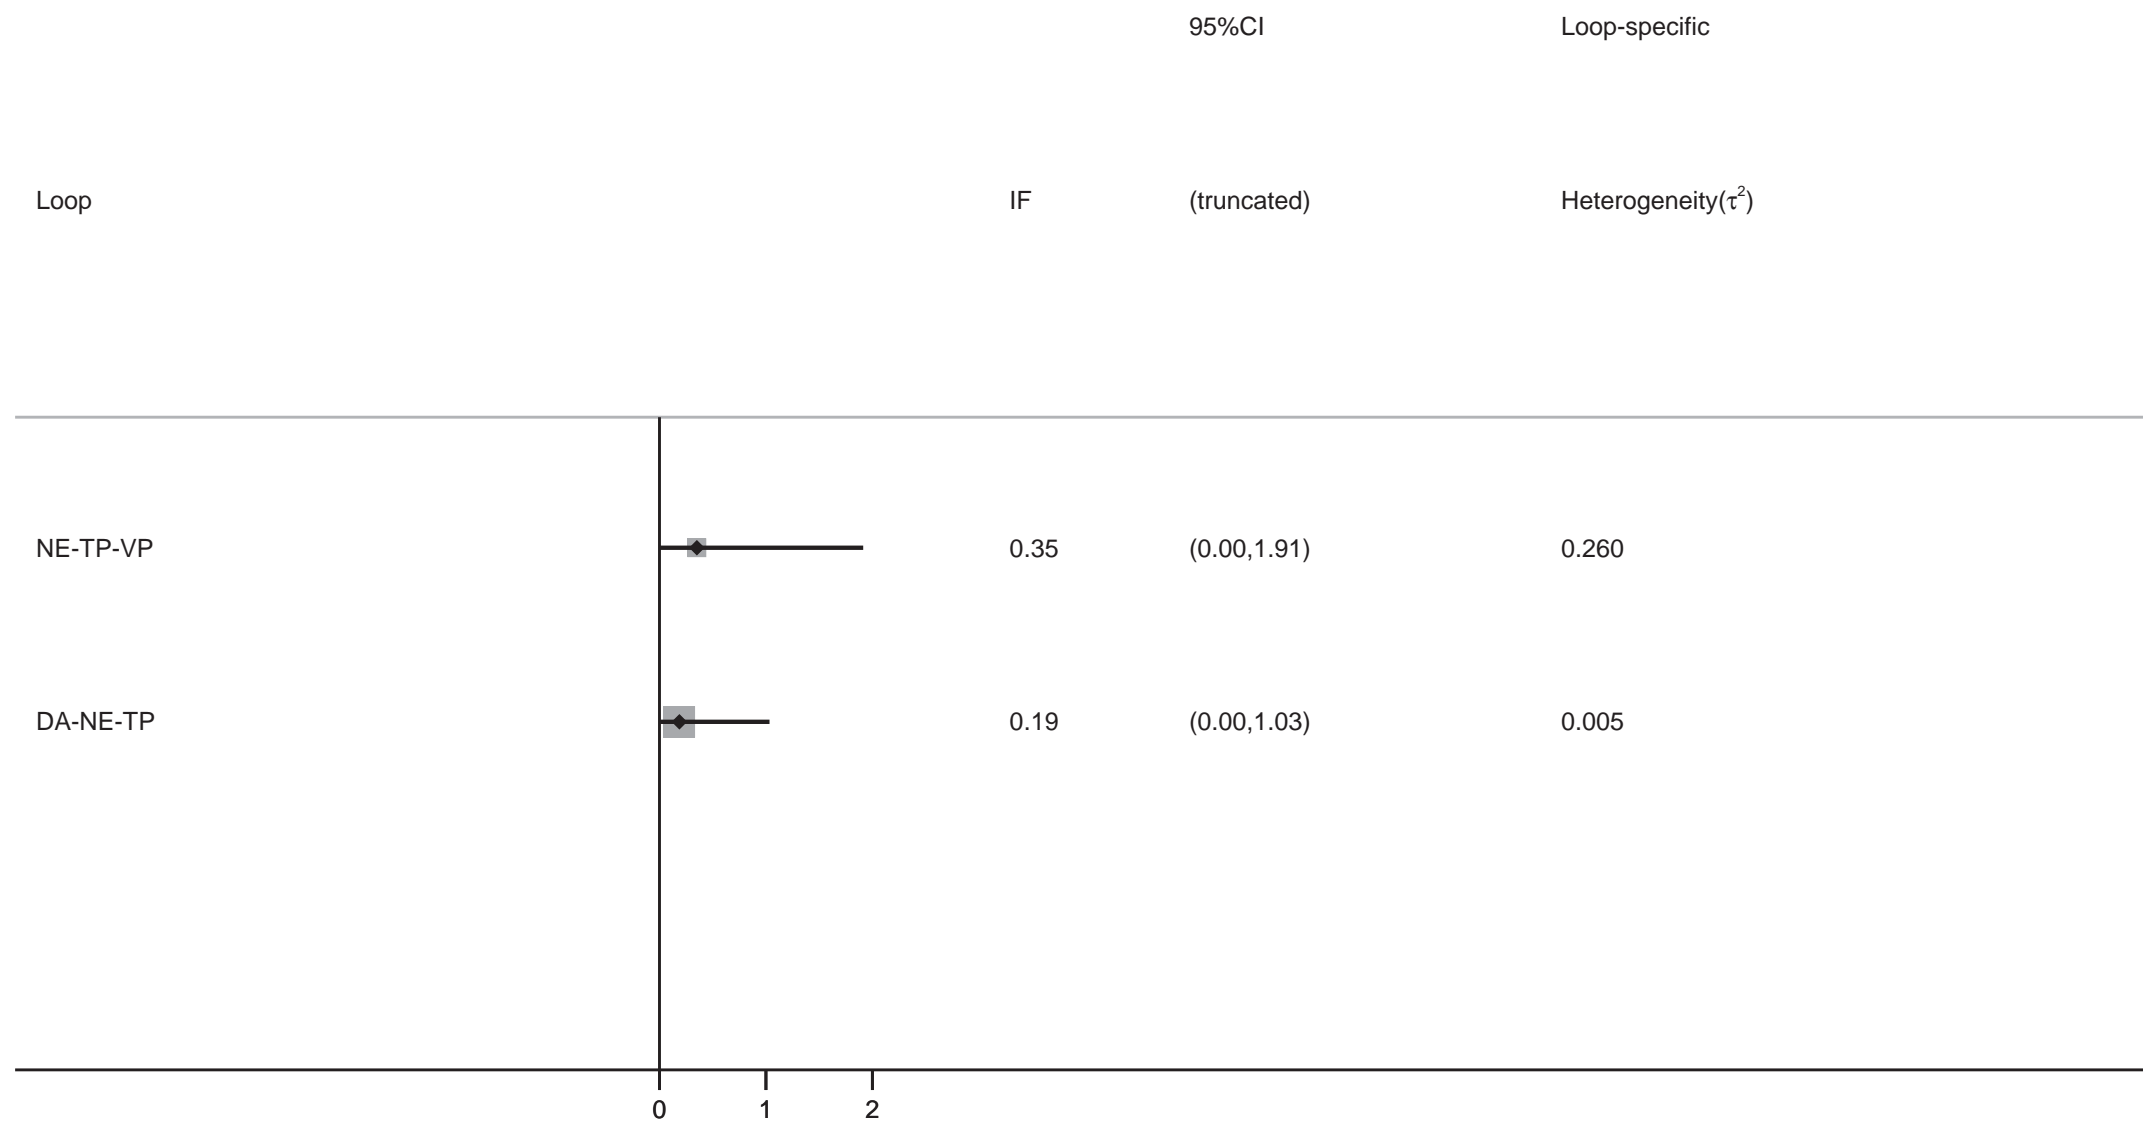

\*\*\* Loop(s) [NE-TP/DB/NE-TP/NE] are formed only by multi-arm trial(s) - Consistent by definition

Supplementary Figure S15 Funnel plot for ICU length of stay

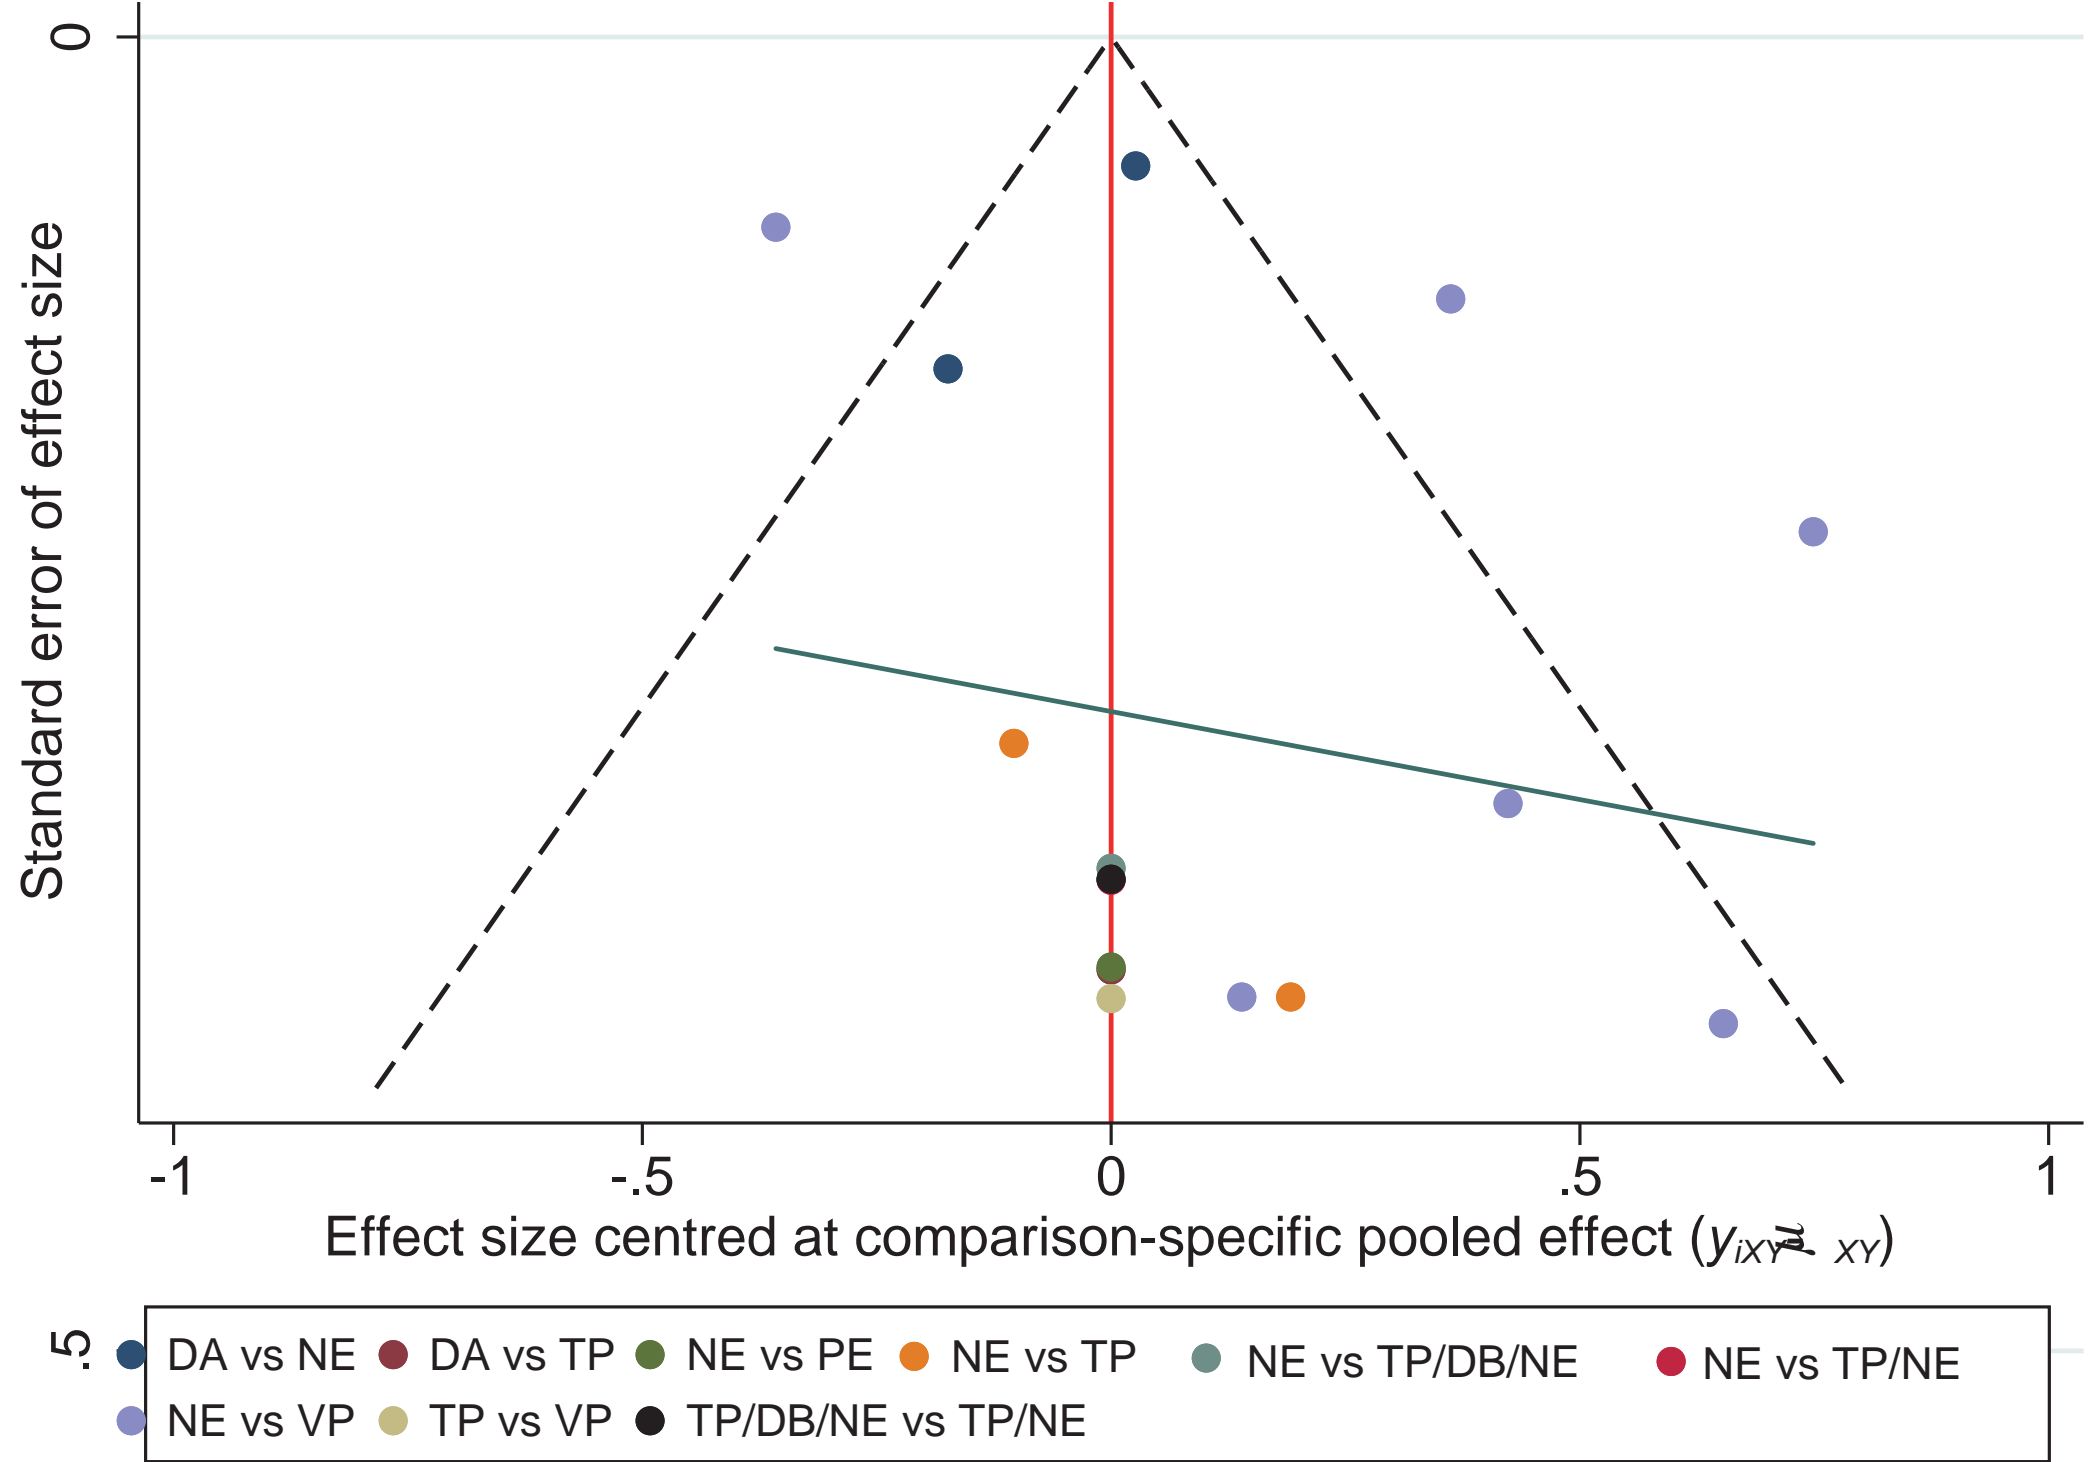



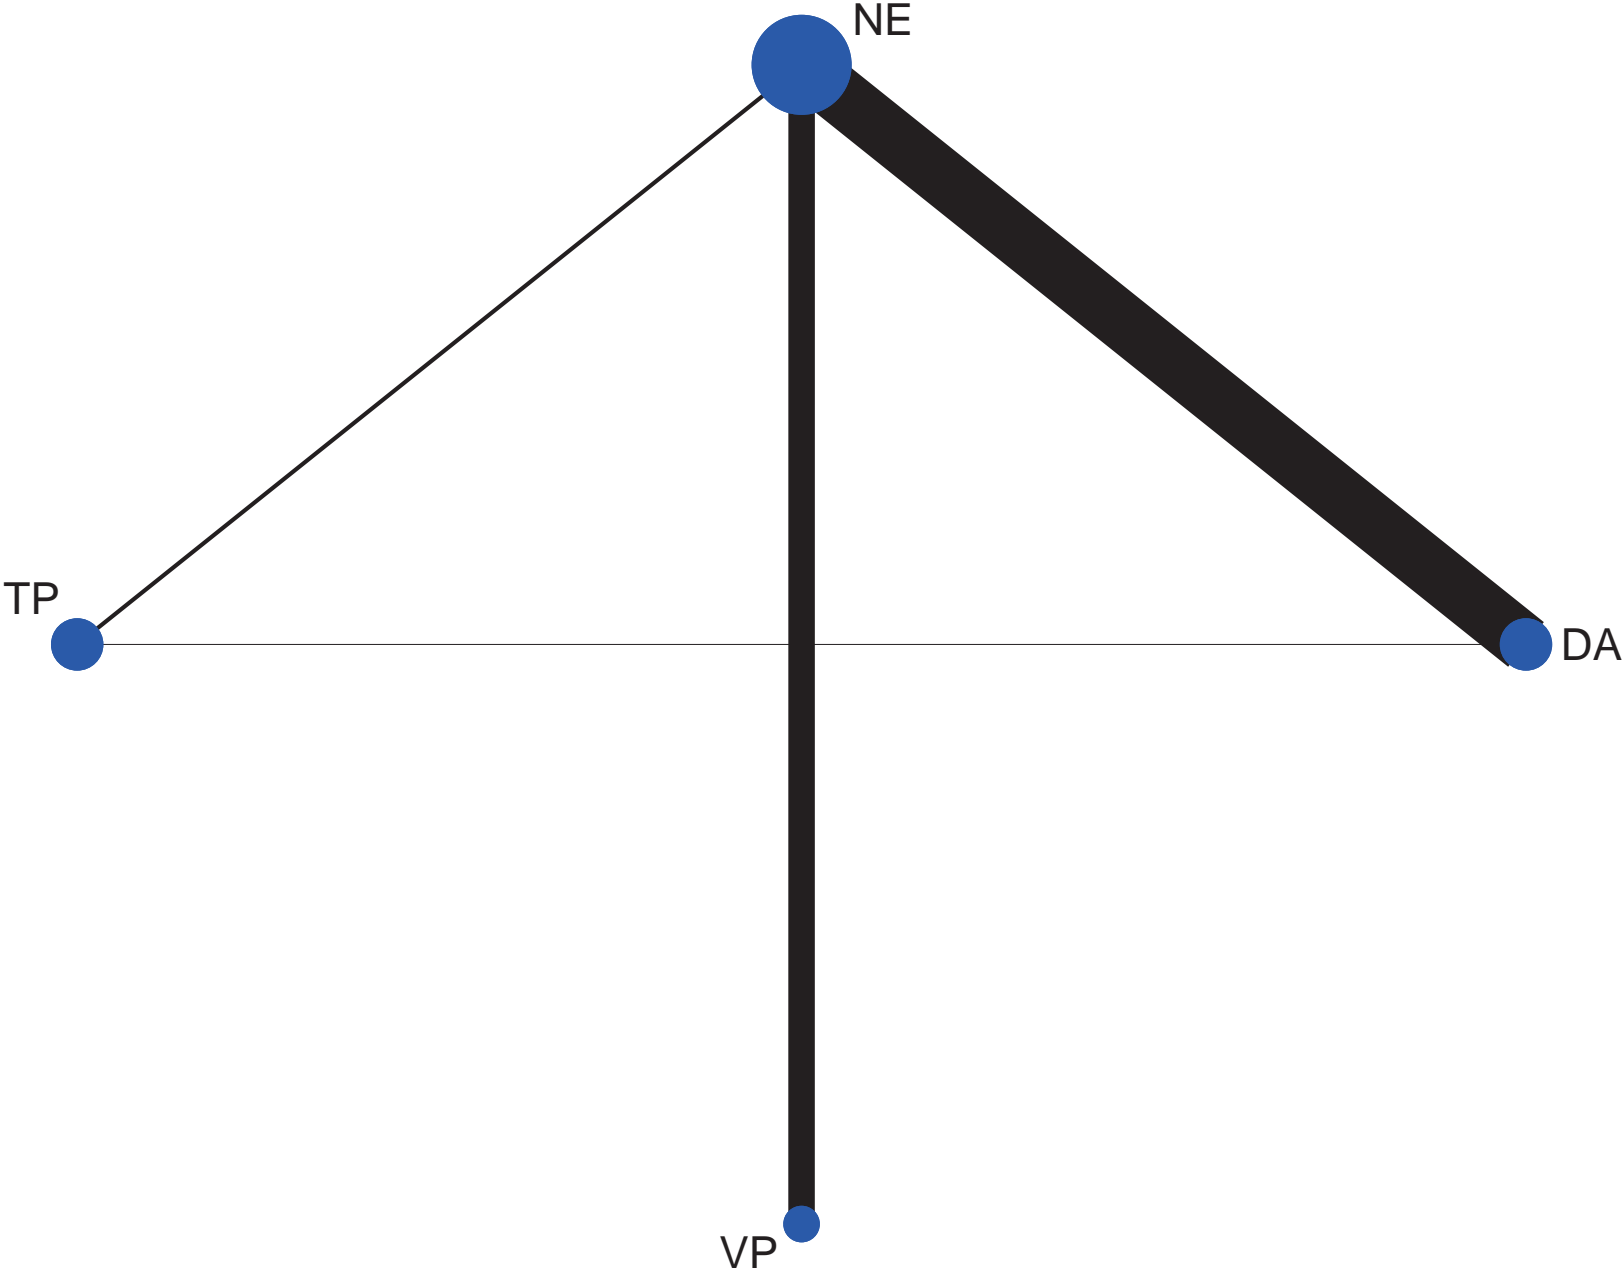

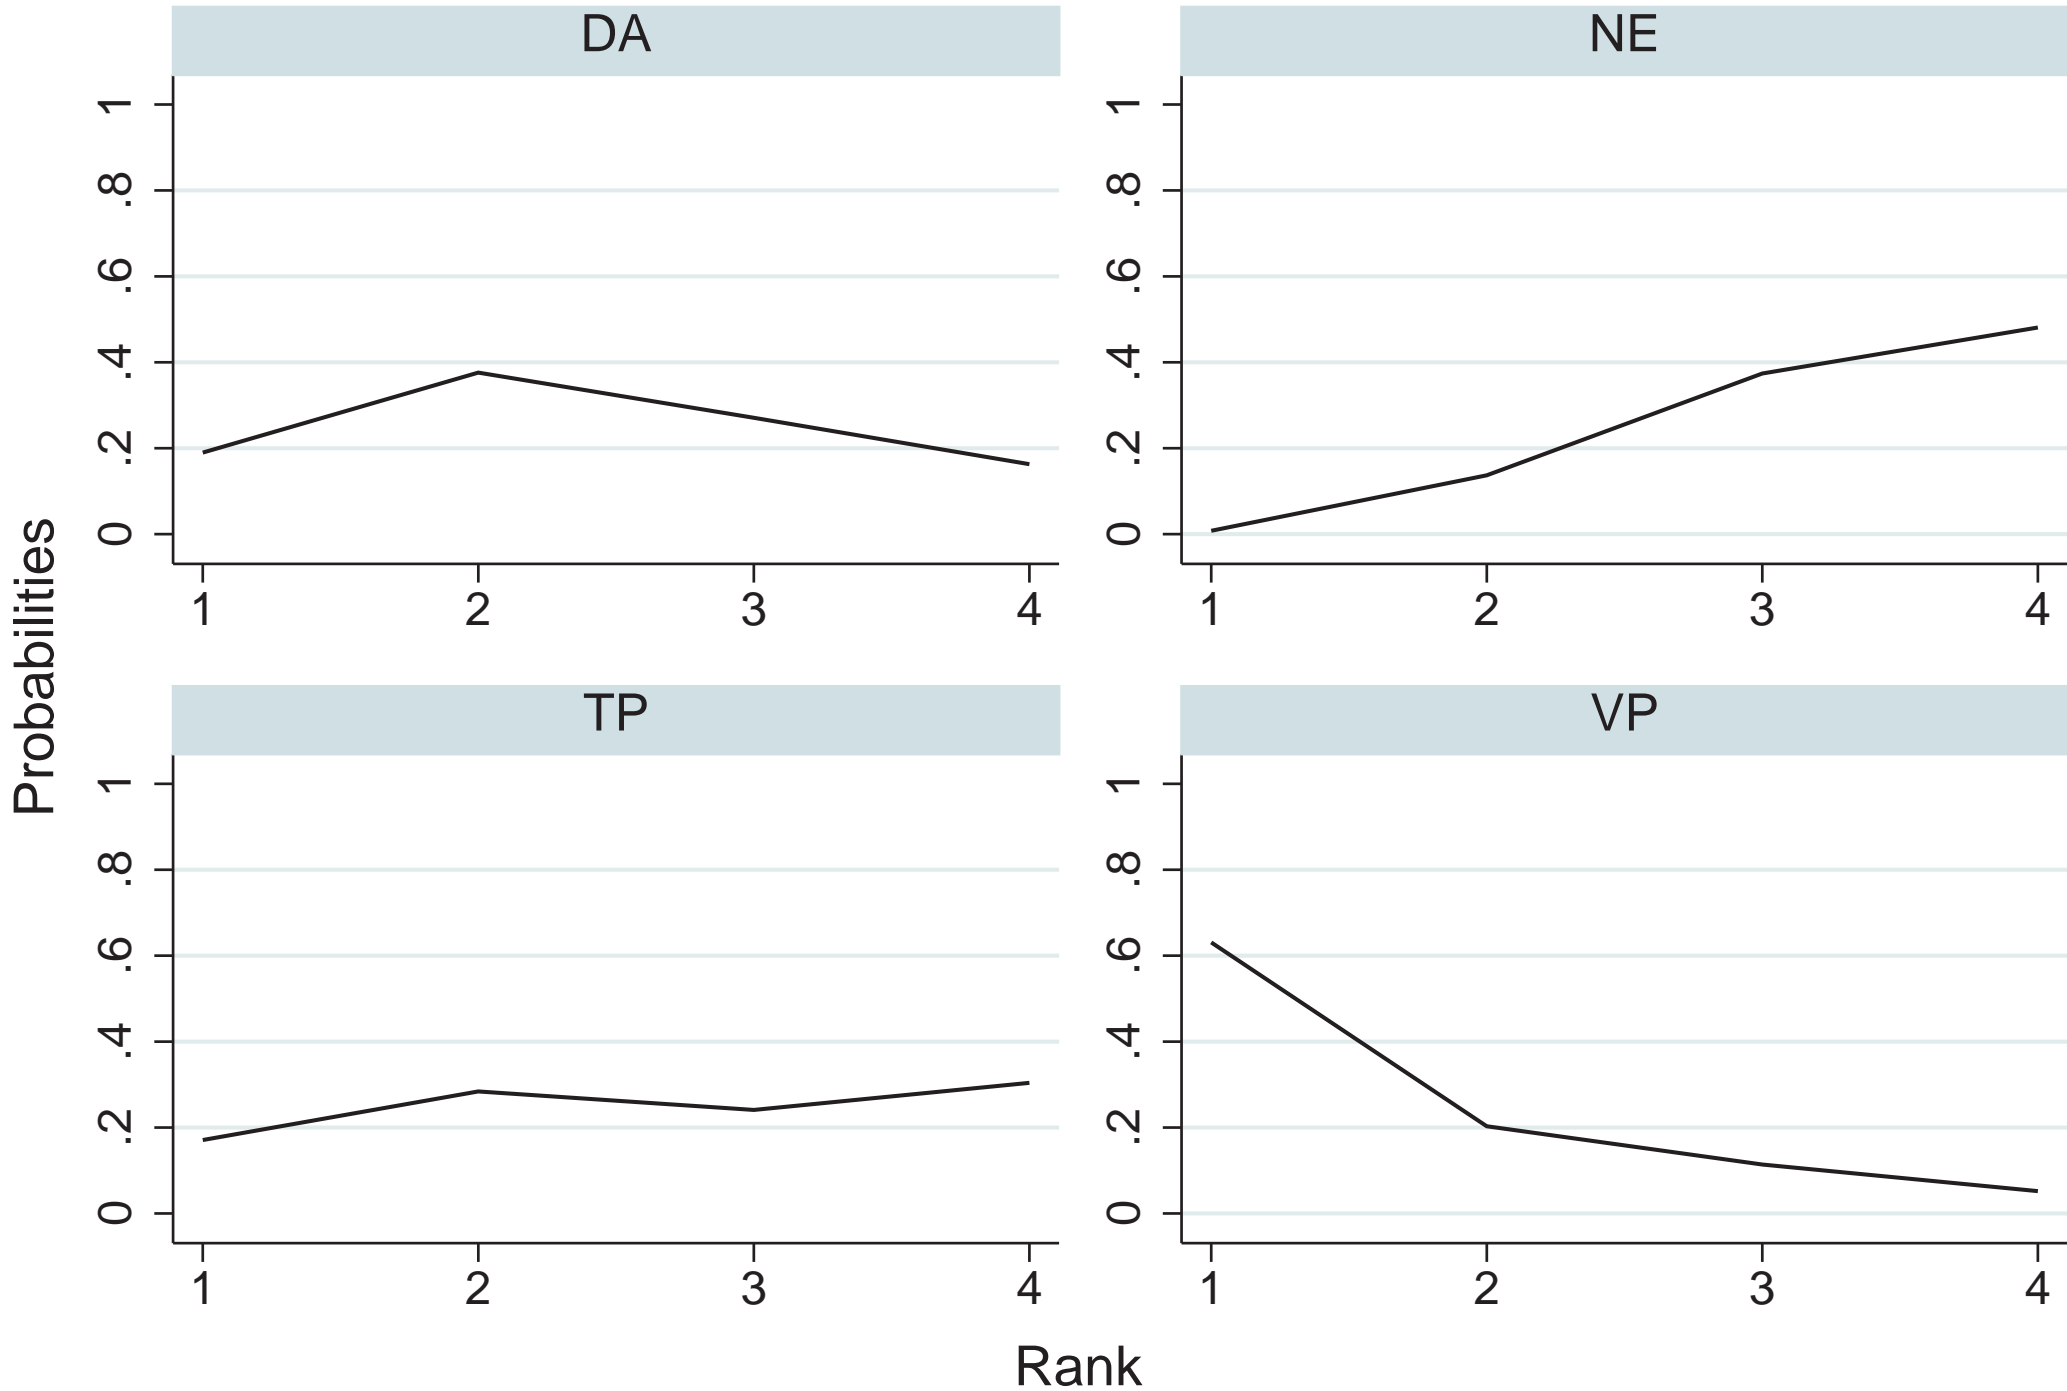

Graphs by Treatment

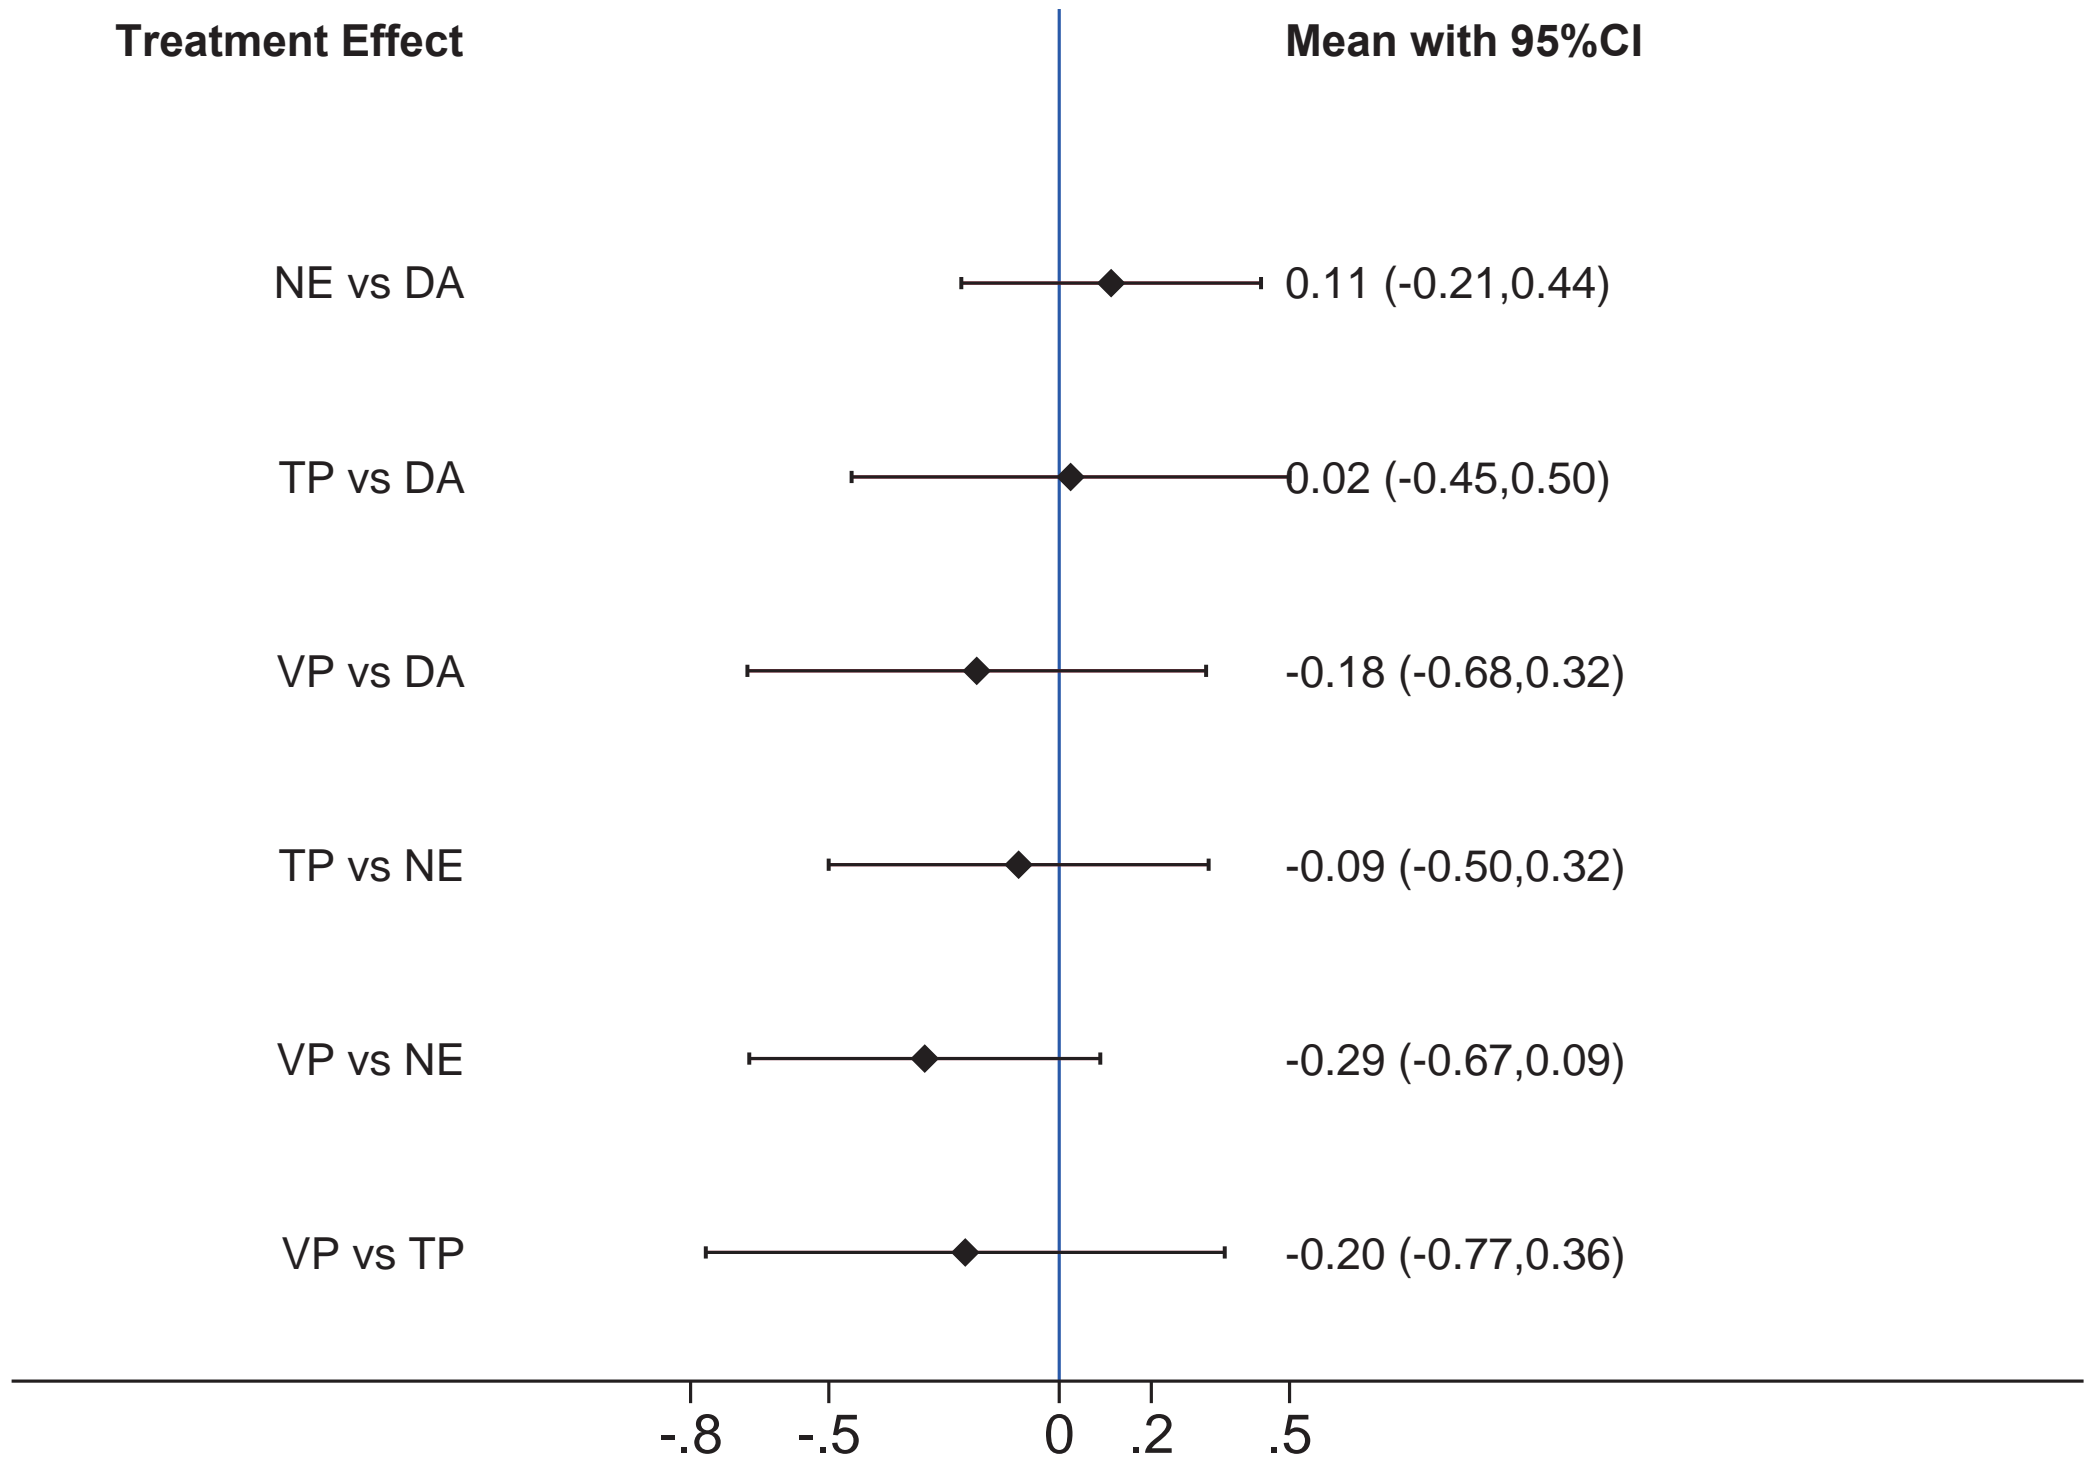

Direct comparisons in the network

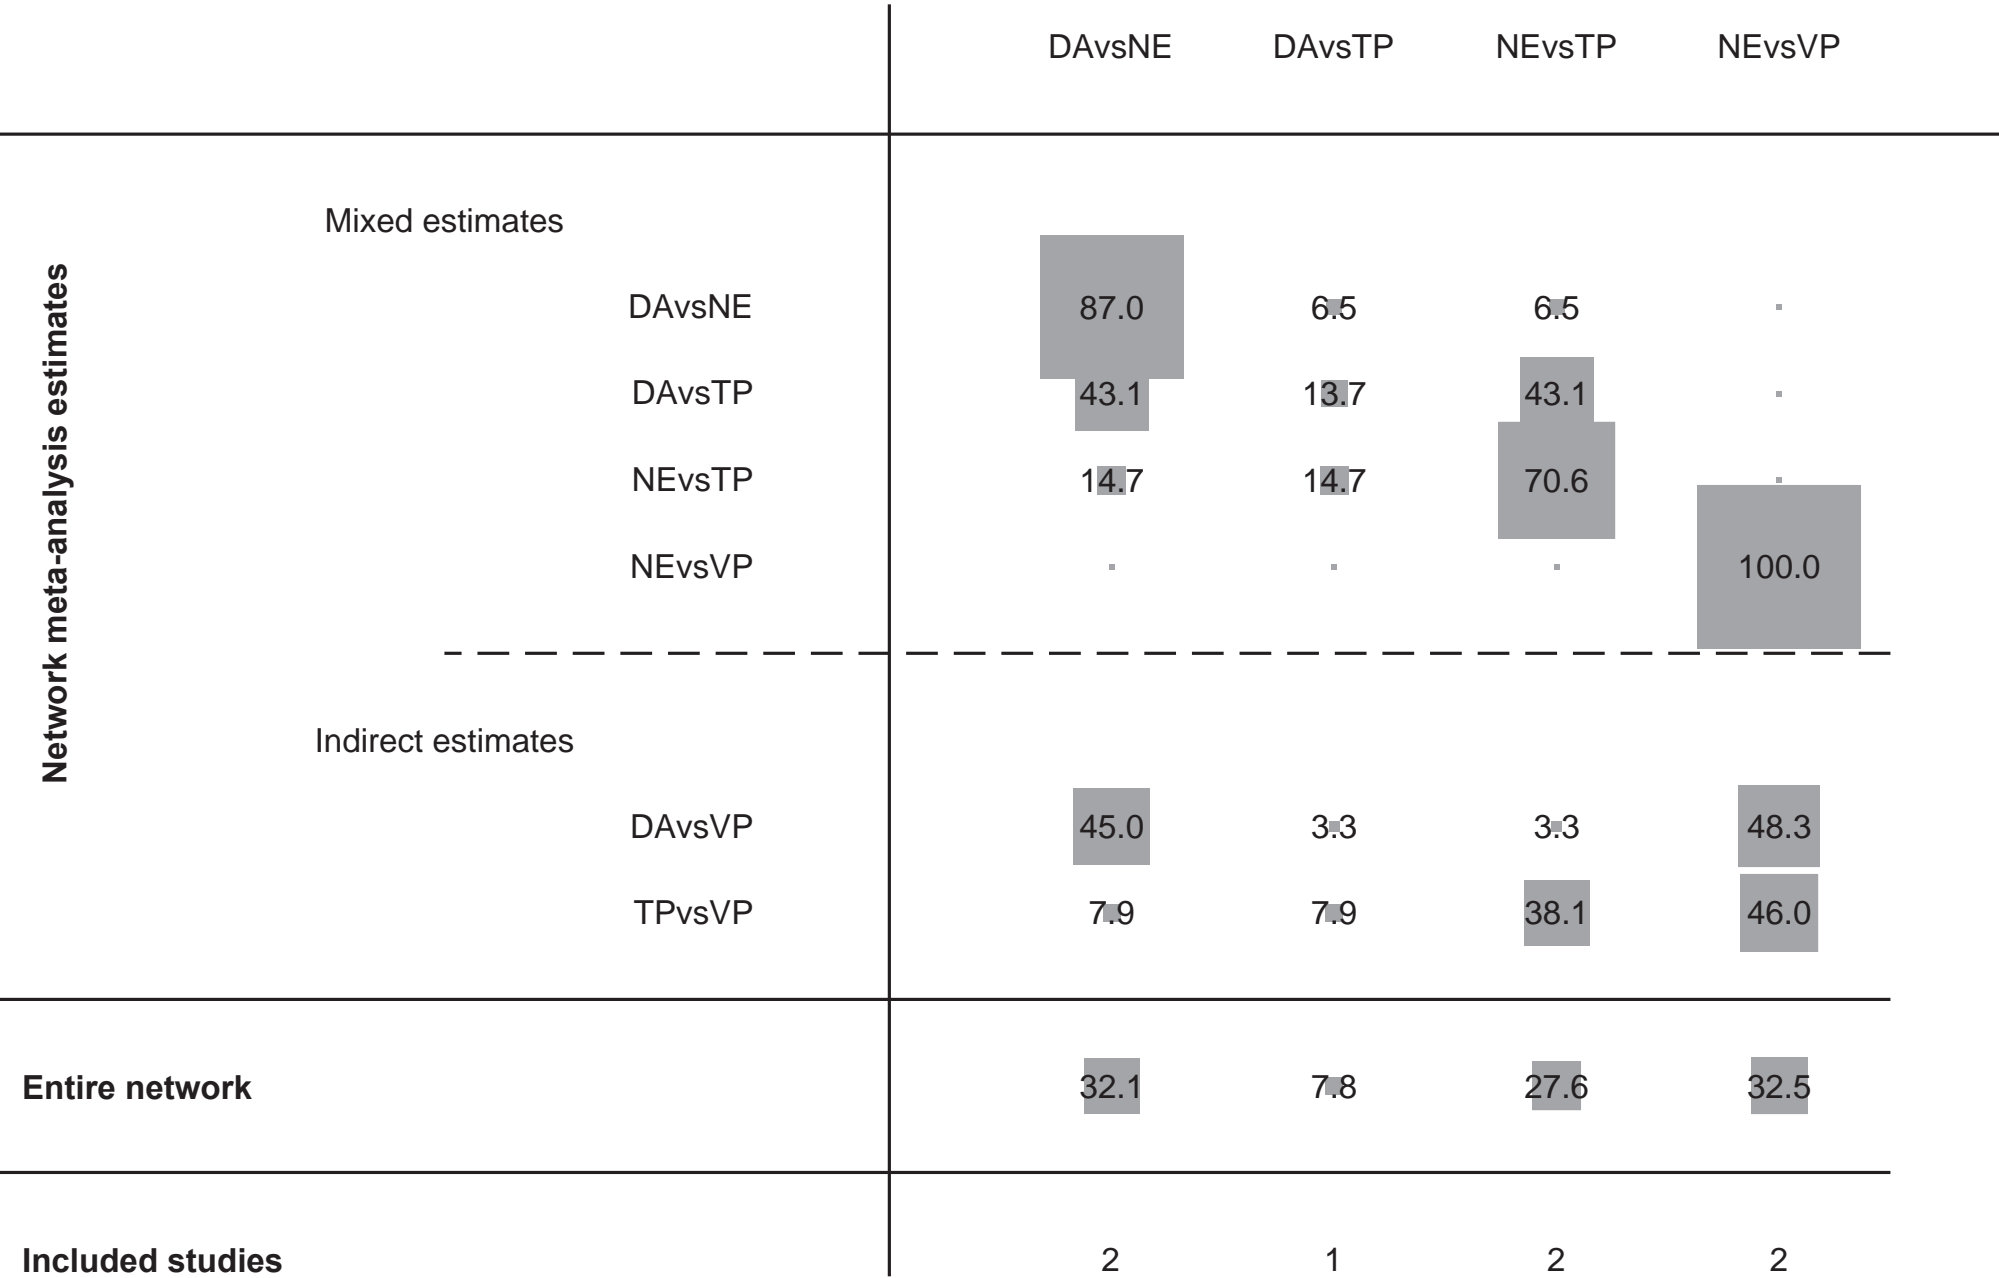

Supplementary Figure S20 Inconsistency analysis for hospital length of stay

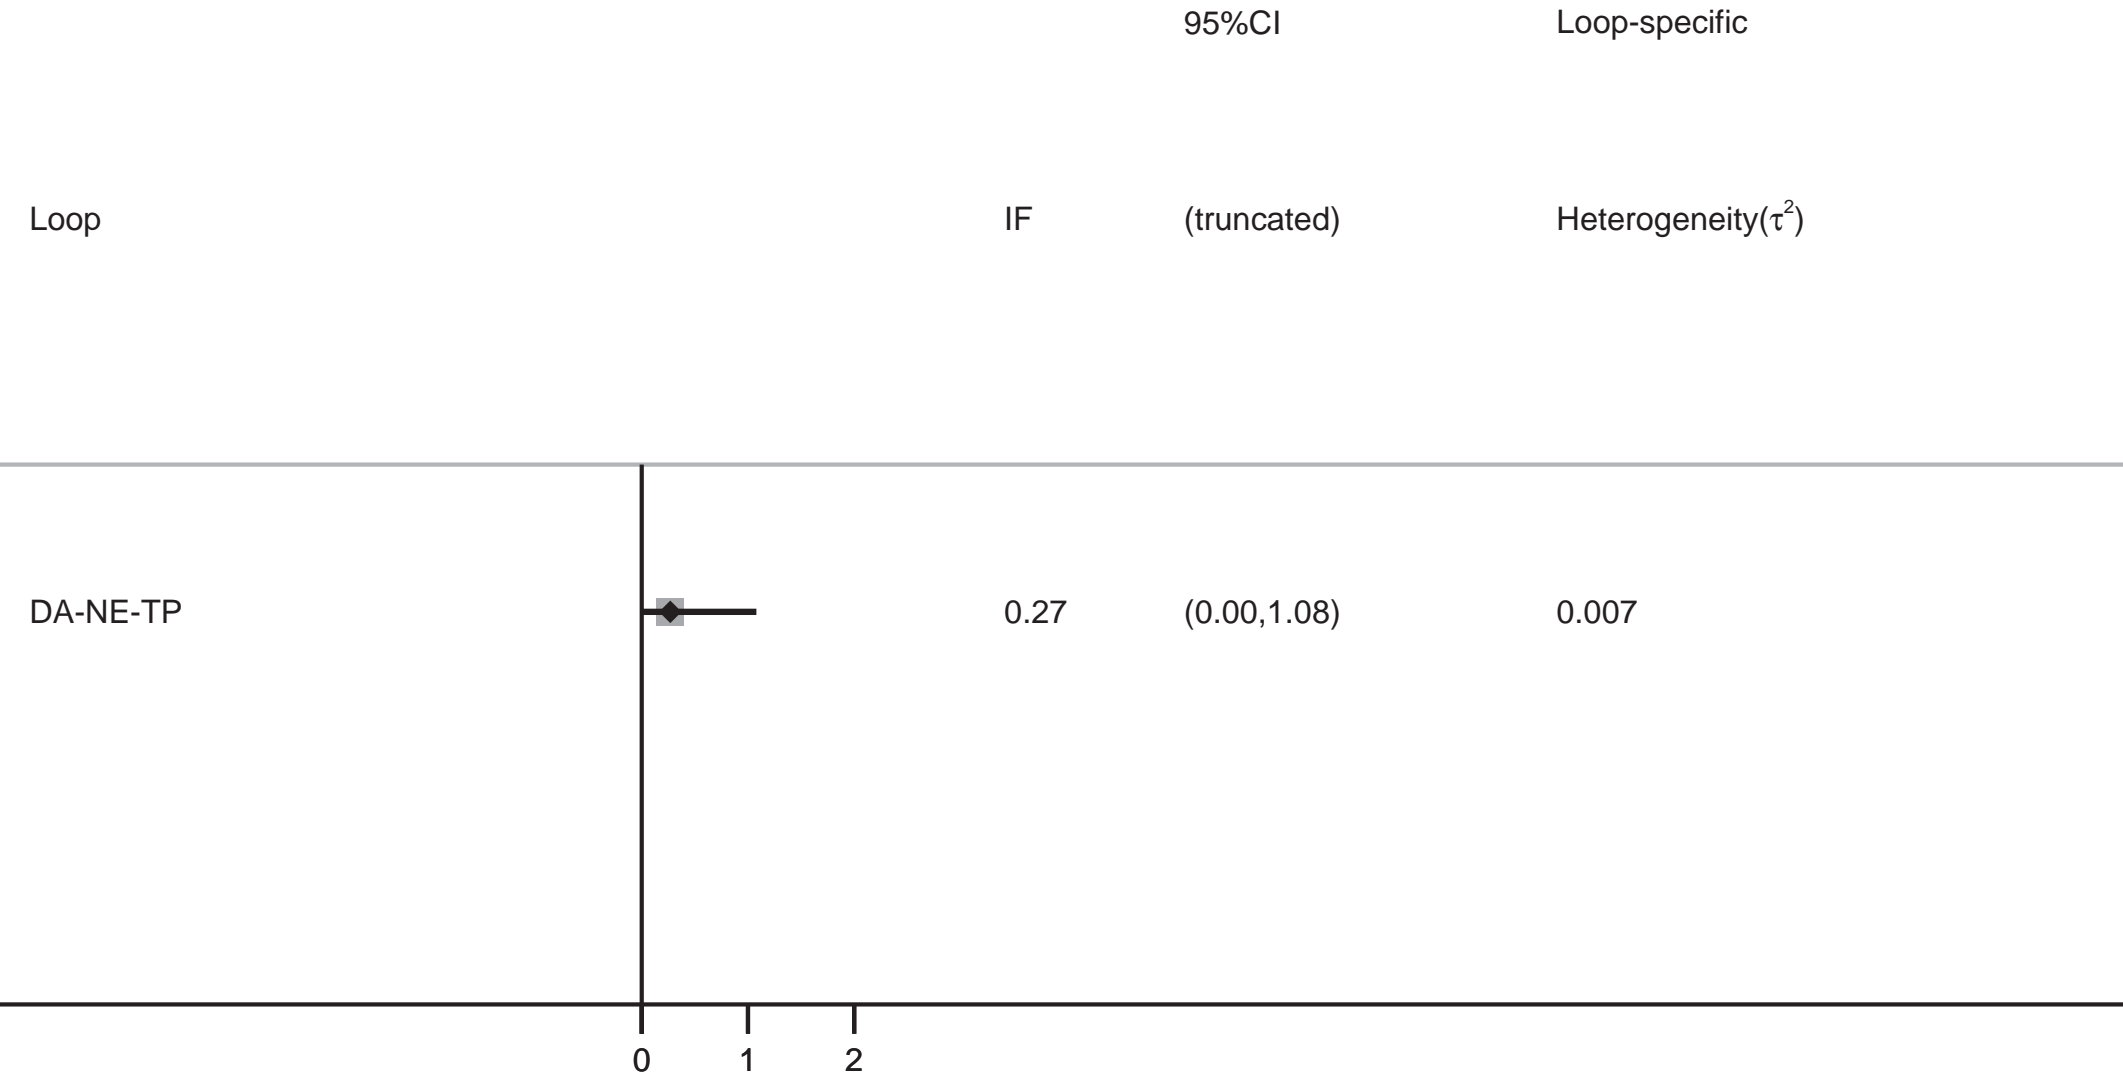

Supplementary Figure S21 Funnel plot for hospital length of stay

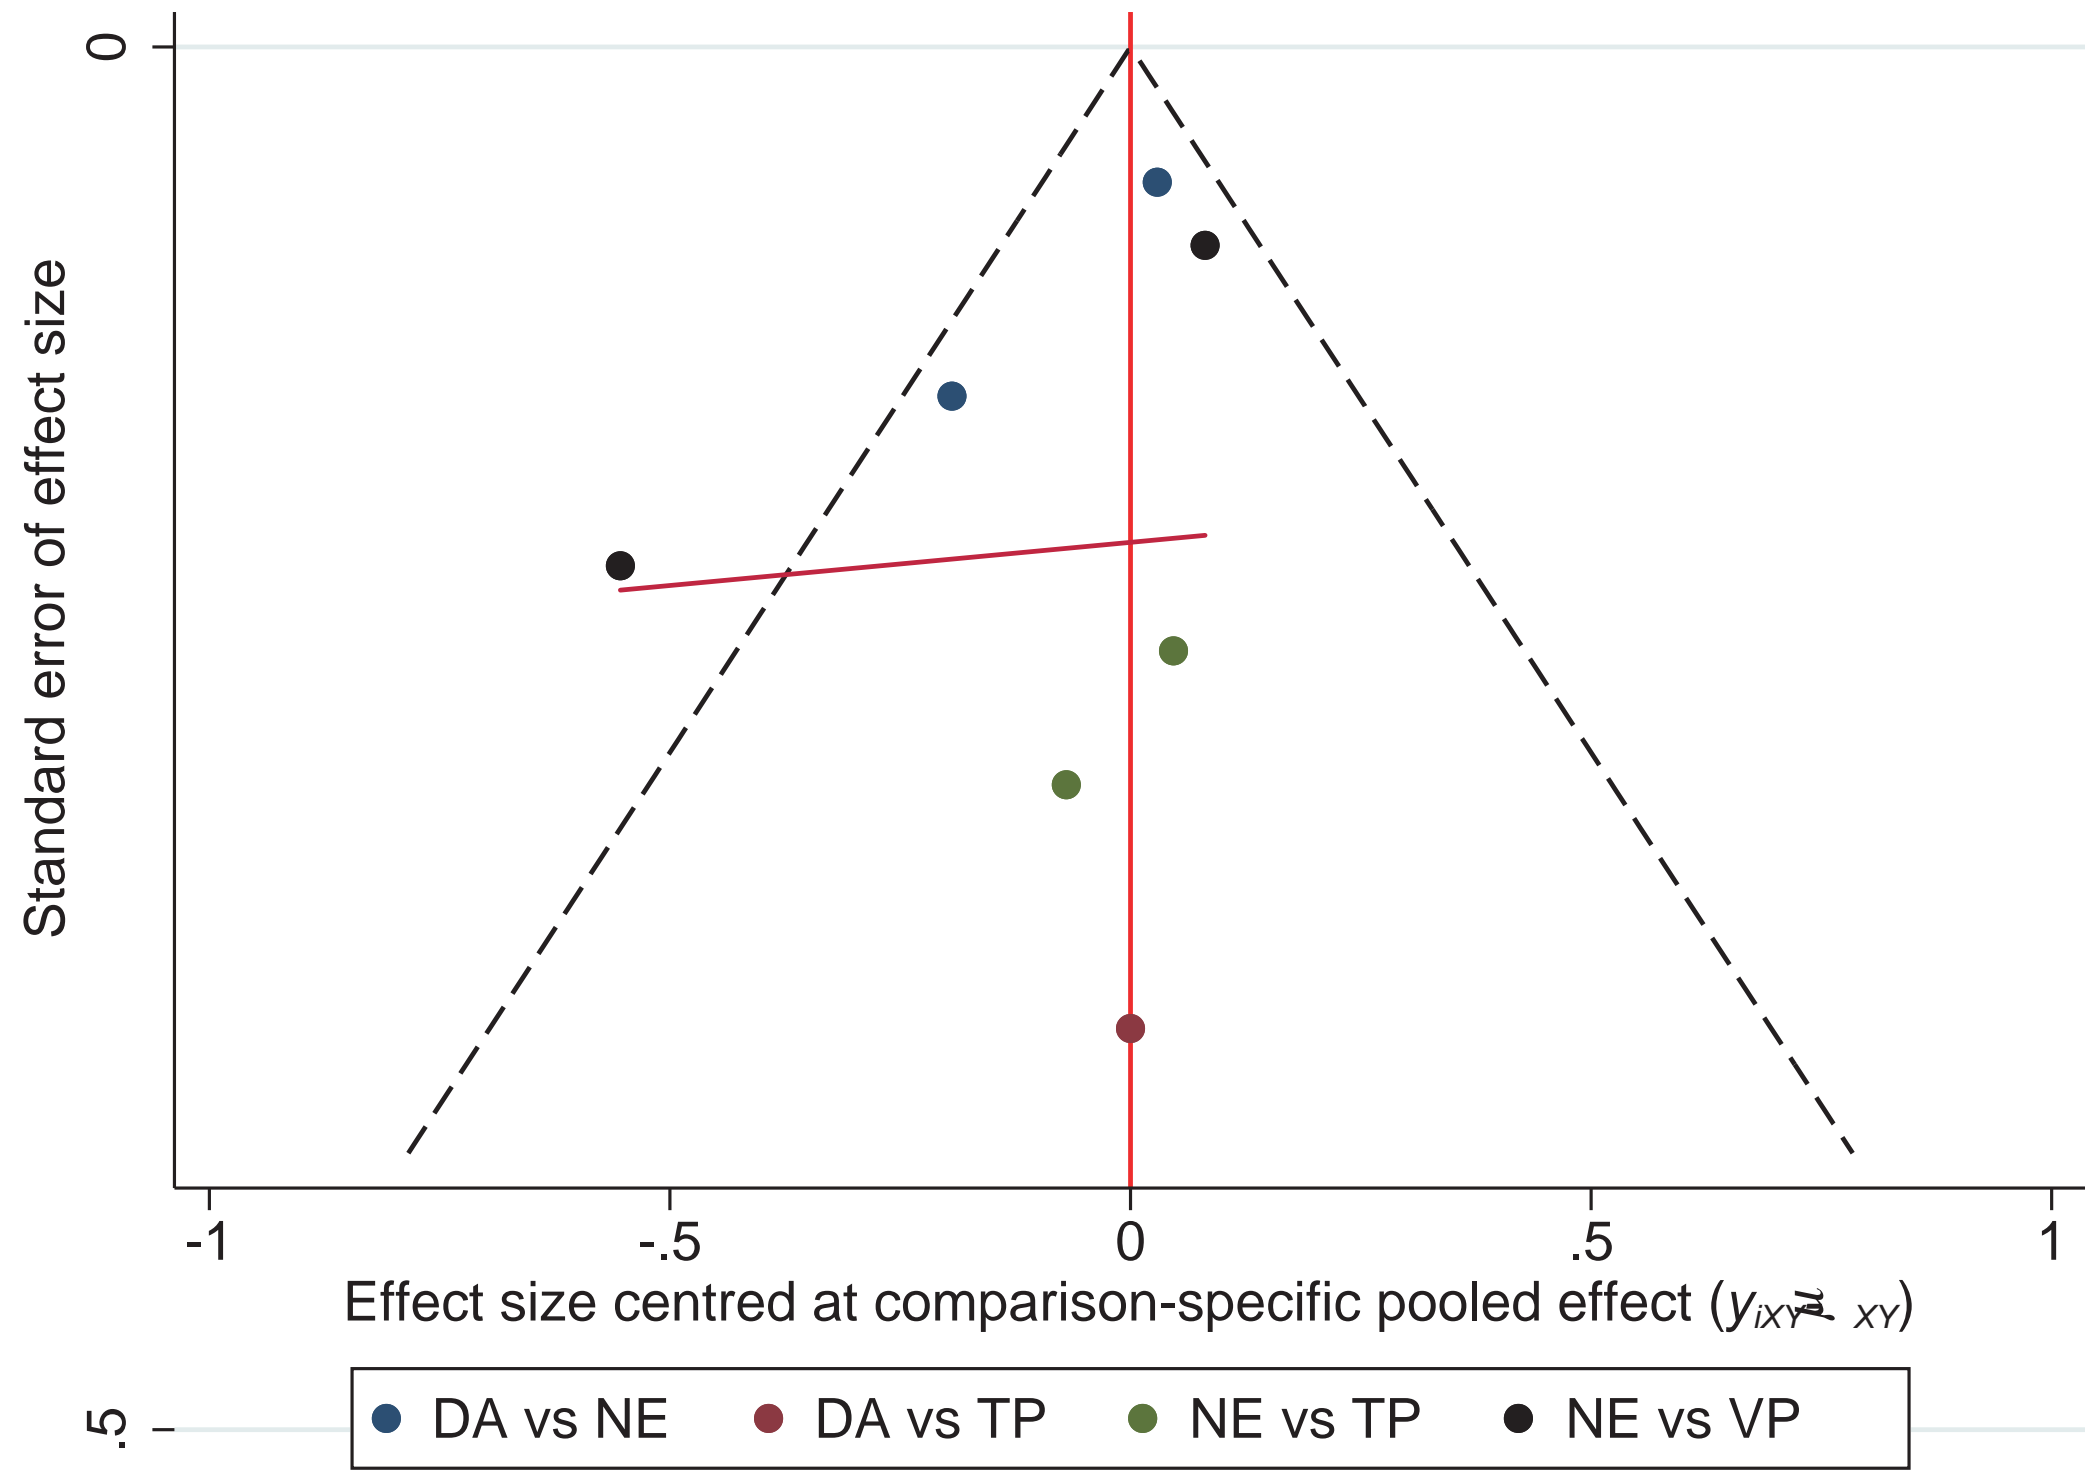

Supplement: MOESM1 [file 16723602]
